# Supplementary material for: Carbon dioxide reduction by mononuclear ruthenium polypyridyl complexes
Source: Royal Society of Chemistry journal article supplement (doi:10.1039/c1cp22814e), 2011-01-01
Supplement: c1cp22814e.pdf [file c1cp22814e.pdf]

Cite this: DOI: 10.1039/c0xx00000x

Supporting Information

www.rsc.org/ees

---

## Carbon Dioxide Reduction by Mononuclear Ruthenium Polypyridyl Complexes

Nora Planas,<sup>a</sup> Takashi Ono,<sup>a</sup> Lydia Vaquer,<sup>a</sup> Pere Miró,<sup>b</sup> Laura Gagliardi,<sup>\*b</sup> Christopher J. Cramer<sup>\*b</sup> and Antoni Llobet<sup>\*a,c</sup>

5

<sup>a</sup> Institute of Chemical Research of Catalonia (ICIQ), Av. Països Catalans 16, E-43007 Tarragona, Spain. Fax: 34 977 902 228; Ph: 34 977 902 200; E-mail: allobet@iciq.es

<sup>b</sup> Department of Chemistry and Supercomputing Institute, University of Minnesota, 207 Pleasant St. SE, Minneapolis, MN 55455-0431 (USA); E-mail: gagliardi@umn.edu, cramer@umn.edu

<sup>c</sup> Departament de Química, Universitat Autònoma de Barcelona, Cerdanyola del Vallès, E-08193 Barcelona, Spain.

1. Gibbs Free Energies of the Catalytic Cycle

15 2. Optimized Structures

## 1. Gibbs Free Energies of the Catalytic Cycle

**Table S1.** Gibbs Free energies at the M06-L DFT level of theory of the different steps in the catalytic cycle for compounds **1**, **1d**, **1d'**, **1w**, **1w'** and **2**. Energies in kcal/mol.

5

|                       | <b>1w</b> | <b>1w'</b> | <b>1</b> | <b>1d'</b> | <b>1d</b> | <b>2</b> |
|-----------------------|-----------|------------|----------|------------|-----------|----------|
| II                    | -8.78     | -7.70      | -9.39    | -11.66     | -9.60     | -9.78    |
| II-a                  | 11.12     | 10.93      | 10.19    | 7.3        | 9.00      | 12.23    |
| II-b                  | -4.32     | -4.79      | -5.91    | -6.33      | -4.93     | -1.07    |
| II-c                  | -15.58    | -13.83     | -13.67   | -12.63     | -13.68    | -20.94   |
| III                   | 12.00     | 13.23      | 11.03    | 10.60      | 10.45     | 22.62    |
| III-a                 | 11.47     | 11.28      | 11.75    | ---        | ---       | ---      |
| III-b                 | 1.27      | 0.76       | 0.28     | ---        | ---       | ---      |
| III-c                 | -0.74     | 1.19       | -1.00    | 0.24       | -0.72     | -1.05    |
| IV-O                  | 3.04      | 0.72       | 4.62     | 7.31       | 5.41      | -4.70    |
| IV-a-O                | 4.57      | 5.90       | 7.97     | 8.84       | 9.55      | 2.53     |
| IV-b-O                | -1.53     | -5.18      | -3.35    | -1.52      | -4.14     | -7.23    |
| IV-N                  | 1.80      | -1.14      | 3.38     | 3.43       | 3.48      | -5.94    |
| IV-a-N                | 8.44      | 6.06       | 8.78     | 9.42       | 9.88      | 7.42     |
| IV-b-N                | 6.64      | -6.58      | -5.40    | -3.35      | -5.71     | -13.36   |
| IV-ON                 | -1.81     | -4.13      | -0.23    | 2.47       | 0.57      | -9.54    |
| $\Delta G_1^\ddagger$ | 11.12     | 10.24      | 10.19    | 7.30       | 9.00      | 12.23    |
| $\Delta G_2^\ddagger$ | 16.56     | 19.13      | 19.00    | 19.43      | 22.00     | 25.16    |

10

15

## 2. Optimized Structures

### 2.1. Tables with selected bond distances and angles.

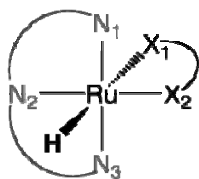

Table S3. Significant structural parameters for the corresponding Ru-H species.

10

|            | Ru-H  | Ru-N1 | Ru-N2 | Ru-N3 | Ru-X1 | Ru-X2 | NI-Ru-N3 | NI-Ru-H | X1-Ru-H | NI-Ru-X2 |
|------------|-------|-------|-------|-------|-------|-------|----------|---------|---------|----------|
| <b>2</b>   | 1.638 | 2.068 | 1.949 | 2.068 | 2.149 | 2.077 | 158.4    | 90.4    | 168.1   | 100.8    |
| <b>1w</b>  | 1.643 | 2.100 | 2.019 | 2.110 | 2.156 | 2.037 | 176.3    | 87.1    | 173.9   | 93.2     |
| <b>1w'</b> | 1.643 | 2.079 | 2.014 | 2.096 | 2.175 | 2.068 | 177.7    | 88.0    | 174.6   | 92.2     |
| <b>1</b>   | 1.647 | 2.095 | 2.017 | 2.106 | 2.167 | 2.060 | 177.2    | 87.9    | 174.0   | 92.5     |
| <b>1d</b>  | 1.653 | 2.109 | 2.021 | 2.114 | 2.155 | 2.058 | 176.7    | 87.9    | 174.1   | 92.8     |
| <b>1d'</b> | 1.651 | 2.097 | 2.013 | 2.101 | 2.176 | 2.090 | 177.7    | 88.6    | 174.3   | 92.0     |
| <b>3</b>   | 1.650 | 2.065 | 1.985 | 2.065 | 2.178 | 2.119 | 179.0    | 89.5    | 178.1   | 89.9     |

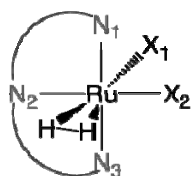

Table S4. Significant structural parameters for the corresponding Ru-H<sub>2</sub> species.

15

|            | Ru-H1 | Ru-H2 | H1-H2 | Ru-N1 | Ru-N2 | Ru-N3 | Ru-X1 | Ru-X2 | NI-Ru-N3 | NI-Ru-H1 |
|------------|-------|-------|-------|-------|-------|-------|-------|-------|----------|----------|
| <b>2</b>   | 1.755 | 1.756 | 0.835 | 2.097 | 1.980 | 2.099 | 2.070 | 2.070 | 157.4    | 78.8     |
| <b>1w</b>  | 1.745 | 1.747 | 0.837 | 2.124 | 2.036 | 2.124 | 2.063 | 2.078 | 176.6    | 88.9     |
| <b>1w'</b> | 1.744 | 1.742 | 0.840 | 2.110 | 2.033 | 2.113 | 2.076 | 2.093 | 177.4    | 90.1     |
| <b>1</b>   | 1.741 | 1.739 | 0.841 | 2.119 | 2.034 | 2.121 | 2.074 | 2.087 | 177.1    | 89.7     |
| <b>1d</b>  | 1.739 | 1.737 | 0.842 | 2.127 | 2.035 | 2.122 | 2.069 | 2.086 | 176.7    | 87.9     |
| <b>1d'</b> | 1.734 | 1.737 | 0.845 | 2.116 | 2.031 | 2.117 | 2.083 | 2.103 | 177.5    | 89.8     |
| <b>3</b>   | 1.714 | 1.725 | 0.853 | 2.088 | 2.011 | 2.088 | 2.062 | 2.110 | 179.3    | 89.7     |

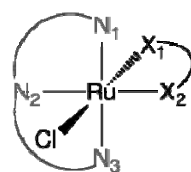

Table S5. Significant structural parameters for the corresponding Ru-Cl species.

20

|            | Ru-Cl | Ru-N1 | Ru-N2 | Ru-N3 | Ru-X1 | Ru-X2 | NI-Ru-N3 | NI-Ru-Cl | X1-Ru-Cl | NI-Ru-X2 |
|------------|-------|-------|-------|-------|-------|-------|----------|----------|----------|----------|
| <b>2</b>   | 2.456 | 2.071 | 1.955 | 2.071 | 2.041 | 2.081 | 159.0    | 89.6     | 172.9    | 100.5    |
| <b>1w</b>  | 2.478 | 2.106 | 2.017 | 2.113 | 2.016 | 2.048 | 177.0    | 88.2     | 175.1    | 92.7     |
| <b>1w'</b> | 2.478 | 2.106 | 2.017 | 2.113 | 2.016 | 2.048 | 177.0    | 88.2     | 175.1    | 92.7     |
| <b>1</b>   | 2.488 | 2.098 | 2.014 | 2.108 | 2.029 | 2.064 | 177.3    | 88.6     | 174.7    | 92.5     |
| <b>1d</b>  | 2.494 | 2.109 | 2.016 | 2.115 | 2.021 | 2.062 | 177.0    | 88.3     | 174.9    | 92.6     |
| <b>1d'</b> | 2.493 | 2.099 | 2.011 | 2.102 | 2.045 | 2.086 | 177.8    | 88.6     | 174.5    | 91.6     |
| <b>3</b>   | 2.490 | 2.069 | 1.990 | 2.069 | 2.059 | 2.098 | 178.7    | 89.3     | 178.5    | 90.0     |

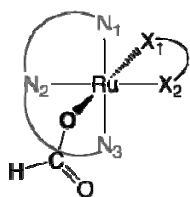

5 Table S6. Significant structural parameters for the corresponding Ru-H-CO<sub>2</sub> species.

|            | Ru-H  | Ru-H-C | O1-C-O2 | Ru-N1 | Ru-N2 | Ru-N3 | Ru-X1 | Ru-X2 | N1-Ru-N3 | N1-Ru-H | X2-Ru-H |
|------------|-------|--------|---------|-------|-------|-------|-------|-------|----------|---------|---------|
| <b>2</b>   | 1.828 | 125.9  | 134.7   | 2.080 | 1.969 | 2.074 | 2.044 | 2.066 | 158.4    | 97.3    | 97.3    |
| <b>lw</b>  | 1.846 | 129.4  | 33.5    | 2.110 | 2.021 | 2.113 | 2.029 | 2.057 | 176.9    | 95.4    | 90.4    |
| <b>lw'</b> | 1.872 | 132.2  | 133.8   | 2.098 | 2.017 | 2.110 | 2.034 | 2.073 | 177.3    | 95.04   | 95.8    |
| <b>1</b>   | 1.846 | 129.4  | 133.5   | 2.110 | 2.021 | 2.113 | 2.029 | 2.057 | 176.9    | 95.43   | 90.3    |
| <b>ld</b>  | 1.864 | 167.7  | 133.2   | 2.113 | 2.021 | 2.120 | 2.020 | 2.059 | 176.2    | 94.6    | 91.3    |
| <b>ld'</b> | 1.841 | 129.1  | 133.2   | 2.109 | 2.017 | 2.108 | 2.041 | 2.076 | 177.4    | 95.9    | 90.9    |
| <b>3</b>   | 1.829 | 123.0  | 132.5   | 2.081 | 1.997 | 2.079 | 2.050 | 2.098 | 179.0    | 86.8    | 98.1    |

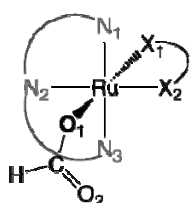

10 Table S7. Significant structural parameters for the corresponding Ru-O1-CHO<sub>2</sub> species.

|            | Ru-O1 | Ru-O1-C | O1-C-O2 | X1-Ru-O1-O2 | Ru-N1 | Ru-N2 | Ru-N3 | Ru-X1 | Ru-X2 | N1-Ru-N3 | N1-Ru-O |
|------------|-------|---------|---------|-------------|-------|-------|-------|-------|-------|----------|---------|
| <b>2</b>   | 2.103 | 126.8   | 128.4   | -165.0      | 2.071 | 1.955 | 2.071 | 2.044 | 2.074 | 158.8    | 86.5    |
| <b>lw</b>  | 2.119 | 125.8   | 128.8   | -139.5      | 2.104 | 2.012 | 2.101 | 2.019 | 2.038 | 176.5    | 84.4    |
| <b>lw'</b> | 2.125 | 126.6   | 128.8   | -142.9      | 2.091 | 2.011 | 2.091 | 2.041 | 2.066 | 177.7    | 84.5    |
| <b>1</b>   | 2.130 | 126.8   | 128.9   | -139.7      | 2.100 | 2.012 | 2.099 | 2.032 | 2.054 | 177.3    | 84.1    |
| <b>ld</b>  | 2.137 | 127.6   | 129.1   | -145.8      | 2.111 | 2.014 | 2.106 | 2.023 | 2.054 | 176.6    | 84.0    |
| <b>ld'</b> | 2.131 | 127.3   | 129.0   | -143.5      | 2.097 | 2.008 | 2.094 | 2.048 | 2.076 | 177.7    | 84.6    |
| <b>3</b>   | 2.133 | 125.5   | 128.7   | -166.4      | 2.071 | 1.993 | 2.063 | 2.060 | 2.094 | 176.9    | 86.6    |

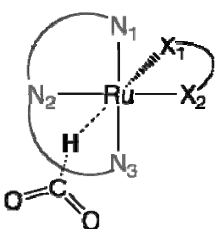

15 Table S8. Significant structural parameters for the corresponding transition state: Ru-H---CO<sub>2</sub>.

|            | Ru-H  | H-C   | Ru-H-C | O1-C-O2 | O1-C  | C-O2    | Ru-N1 | Ru-N2 | Ru-N3 | Ru-X1 | Ru-X2 |
|------------|-------|-------|--------|---------|-------|---------|-------|-------|-------|-------|-------|
| <b>2</b>   | 1.685 | 1.617 | 129.1  | 151.8   | 1.196 | 1.196   | 2.072 | 1.957 | 2.075 | 2.113 | 2.069 |
| <b>lw</b>  | 1.685 | 1.679 | 126.2  | 153.4   | 1.192 | 1.194   | 2.098 | 2.017 | 2.116 | 2.112 | 2.036 |
| <b>lw'</b> | 1.681 | 1.673 | 127.9  | 153.4   | 1.192 | 1.193   | 2.087 | 2.014 | 2.101 | 2.133 | 2.067 |
| <b>1</b>   | 1.687 | 1.700 | 125.3  | 153.7   | 1.192 | 1.193   | 2.099 | 2.015 | 2.112 | 2.125 | 2.061 |
| <b>ld</b>  | 1.688 | 1.718 | 125.7  | 154.0   | 1.191 | 1.192   | 2.108 | 2.017 | 2.120 | 2.115 | 2.057 |
| <b>ld'</b> | 1.687 | 1.714 | 124.7  | 153.7   | 1.192 | 1.193   | 2.098 | 2.013 | 2.110 | 2.137 | 2.085 |
| <b>3</b>   | 1.672 | 1.732 | 125.3  | 154.8   | 1.191 | 1.19092 | 2.073 | 1.989 | 2.082 | 2.145 | 2.106 |

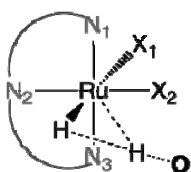

**Table S8.** Significant structural parameters for the corresponding transition state: **Ru-H--H-OCHO**.

5

|            | Ru-H1 | Ru-H2 | H1-H2 | Ru-H1-H2 | H2-O  | H1-H2 O | Ru-N1 | Ru-N2 | Ru-N3 | Ru-X1 | Ru-X2 |
|------------|-------|-------|-------|----------|-------|---------|-------|-------|-------|-------|-------|
| <b>2</b>   | 1.720 | 2.083 | 0.913 | 100.1    | 1.395 | 162.9   | 2.084 | 1.967 | 2.080 | 2.084 | 2.073 |
| <b>lw</b>  | 1.730 | 2.205 | 0.940 | 107.6    | 1.324 | 166.8   | 2.130 | 2.029 | 2.122 | 2.094 | 2.082 |
| <b>lw'</b> | 1.733 | 2.189 | 0.924 | 107.0    | 1.344 | 168.2   | 2.099 | 2.021 | 2.106 | 2.086 | 2.070 |
| <b>1</b>   | 1.731 | 2.197 | 0.938 | 107.0    | 1.325 | 167.6   | 2.118 | 2.023 | 2.112 | 2.085 | 2.070 |
| <b>ld</b>  | 1.733 | 2.225 | 0.940 | 109.0    | 1.315 | 168.7   | 2.116 | 2.023 | 2.121 | 2.076 | 2.060 |
| <b>ld'</b> | 1.723 | 2.205 | 0.945 | 108.0    | 1.311 | 167.7   | 2.113 | 2.019 | 2.107 | 2.099 | 2.093 |
| <b>3</b>   | 1.717 | 2.155 | 0.966 | 103.3    | 1.303 | 166.7   | 2.074 | 1.995 | 2.078 | 2.102 | 2.115 |

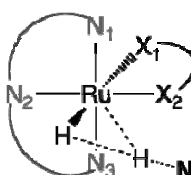

**Table S9.** Significant structural parameters for the corresponding transition state: **Ru-H--H-Nme**

|            | Ru-H1 | Ru-H2 | H1-H2 | Ru-H1-H2 | H2-N  | H1-H2 N | Ru-N1 | Ru-N2 | Ru-N3 | Ru-X1 | Ru-X2 |
|------------|-------|-------|-------|----------|-------|---------|-------|-------|-------|-------|-------|
| <b>2</b>   | 1.724 | 2.026 | 0.877 | 96.9     | 1.624 | 144.0   | 2.088 | 1.970 | 2.079 | 2.075 | 2.071 |
| <b>lw</b>  | 1.722 | 2.063 | 0.893 | 99.2     | 1.535 | 148.0   | 2.111 | 2.024 | 2.109 | 2.069 | 2.047 |
| <b>lw'</b> | 1.718 | 2.070 | 0.900 | 99.7     | 1.516 | 147.0   | 2.096 | 2.070 | 2.102 | 2.088 | 2.070 |
| <b>1</b>   | 1.720 | 2.100 | 0.907 | 101.7    | 1.494 | 149.4   | 2.109 | 2.022 | 2.106 | 2.084 | 2.064 |
| <b>ld</b>  | 1.719 | 2.128 | 0.918 | 103.4    | 1.463 | 150.5   | 2.114 | 2.023 | 2.114 | 2.078 | 2.059 |
| <b>ld'</b> | 1.715 | 2.123 | 0.920 | 103.2    | 1.464 | 150.0   | 2.105 | 2.018 | 2.103 | 2.098 | 2.086 |
| <b>3</b>   | 1.695 | 2.094 | 0.953 | 100.8    | 1.430 | 149.2   | 2.072 | 2.000 | 2.074 | 2.102 | 2.107 |

10

15

## 2.2 Optimized geometries for catalytic system of 2

[Ru(Trpy)(bpy)Cl]<sup>+</sup>

|      |             |             |             |
|------|-------------|-------------|-------------|
| Ru   | 0.03543800  | 0.00051600  | -0.43157800 |
| 5 Cl | -0.54405700 | 0.00225100  | -2.81773900 |
| N    | -0.33526200 | 2.03621500  | -0.35541300 |
| N    | -0.33427000 | -2.03552000 | -0.35845100 |
| N    | 2.09163400  | 0.00143000  | -0.75392700 |
| N    | 0.75783000  | -0.00123600 | 1.47700400  |
| 10 C | -2.53209100 | -1.19532100 | 0.12371900  |
| C    | -2.53270000 | 1.19421800  | 0.12532600  |
| C    | -3.89745700 | 1.20926400  | 0.42270100  |
| H    | -4.42762400 | 2.15495300  | 0.53514700  |
| C    | -4.57648400 | -0.00137000 | 0.57351000  |
| 15 H | -5.64186000 | -0.00179400 | 0.80700300  |
| C    | -3.89683200 | -1.21145600 | 0.42111400  |
| H    | -4.42651000 | -2.15757100 | 0.53230000  |
| C    | -1.65485300 | -2.35137300 | -0.07899800 |
| C    | -2.07739700 | -3.68126100 | -0.00852300 |
| 20 H | -3.12286600 | -3.90638800 | 0.20298600  |
| C    | -1.16363200 | -4.71060700 | -0.21450500 |
| H    | -1.48716100 | -5.75109200 | -0.16235300 |
| C    | 0.16712400  | -4.39019500 | -0.49028400 |
| H    | 0.91261900  | -5.16772600 | -0.65835900 |
| 25 C | 0.54223000  | -3.05302200 | -0.55591200 |
| H    | 1.56883100  | -2.75869200 | -0.77846900 |
| C    | -1.65606400 | 2.35099200  | -0.07576800 |
| C    | -2.07935800 | 3.68055700  | -0.00370500 |
| H    | -3.12498400 | 3.90484900  | 0.20793600  |
| 30 C | -1.16614100 | 4.71066200  | -0.20831700 |
| H    | -1.49025700 | 5.75090300  | -0.15495900 |
| C    | 0.16483100  | 4.39132600  | -0.48430800 |
| H    | 0.90991200  | 5.16948000  | -0.65134700 |
| C    | 0.54070100  | 3.05444600  | -0.55151000 |
| 35 H | 1.56750900  | 2.76096600  | -0.77424100 |
| C    | 2.71787400  | 0.00344400  | -1.96318200 |
| H    | 2.05526100  | 0.00441700  | -2.83050500 |
| C    | 4.10023100  | 0.00420900  | -2.09402200 |
| H    | 4.54510300  | 0.00585800  | -3.08953200 |
| 40 C | 4.89685200  | 0.00290900  | -0.94589500 |
| H    | 5.98529700  | 0.00352800  | -1.01949200 |
| C    | 4.27667200  | 0.00086300  | 0.29823300  |
| H    | 4.87477100  | 0.00002500  | 1.20912600  |
| C    | 2.87985400  | 0.00015500  | 0.37763200  |
| 45 C | 2.12951900  | -0.00171100 | 1.62882300  |
| C    | 2.71397700  | -0.00383200 | 2.90007000  |
| H    | 3.79910400  | -0.00444500 | 2.99566300  |
| C    | 1.91241800  | -0.00532700 | 4.03539700  |
| H    | 2.36311700  | -0.00704000 | 5.02861400  |
| 50 C | 0.52409800  | -0.00460900 | 3.87886800  |
| H    | -0.14347700 | -0.00565700 | 4.74081100  |
| C    | -0.01474500 | -0.00257500 | 2.60000100  |
| H    | -1.09281200 | -0.00201300 | 2.44248200  |
| N    | -1.87222600 | -0.00029600 | -0.00272800 |

55 [Ru(Trpy)(bpy)]<sup>2+</sup>

|      |             |             |             |
|------|-------------|-------------|-------------|
| Ru   | 0.04515700  | -0.00012100 | -0.63895400 |
| N    | -0.33379000 | 2.04682100  | -0.55646500 |
| N    | -0.33560900 | -2.04676400 | -0.55643000 |
| 60 N | 2.08973100  | -0.00091500 | -0.88739800 |
| N    | 0.64094500  | -0.00026400 | 1.25152800  |
| C    | -2.55993300 | -1.19304600 | -0.21478400 |
| C    | -2.55888300 | 1.19504900  | -0.21487000 |

|                                                       |             |             |             |
|-------------------------------------------------------|-------------|-------------|-------------|
| C                                                     | -3.94130300 | 1.21255900  | -0.02169400 |
| H                                                     | -4.47703300 | 2.15870900  | 0.04768600  |
| C                                                     | -4.63018100 | 0.00192600  | 0.07386300  |
| H                                                     | -5.71071700 | 0.00240400  | 0.22187000  |
| 5 C                                                   | -3.94237800 | -1.20931900 | -0.02165300 |
| H                                                     | -4.47895700 | -2.15498300 | 0.04776400  |
| C                                                     | -1.66850600 | -2.35338000 | -0.32546900 |
| C                                                     | -2.09158100 | -3.67772900 | -0.20317700 |
| H                                                     | -3.14446500 | -3.89597900 | -0.02294200 |
| 10 C                                                  | -1.16447200 | -4.71236900 | -0.30463500 |
| H                                                     | -1.48756900 | -5.74976600 | -0.20809100 |
| C                                                     | 0.17720800  | -4.40192000 | -0.52723200 |
| H                                                     | 0.93283300  | -5.18369400 | -0.60778200 |
| C                                                     | 0.55370200  | -3.06821200 | -0.64622000 |
| 15 H                                                  | 1.59071900  | -2.78175300 | -0.82517000 |
| C                                                     | -1.66644900 | 2.35459900  | -0.32566600 |
| C                                                     | -2.08842000 | 3.67932500  | -0.20363100 |
| H                                                     | -3.14114300 | 3.89850000  | -0.02357500 |
| C                                                     | -1.16041800 | 4.71316400  | -0.30511800 |
| 20 H                                                  | -1.48264800 | 5.75084800  | -0.20877200 |
| C                                                     | 0.18102600  | 4.40154500  | -0.52749400 |
| H                                                     | 0.93732700  | 5.18266300  | -0.60804900 |
| C                                                     | 0.55639900  | 3.06750100  | -0.64628000 |
| H                                                     | 1.59318900  | 2.78013600  | -0.82508200 |
| 25 C                                                  | 2.75208200  | -0.00144100 | -2.07409900 |
| H                                                     | 2.12294300  | -0.00150300 | -2.96633500 |
| C                                                     | 4.13887500  | -0.00185700 | -2.15107600 |
| H                                                     | 4.62517900  | -0.00228800 | -3.12673000 |
| C                                                     | 4.88788800  | -0.00169300 | -0.97062200 |
| 30 H                                                  | 5.97824200  | -0.00197000 | -1.00333500 |
| C                                                     | 4.22409800  | -0.00117500 | 0.25184000  |
| H                                                     | 4.78965900  | -0.00104700 | 1.18323000  |
| C                                                     | 2.82644200  | -0.00083800 | 0.27539000  |
| C                                                     | 2.00723600  | -0.00048000 | 1.48080400  |
| 35 C                                                  | 2.51046800  | -0.00045400 | 2.78446700  |
| H                                                     | 3.58805300  | -0.00063100 | 2.94340400  |
| C                                                     | 1.64271900  | -0.00022000 | 3.87024800  |
| H                                                     | 2.03326900  | -0.00019400 | 4.88840200  |
| C                                                     | 0.26706500  | -0.00003800 | 3.63187000  |
| 40 H                                                  | -0.45107400 | 0.00012400  | 4.45201000  |
| C                                                     | -0.20046800 | -0.00006400 | 2.32554300  |
| H                                                     | -1.26714400 | 0.00006400  | 2.10865900  |
| N                                                     | -1.89711700 | 0.00070600  | -0.31051900 |
| 45 <b>[Ru(Trpy)(bpy)(H<sub>2</sub>)]<sup>2+</sup></b> |             |             |             |
| Ru                                                    | 0.04116200  | -0.00315400 | -0.68583100 |
| N                                                     | -0.33586400 | 2.05682200  | -0.54893000 |
| N                                                     | -0.35488200 | -2.05732500 | -0.54582800 |
| N                                                     | 2.10277000  | -0.01209900 | -0.87579300 |
| 50 N                                                  | 0.65227800  | -0.00255300 | 1.29181400  |
| C                                                     | -2.56978900 | -1.18295900 | -0.20606900 |
| C                                                     | -2.55876400 | 1.20162500  | -0.20796100 |
| C                                                     | -3.93485800 | 1.22585500  | 0.02739100  |
| H                                                     | -4.46165900 | 2.17442900  | 0.12517100  |
| 55 C                                                  | -4.62755400 | 0.01917900  | 0.13608400  |
| H                                                     | -5.70331000 | 0.02433800  | 0.31532100  |
| C                                                     | -3.94631600 | -1.19390800 | 0.02911600  |
| H                                                     | -4.48192800 | -2.13733000 | 0.12868000  |
| C                                                     | -1.68521300 | -2.34951000 | -0.30290500 |
| 60 C                                                  | -2.11266800 | -3.66935300 | -0.14486600 |
| H                                                     | -3.16473200 | -3.87930400 | 0.04846100  |
| C                                                     | -1.18975300 | -4.70884200 | -0.22652000 |
| H                                                     | -1.51588400 | -5.74238800 | -0.10239400 |

|      |             |             |             |
|------|-------------|-------------|-------------|
| C    | 0.15127300  | -4.40932900 | -0.46538300 |
| H    | 0.90373000  | -5.19526500 | -0.53206700 |
| C    | 0.53128800  | -3.07969000 | -0.61849900 |
| H    | 1.56765100  | -2.80003400 | -0.81168300 |
| 5 C  | -1.66384500 | 2.36048300  | -0.30807500 |
| C    | -2.08096600 | 3.68433800  | -0.15668700 |
| H    | -3.13150000 | 3.90369400  | 0.03445200  |
| C    | -1.14970600 | 4.71613400  | -0.24292000 |
| H    | -1.46787600 | 5.75281800  | -0.12446000 |
| 10 C | 0.18895100  | 4.40498600  | -0.47937500 |
| H    | 0.94763300  | 5.18460200  | -0.54950900 |
| C    | 0.55841000  | 3.07146900  | -0.62576500 |
| H    | 1.59254300  | 2.78253100  | -0.81716400 |
| C    | 2.78348200  | -0.02064500 | -2.05432500 |
| 15 H | 2.17037200  | -0.02431900 | -2.95613600 |
| C    | 4.17063000  | -0.02484000 | -2.11620500 |
| H    | 4.66596800  | -0.03214400 | -3.08727300 |
| C    | 4.90649700  | -0.01939100 | -0.92881900 |
| H    | 5.99717400  | -0.02196000 | -0.94803900 |
| 20 C | 4.22659100  | -0.01097000 | 0.28412400  |
| H    | 4.78201600  | -0.00706600 | 1.22138100  |
| C    | 2.82811500  | -0.00810900 | 0.29430500  |
| C    | 2.01186100  | -0.00172000 | 1.50668000  |
| C    | 2.53053700  | 0.00427000  | 2.80531200  |
| 25 H | 3.60808600  | 0.00477400  | 2.96102800  |
| C    | 1.66841400  | 0.00999900  | 3.89610600  |
| H    | 2.06790500  | 0.01510900  | 4.91108300  |
| C    | 0.29112700  | 0.00906700  | 3.67195000  |
| H    | -0.41875500 | 0.01311600  | 4.49895200  |
| 30 C | -0.18001000 | 0.00248900  | 2.36518500  |
| H    | -1.24879000 | 0.00105900  | 2.15225300  |
| N    | -1.90935600 | 0.00614500  | -0.34259400 |
| H    | -0.27267900 | 0.41749100  | -2.36099700 |
| H    | -0.21809700 | -0.41605200 | -2.37248700 |

35  
**[Ru(Trpy)(bpy)(H)]<sup>+</sup>**

|      |             |             |             |
|------|-------------|-------------|-------------|
| Ru   | -0.00871400 | 0.00049600  | -0.65216100 |
| N    | -0.38840300 | 2.03154600  | -0.57710000 |
| N    | -0.38792000 | -2.03073200 | -0.57904100 |
| 40 N | 2.05295000  | 0.00106500  | -0.90569700 |
| N    | 0.75145500  | -0.00092200 | 1.35767600  |
| C    | -2.59320200 | -1.19582300 | -0.15575100 |
| C    | -2.59349400 | 1.19569800  | -0.15469600 |
| C    | -3.96433000 | 1.20838900  | 0.10938000  |
| 45 H | -4.49332000 | 2.15576900  | 0.21347100  |
| C    | -4.65195900 | -0.00048700 | 0.23455300  |
| H    | -5.72392700 | -0.00070200 | 0.43550600  |
| C    | -3.96402900 | -1.20908900 | 0.10836500  |
| H    | -4.49279500 | -2.15668500 | 0.21165200  |
| 50 C | -1.71089500 | -2.34981500 | -0.29788400 |
| C    | -2.12051200 | -3.67945800 | -0.15630000 |
| H    | -3.16476400 | -3.90019800 | 0.06731200  |
| C    | -1.19647100 | -4.70959700 | -0.29287900 |
| H    | -1.50918800 | -5.74890500 | -0.18279700 |
| 55 C | 0.13580200  | -4.38914800 | -0.57057800 |
| H    | 0.89168100  | -5.16700500 | -0.68347800 |
| C    | 0.49963100  | -3.05587500 | -0.70436200 |
| H    | 1.52691900  | -2.76447000 | -0.92720600 |
| C    | -1.71148600 | 2.35004500  | -0.29575800 |
| 60 C | -2.12146200 | 3.67945800  | -0.15303500 |
| H    | -3.16578600 | 3.89973000  | 0.07072000  |
| C    | -1.19768000 | 4.70995500  | -0.28867200 |
| H    | -1.51066800 | 5.74908600  | -0.17770000 |



|      |             |             |             |
|------|-------------|-------------|-------------|
| C    | 0.13469400  | 4.39009100  | -0.56657000 |
| H    | 0.89037700  | 5.16824600  | -0.67874100 |
| C    | 0.49888600  | 3.05703600  | -0.70148400 |
| H    | 1.52627400  | 2.76610000  | -0.92448300 |
| 5 C  | 2.68514800  | 0.00254600  | -2.11708600 |
| H    | 2.02758400  | 0.00329400  | -2.98619900 |
| C    | 4.06547100  | 0.00309300  | -2.25309000 |
| H    | 4.50622600  | 0.00429900  | -3.25049200 |
| C    | 4.86650200  | 0.00212500  | -1.10699700 |
| 10 H | 5.95474400  | 0.00255700  | -1.18314200 |
| C    | 4.24681200  | 0.00063900  | 0.13645700  |
| H    | 4.84595300  | 0.00000400  | 1.04670700  |
| C    | 2.84959900  | 0.00013000  | 0.22374500  |
| C    | 2.11755700  | -0.00129400 | 1.48972000  |
| 15 C | 2.72434200  | -0.00296600 | 2.75249400  |
| H    | 3.81046800  | -0.00338600 | 2.83829800  |
| C    | 1.93375000  | -0.00421000 | 3.89616400  |
| H    | 2.39693600  | -0.00555800 | 4.88401600  |
| C    | 0.54238200  | -0.00373300 | 3.76006400  |
| 20 H | -0.11086600 | -0.00465500 | 4.63290800  |
| C    | -0.00701300 | -0.00208800 | 2.48400300  |
| H    | -1.08797100 | -0.00171200 | 2.32950100  |
| N    | -1.92550000 | 0.00008600  | -0.30279900 |
| H    | -0.26055000 | 0.00130500  | -2.27085600 |

25

**TS = [Ru(Tprry)(bpy)(H-H-NMe<sub>3</sub>)<sup>2+</sup>**

|      |             |             |             |
|------|-------------|-------------|-------------|
| Ru   | 0.17760600  | 0.01735100  | -0.27117900 |
| N    | 0.59044200  | 1.96601800  | -0.86821100 |
| N    | -0.80358800 | -1.54287600 | 0.70990000  |
| 30 N | 1.83695400  | -0.99576900 | -0.98501300 |
| N    | 1.50834700  | 0.19118200  | 1.31173700  |
| C    | -2.24915100 | 0.29348900  | 1.28571700  |
| C    | -1.44959200 | 2.33647200  | 0.344886500 |
| C    | -2.52828100 | 3.03218200  | 0.89461400  |
| 35 H | -2.62963200 | 4.10563900  | 0.73712800  |
| C    | -3.47445900 | 2.33552000  | 1.64849700  |
| H    | -4.32222600 | 2.86716400  | 2.08201200  |
| C    | -3.33509700 | 0.96211000  | 1.85522700  |
| H    | -4.06772600 | 0.41865200  | 2.45122100  |
| 40 C | -1.94261900 | -1.13770400 | 1.38701600  |
| C    | -2.72047400 | -2.05411400 | 2.09906400  |
| H    | -3.61831700 | -1.71694500 | 2.61762700  |
| C    | -2.34182500 | -3.39328300 | 2.14722300  |
| H    | -2.94404500 | -4.11418000 | 2.70188800  |
| 45 C | -1.18297800 | -3.79484200 | 1.48099400  |
| H    | -0.85119800 | -4.83305600 | 1.49958800  |
| C    | -0.44523600 | -2.84963500 | 0.77609900  |
| H    | 0.45928800  | -3.12252200 | 0.23034400  |
| C    | -0.34469200 | 2.89456100  | -0.43996800 |
| 50 C | -0.20174400 | 4.25116300  | -0.73952900 |
| H    | -0.95022500 | 4.96366200  | -0.39164100 |
| C    | 0.89827200  | 4.68568500  | -1.47381700 |
| H    | 1.01699300  | 5.74373500  | -1.71129200 |
| C    | 1.84372500  | 3.74977800  | -1.89626600 |
| 55 H | 2.72023300  | 4.05082400  | -2.47048000 |
| C    | 1.65913600  | 2.40878200  | -1.57817300 |
| H    | 2.36958700  | 1.64319300  | -1.89266200 |
| C    | 1.92619700  | -1.60692500 | -2.19953000 |
| H    | 1.04415300  | -1.52398400 | -2.83587100 |
| 60 C | 3.06025100  | -2.29131700 | -2.61431800 |
| H    | 3.07527400  | -2.76101400 | -3.59808100 |
| C    | 4.16371500  | -2.36556700 | -1.75969500 |
| H    | 5.06776200  | -2.89723200 | -2.05970600 |

|                                                               |             |             |             |
|---------------------------------------------------------------|-------------|-------------|-------------|
| C                                                             | 4.09046600  | -1.75078100 | -0.51497700 |
| H                                                             | 4.93727200  | -1.79761100 | 0.16943300  |
| C                                                             | 2.92448500  | -1.07346400 | -0.14187200 |
| C                                                             | 2.74045200  | -0.39865600 | 1.14146100  |
| 5 C                                                           | 3.71359200  | -0.33289800 | 2.14437400  |
| H                                                             | 4.68269100  | -0.80660100 | 1.99318000  |
| C                                                             | 3.44069000  | 0.33776300  | 3.33115200  |
| H                                                             | 4.19528800  | 0.39194000  | 4.11716700  |
| C                                                             | 2.19133600  | 0.93831300  | 3.49776900  |
| 10 H                                                          | 1.93905500  | 1.47603900  | 4.41176900  |
| C                                                             | 1.25594800  | 0.84757700  | 2.47492100  |
| H                                                             | 0.27095900  | 1.30552900  | 2.56849100  |
| N                                                             | -1.33785100 | 0.98499700  | 0.53417000  |
| H                                                             | -0.55036300 | -0.07054800 | -1.83177900 |
| 15 H                                                          | -1.27603800 | -0.49640900 | -1.58603900 |
| N                                                             | -2.66384500 | -1.14448900 | -2.12445200 |
| C                                                             | -2.69574000 | -2.59758600 | -1.90035100 |
| H                                                             | -1.72438300 | -3.03225000 | -2.19219600 |
| H                                                             | -2.87707900 | -2.80435300 | -0.83351700 |
| 20 H                                                          | -3.49486000 | -3.08655400 | -2.49474300 |
| C                                                             | -3.88675500 | -0.50059400 | -1.62039400 |
| H                                                             | -4.05976700 | -0.80069200 | -0.57491500 |
| H                                                             | -3.77132000 | 0.59591800  | -1.66660000 |
| H                                                             | -4.77591900 | -0.78749700 | -2.21897100 |
| 25 C                                                          | -2.48993100 | -0.85343000 | -3.55687600 |
| H                                                             | -2.43216800 | 0.23797500  | -3.70370900 |
| H                                                             | -1.55019100 | -1.30937200 | -3.91146600 |
| H                                                             | -3.32913100 | -1.25191200 | -4.16053200 |
| 30 <b>TS = [Ru(Tprry)(bpy)(H-CO<sub>2</sub>)<sup>1+</sup></b> |             |             |             |
| Ru                                                            | -0.04455300 | 0.02905600  | -0.36221100 |
| H                                                             | 0.39185700  | -0.11817000 | -1.98323900 |
| N                                                             | 0.60968200  | -1.88626000 | 0.09673000  |
| N                                                             | 0.03671600  | 2.08272800  | -0.60996900 |
| 35 N                                                          | -2.03700500 | -0.31666300 | -0.79994100 |
| N                                                             | -0.98202300 | 0.21510400  | 1.52175400  |
| C                                                             | 2.29255100  | 1.67132200  | 0.09605500  |
| C                                                             | 2.62470700  | -0.65655600 | 0.52283100  |
| C                                                             | 3.95694700  | -0.41875700 | 0.86611600  |
| 40 H                                                          | 4.60471200  | -1.24299700 | 1.16363000  |
| C                                                             | 4.45395100  | 0.88480900  | 0.81800900  |
| H                                                             | 5.49428900  | 1.08126200  | 1.07991000  |
| C                                                             | 3.62093100  | 1.93734400  | 0.43488900  |
| H                                                             | 4.00588500  | 2.95615800  | 0.39733100  |
| 45 C                                                          | 1.27433900  | 2.63818600  | -0.31577300 |
| C                                                             | 1.48591100  | 4.01644700  | -0.41073400 |
| H                                                             | 2.46758600  | 4.43041500  | -0.17950600 |
| C                                                             | 0.44422600  | 4.85450700  | -0.79550700 |
| H                                                             | 0.60405900  | 5.93099000  | -0.87027600 |
| 50 C                                                          | -0.80355100 | 4.29550300  | -1.08136900 |
| H                                                             | -1.64594600 | 4.91824400  | -1.38356300 |
| C                                                             | -0.96904100 | 2.91975500  | -0.98009100 |
| H                                                             | -1.92409200 | 2.44175800  | -1.20203500 |
| C                                                             | 1.93164700  | -1.94553800 | 0.51491600  |
| 55 C                                                          | 2.51466500  | -3.15938400 | 0.88864900  |
| H                                                             | 3.55493200  | -3.18359500 | 1.21323300  |
| C                                                             | 1.76483100  | -4.33076500 | 0.84667300  |
| H                                                             | 2.21407700  | -5.28150900 | 1.13703300  |
| C                                                             | 0.43302600  | -4.26885700 | 0.42921900  |
| 60 H                                                          | -0.18633400 | -5.16490700 | 0.38283300  |
| C                                                             | -0.10632400 | -3.04163200 | 0.06448200  |
| H                                                             | -1.13883400 | -2.94846200 | -0.27614900 |
| C                                                             | -2.52441800 | -0.57482200 | -2.04783200 |

|      |             |             |             |
|------|-------------|-------------|-------------|
| H    | -1.78006600 | -0.61184700 | -2.84400300 |
| C    | -3.87240700 | -0.78456400 | -2.30155200 |
| H    | -4.20138300 | -0.98676100 | -3.32130000 |
| C    | -4.78457100 | -0.73287700 | -1.24321400 |
| 5 H  | -5.84967400 | -0.89554000 | -1.41392500 |
| C    | -4.30910000 | -0.46784200 | 0.03577200  |
| H    | -4.99940100 | -0.42107000 | 0.87792200  |
| C    | -2.94049800 | -0.26080500 | 0.24223800  |
| C    | -2.34429500 | 0.03195800  | 1.54441400  |
| 10 C | -3.06535200 | 0.12788800  | 2.74073800  |
| H    | -4.14487400 | -0.01911700 | 2.74067300  |
| C    | -2.39906800 | 0.41082900  | 3.92756900  |
| H    | -2.95367700 | 0.48747100  | 4.86394700  |
| C    | -1.01398900 | 0.59437700  | 3.90159000  |
| 15 H | -0.45563300 | 0.81683300  | 4.81166600  |
| C    | -0.34374600 | 0.48931700  | 2.68929800  |
| H    | 0.73679100  | 0.62628900  | 2.62243500  |
| N    | 1.81416800  | 0.38397600  | 0.13736400  |
| C    | 1.13831600  | -1.34198700 | -2.73115800 |
| 20 O | 0.24229400  | -2.04407400 | -3.09709800 |
| O    | 2.29735000  | -1.05258000 | -2.68262200 |

**[Ru(Tppy)(bpy)(H-CO<sub>2</sub>)<sup>+</sup>**

|      |             |             |             |
|------|-------------|-------------|-------------|
| Ru   | 0.06952400  | -0.00648200 | -0.35316900 |
| 25 N | -0.06444500 | 2.05641600  | -0.52560100 |
| N    | -0.53916300 | -1.95880400 | 0.02886900  |
| N    | 2.06780800  | -0.29226200 | -0.79357500 |
| N    | 0.93234200  | 0.15601200  | 1.49322600  |
| C    | -2.58284100 | -0.79152100 | 0.51232700  |
| 30 C | -2.31308300 | 1.55391000  | 0.16182300  |
| C    | -3.65155300 | 1.77443700  | 0.49380500  |
| H    | -4.06698000 | 2.78146000  | 0.47841600  |
| C    | -4.45480000 | 0.68720100  | 0.84005200  |
| H    | -5.50243600 | 0.84643600  | 1.09814100  |
| 35 C | -3.92409400 | -0.60381000 | 0.85214000  |
| H    | -4.55306800 | -1.45378400 | 1.11484200  |
| C    | -1.85660800 | -2.06499700 | 0.44418800  |
| C    | -2.41309000 | -3.30771000 | 0.75312800  |
| H    | -3.45178400 | -3.37328600 | 1.07646800  |
| 40 C | -1.63795300 | -4.45961600 | 0.64398900  |
| H    | -2.06698300 | -5.43354000 | 0.88362000  |
| C    | -0.31153400 | -4.34884300 | 0.22482600  |
| H    | 0.32545900  | -5.22783300 | 0.12548800  |
| C    | 0.20125100  | -3.09097400 | -0.07329700 |
| 45 H | 1.23076100  | -2.95684900 | -0.40851900 |
| C    | -1.31902300 | 2.56248900  | -0.22216500 |
| C    | -1.57405400 | 3.93404900  | -0.28443600 |
| H    | -2.56873200 | 4.31290900  | -0.04934200 |
| C    | -0.55613500 | 4.81288700  | -0.64533000 |
| 50 H | -0.74986900 | 5.88522300  | -0.69515700 |
| C    | 0.70860400  | 4.30182200  | -0.93928700 |
| H    | 1.53176000  | 4.95764900  | -1.22326600 |
| C    | 0.91688500  | 2.92868300  | -0.87077200 |
| H    | 1.88700300  | 2.48573800  | -1.10043900 |
| 55 C | 2.57205500  | -0.54615200 | -2.03211000 |
| H    | 1.83335500  | -0.63197200 | -2.83197600 |
| C    | 3.93162700  | -0.70305100 | -2.26642300 |
| H    | 4.28278000  | -0.90384400 | -3.27889900 |
| C    | 4.82614200  | -0.60272900 | -1.19667600 |
| 60 H | 5.89907200  | -0.72164500 | -1.35374600 |
| C    | 4.32610500  | -0.35264600 | 0.07676700  |
| H    | 5.00220200  | -0.27682900 | 0.92819800  |
| C    | 2.94823800  | -0.20080500 | 0.26118600  |

|                                           |             |             |             |
|-------------------------------------------|-------------|-------------|-------------|
| C                                         | 2.30671200  | 0.05576800  | 1.54605400  |
| C                                         | 2.98941000  | 0.18988900  | 2.75926000  |
| H                                         | 4.07595900  | 0.11146200  | 2.77862300  |
| C                                         | 2.28114400  | 0.42254200  | 3.93239900  |
| 5 H                                       | 2.80843400  | 0.52912700  | 4.88131500  |
| C                                         | 0.88885200  | 0.51728600  | 3.87433800  |
| H                                         | 0.29572500  | 0.69753400  | 4.77095900  |
| C                                         | 0.25026600  | 0.38164000  | 2.64887400  |
| H                                         | -0.83381800 | 0.45165600  | 2.56264100  |
| 10 N                                      | -1.80407900 | 0.28398600  | 0.17878900  |
| C                                         | -1.06420700 | -0.77950200 | -2.69876500 |
| H                                         | -0.39231400 | 0.03961200  | -2.12135200 |
| O                                         | -2.25677600 | -0.46115200 | -2.74928800 |
| O                                         | -0.38356600 | -1.68546400 | -3.19370200 |
| 15                                        |             |             |             |
| <b>[Ru(Trpy)(bpy)(O-COH)]<sup>+</sup></b> |             |             |             |
| Ru                                        | -0.08682500 | 0.04572400  | -0.38754200 |
| N                                         | 0.38218700  | -1.97180700 | -0.36937800 |
| N                                         | 0.18379000  | 2.09259900  | -0.22148100 |
| 20 N                                      | -2.11129700 | -0.02772100 | -0.83357300 |
| N                                         | -0.90973800 | -0.11204000 | 1.47668700  |
| C                                         | 2.37378500  | 1.33163900  | 0.40243800  |
| C                                         | 2.46862700  | -1.05456000 | 0.38467600  |
| C                                         | 3.79726000  | -1.02174500 | 0.80799000  |
| 25 H                                      | 4.34892700  | -1.94898900 | 0.96220400  |
| C                                         | 4.41650200  | 0.21247900  | 1.01996700  |
| H                                         | 5.45715600  | 0.25049200  | 1.34408000  |
| C                                         | 3.70650200  | 1.39657700  | 0.81671100  |
| H                                         | 4.18667400  | 2.36136800  | 0.98008600  |
| 30 C                                      | 1.46838600  | 2.45562000  | 0.15377800  |
| C                                         | 1.82860300  | 3.80046100  | 0.27396200  |
| H                                         | 2.84579400  | 4.06444600  | 0.56363200  |
| C                                         | 0.88952500  | 4.79482000  | 0.01681000  |
| H                                         | 1.16488500  | 5.84659000  | 0.10666800  |
| 35 C                                      | -0.40418400 | 4.42633100  | -0.35868300 |
| H                                         | -1.16699500 | 5.17616400  | -0.56919800 |
| C                                         | -0.71821000 | 3.07670500  | -0.46881900 |
| H                                         | -1.71391700 | 2.74407500  | -0.76543000 |
| C                                         | 1.66856300  | -2.24044400 | 0.07440700  |
| 40 C                                      | 2.13100700  | -3.55298300 | 0.18669800  |
| H                                         | 3.14754500  | -3.73954000 | 0.53338500  |
| C                                         | 1.29388500  | -4.61436400 | -0.14664300 |
| H                                         | 1.64955100  | -5.64215800 | -0.06184300 |
| C                                         | -0.00133600 | -4.34220400 | -0.59078800 |
| 45 H                                      | -0.68632300 | -5.14597200 | -0.86150100 |
| C                                         | -0.42024400 | -3.01980500 | -0.68799500 |
| H                                         | -1.42290800 | -2.76119200 | -1.03147300 |
| C                                         | -2.65887800 | 0.03289700  | -2.07842300 |
| H                                         | -1.94390400 | 0.10825000  | -2.89890100 |
| 50 C                                      | -4.02980600 | 0.00442100  | -2.29561000 |
| H                                         | -4.41411400 | 0.05609200  | -3.31469900 |
| C                                         | -4.89362600 | -0.08641200 | -1.20053200 |
| H                                         | -5.97509900 | -0.10496000 | -1.34230700 |
| C                                         | -4.35172000 | -0.15263100 | 0.07816300  |
| 55 H                                      | -5.00636800 | -0.21935200 | 0.94662500  |
| C                                         | -2.96283000 | -0.12678700 | 0.24564300  |
| C                                         | -2.28695400 | -0.19442500 | 1.53874500  |
| C                                         | -2.94620000 | -0.33510700 | 2.76470800  |
| H                                         | -4.03293700 | -0.40839300 | 2.79051600  |
| 60 C                                      | -2.21614800 | -0.38671500 | 3.94625000  |
| H                                         | -2.72574700 | -0.49840000 | 4.90418200  |
| C                                         | -0.82390200 | -0.29284800 | 3.88231900  |
| H                                         | -0.21225400 | -0.32469300 | 4.78427900  |

|     |             |             |             |
|-----|-------------|-------------|-------------|
| C   | -0.20965000 | -0.15853900 | 2.64515200  |
| H   | 0.87407100  | -0.08242200 | 2.55820200  |
| N   | 1.77853200  | 0.11507700  | 0.19262700  |
| C   | 1.39409900  | -0.02936500 | -3.05509100 |
| 5 H | 1.34595900  | 0.23169500  | -4.13527800 |
| O   | 0.31122100  | 0.28866900  | -2.43767300 |
| O   | 2.40848700  | -0.56189400 | -2.59864900 |

**TS = [Ru(Tprry)(bpy)(H--H-OCHO)]<sup>1+</sup>**

|       |             |             |             |
|-------|-------------|-------------|-------------|
| 10 Ru | 0.09778200  | 0.05137400  | -0.38321000 |
| N     | 0.63036400  | 2.02017300  | -0.78925000 |
| N     | -1.08756800 | -1.53835800 | 0.25793600  |
| N     | 1.91793100  | -0.87459500 | -0.74255600 |
| N     | 0.99848800  | 0.09969800  | 1.49548600  |
| 15 C  | -2.63627700 | 0.26918800  | 0.55646300  |
| C     | -1.63228300 | 2.34911300  | -0.04782300 |
| C     | -2.80479400 | 3.02987500  | 0.28655300  |
| H     | -2.86482500 | 4.11246000  | 0.17868800  |
| C     | -3.90256500 | 2.30801000  | 0.75855000  |
| 20 H  | -4.82413100 | 2.82961900  | 1.01980500  |
| C     | -3.82166400 | 0.92221900  | 0.90047600  |
| H     | -4.67353600 | 0.35587900  | 1.27600400  |
| C     | -2.36005500 | -1.16572000 | 0.65299500  |
| C     | -3.28797700 | -2.11507100 | 1.08800300  |
| 25 H  | -4.28711700 | -1.79865800 | 1.38808900  |
| C     | -2.93472600 | -3.46028600 | 1.12266700  |
| H     | -3.65611600 | -4.20924500 | 1.45245600  |
| C     | -1.64782100 | -3.83427500 | 0.72997300  |
| H     | -1.33284500 | -4.87779000 | 0.74515400  |
| 30 C  | -0.75625200 | -2.85316800 | 0.31117500  |
| H     | 0.25671000  | -3.09954600 | -0.01008700 |
| C     | -0.38079700 | 2.93454300  | -0.53782300 |
| C     | -0.18145100 | 4.30184100  | -0.74361200 |
| H     | -0.99097600 | 5.00392900  | -0.54417900 |
| 35 C  | 1.05061800  | 4.76205300  | -1.19966700 |
| H     | 1.21237600  | 5.82849700  | -1.36261200 |
| C     | 2.07019200  | 3.84070900  | -1.44297700 |
| H     | 3.04968100  | 4.16158000  | -1.79832600 |
| C     | 1.82633900  | 2.48868400  | -1.22857100 |
| 40 H  | 2.59263000  | 1.73466000  | -1.41257400 |
| C     | 2.35373400  | -1.31877800 | -1.95525800 |
| H     | 1.65843400  | -1.18933200 | -2.78454200 |
| C     | 3.60212300  | -1.89650800 | -2.14069800 |
| H     | 3.89548200  | -2.23274400 | -3.13558300 |
| 45 C  | 4.46148600  | -2.03343300 | -1.04744500 |
| H     | 5.44933700  | -2.48092200 | -1.16495300 |
| C     | 4.03778600  | -1.58183000 | 0.19714100  |
| H     | 4.69534600  | -1.66614100 | 1.06191100  |
| C     | 2.76900000  | -1.00901500 | 0.33509900  |
| 50 C  | 2.23691500  | -0.49174000 | 1.59472800  |
| C     | 2.89969600  | -0.57110300 | 2.82493300  |
| H     | 3.87254800  | -1.05700200 | 2.89039200  |
| C     | 2.30972200  | -0.03645800 | 3.96470000  |
| H     | 2.81992100  | -0.09712900 | 4.92700600  |
| 55 C  | 1.05911700  | 0.57564000  | 3.85696500  |
| H     | 0.56431600  | 1.00997100  | 4.72574200  |
| C     | 0.43631300  | 0.62315700  | 2.61663900  |
| H     | -0.54236500 | 1.08803900  | 2.49268000  |
| N     | -1.56925200 | 0.98591700  | 0.08205600  |
| 60 H  | -0.44072300 | 0.08046600  | -2.01612600 |
| H     | -0.57431600 | -0.81160700 | -2.15604600 |
| C     | -2.06563200 | -2.31279900 | -2.68086900 |
| H     | -2.31495200 | -3.35990500 | -2.97390900 |

|   |             |             |             |
|---|-------------|-------------|-------------|
| 0 | -0.81148400 | -2.04525200 | -2.76256800 |
| 0 | -2.97620200 | -1.55280600 | -2.32460300 |

5

10

15

20

25

30

35

### 7.3 Optimized geometries for catalytic system of I

#### [Ru(Bid)(bpy)(Cl)]

|    |    |             |             |             |
|----|----|-------------|-------------|-------------|
| 5  | Ru | -0.40593600 | 0.15874700  | -0.41870300 |
|    | Cl | -0.06020000 | 0.60043600  | -2.84299000 |
|    | N  | 1.58879200  | -0.02435500 | -0.20820800 |
|    | N  | 1.83146500  | -2.45591100 | -0.18673000 |
|    | N  | -0.50270400 | -1.91716600 | -0.77415100 |
| 10 | N  | 2.25432300  | 2.32470600  | -0.09973400 |
|    | N  | -0.21064500 | 2.21816300  | -0.06874900 |
|    | N  | -2.46607200 | 0.27164300  | -0.47073900 |
|    | N  | -0.86759400 | -0.24000600 | 1.51657500  |
|    | C  | 2.27903200  | -1.21963200 | -0.13223300 |
| 15 | C  | 3.71207300  | -0.91845000 | 0.04082500  |
|    | C  | 3.83864900  | 0.47752200  | 0.03872700  |
|    | C  | 2.47988600  | 1.03080400  | -0.10720500 |
|    | C  | 4.82271700  | -1.74210600 | 0.17345000  |
|    | H  | 4.71953100  | -2.82950800 | 0.17304000  |
| 20 | C  | 6.07862100  | -1.13214300 | 0.30711800  |
|    | H  | 6.97183500  | -1.75148000 | 0.41476200  |
|    | C  | 6.20532500  | 0.26497800  | 0.30355800  |
|    | H  | 7.19525300  | 0.71470700  | 0.40662900  |
|    | C  | 5.07863600  | 1.08938100  | 0.16908000  |
| 25 | H  | 5.17111700  | 2.17767400  | 0.16499900  |
|    | C  | 1.00233300  | 2.89953800  | -0.08292700 |
|    | C  | 1.02618400  | 4.31766500  | -0.01784200 |
|    | H  | 2.00677700  | 4.79043600  | -0.05738300 |
|    | C  | -0.13106400 | 5.05560900  | 0.11481000  |
| 30 | H  | -0.09845600 | 6.14551200  | 0.16741300  |
|    | C  | -1.34666800 | 4.36238900  | 0.20041700  |
|    | H  | -2.29484200 | 4.88435700  | 0.33159900  |
|    | C  | -1.33743400 | 2.98240400  | 0.10542000  |
|    | H  | -2.27422800 | 2.43407300  | 0.15961400  |
| 35 | C  | 0.53390000  | -2.80093300 | -0.49125800 |
|    | C  | 0.31514800  | -4.20294300 | -0.56105500 |
|    | H  | 1.16006100  | -4.84096300 | -0.30496300 |
|    | C  | -0.89543900 | -4.72673500 | -0.96132100 |
|    | H  | -1.04904700 | -5.80621700 | -1.01516200 |
| 40 | C  | -1.91297700 | -3.83209600 | -1.32305900 |
|    | H  | -2.87972200 | -4.18154000 | -1.68620200 |
|    | C  | -1.67639600 | -2.47353800 | -1.21640900 |
|    | H  | -2.45152800 | -1.76877200 | -1.50680000 |
|    | C  | -3.23600100 | 0.63744400  | -1.53465100 |
| 45 | H  | -2.67827300 | 0.93820600  | -2.42423500 |
|    | C  | -4.62344500 | 0.61238100  | -1.50358500 |
|    | H  | -5.18780500 | 0.91105100  | -2.38769500 |
|    | C  | -5.27323600 | 0.19425500  | -0.33745400 |
|    | H  | -6.36233200 | 0.15442800  | -0.28791400 |
| 50 | C  | -4.50623700 | -0.16485800 | 0.76527400  |
|    | H  | -4.99155200 | -0.48320900 | 1.68751200  |
|    | C  | -3.10965100 | -0.1184100  | 0.68915600  |
|    | C  | -2.21062000 | -0.40162700 | 1.80411200  |
|    | C  | -2.63483700 | -0.77442000 | 3.08484400  |
| 55 | H  | -3.69755200 | -0.90519100 | 3.28840700  |
|    | C  | -1.70210200 | -0.97498200 | 4.09576900  |
|    | H  | -2.02622400 | -1.26978300 | 5.09476200  |
|    | C  | -0.34688800 | -0.78544800 | 3.80918500  |
|    | H  | 0.41753100  | -0.92253800 | 4.57450700  |
| 60 | C  | 0.03121700  | -0.42221900 | 2.52454400  |
|    | H  | 1.07672900  | -0.26545400 | 2.25927500  |

#### [Ru(Bid)(bpy)(H<sub>2</sub>)]<sup>+</sup>

|      |             |             |             |
|------|-------------|-------------|-------------|
| Ru   | -0.45782700 | 0.03713400  | -0.67020100 |
| N    | 1.56588700  | 0.00463400  | -0.46658700 |
| N    | 1.97964800  | -2.40375600 | -0.34583800 |
| N    | -0.43558400 | -2.08282300 | -0.74676400 |
| 5 N  | 2.05884500  | 2.39585600  | -0.32356600 |
| N    | -0.37991100 | 2.15388400  | -0.62877100 |
| N    | -2.53989200 | 0.04532100  | -0.53248800 |
| N    | -0.74917700 | -0.04022100 | 1.38202200  |
| C    | 2.33293400  | -1.14147300 | -0.32870300 |
| 10 C | 3.73193700  | -0.73322800 | -0.10548800 |
| C    | 3.75564000  | 0.66636300  | -0.10122800 |
| C    | 2.37064300  | 1.12287100  | -0.31779700 |
| C    | 4.89093200  | -1.47563900 | 0.08092800  |
| H    | 4.86650800  | -2.56748700 | 0.07802900  |
| 15 C | 6.09064800  | -0.77572900 | 0.27068700  |
| H    | 7.02116500  | -1.32800100 | 0.41836500  |
| C    | 6.11438800  | 0.62722300  | 0.27457400  |
| H    | 7.06298400  | 1.14709500  | 0.42469800  |
| C    | 4.93893800  | 1.36819900  | 0.08934900  |
| 20 H | 4.95105300  | 2.46024300  | 0.09254200  |
| C    | 0.78461800  | 2.89741900  | -0.48400400 |
| C    | 0.73265400  | 4.31514000  | -0.48897700 |
| H    | 1.68127400  | 4.83650700  | -0.37004000 |
| C    | -0.45738900 | 4.99524400  | -0.63857900 |
| 25 H | -0.48240100 | 6.08651800  | -0.64179400 |
| C    | -1.62953400 | 4.24385400  | -0.78856100 |
| H    | -2.60226200 | 4.71907500  | -0.91554300 |
| C    | -1.54440100 | 2.86318700  | -0.77877400 |
| H    | -2.44616800 | 2.27144000  | -0.90771300 |
| 30 C | 0.69629800  | -2.86394600 | -0.55104700 |
| C    | 0.59912900  | -4.27929800 | -0.56450900 |
| H    | 1.52260400  | -4.83141800 | -0.39674900 |
| C    | -0.60120300 | -4.91998000 | -0.78705700 |
| H    | -0.66143100 | -6.00979400 | -0.79540700 |
| 35 C | -1.73592000 | -4.13054400 | -1.01148000 |
| H    | -2.71225300 | -4.57352900 | -1.20837400 |
| C    | -1.60828900 | -2.75350600 | -0.98374600 |
| H    | -2.47944600 | -2.13205900 | -1.17096100 |
| C    | -3.41860400 | 0.10096500  | -1.57387900 |
| 40 H | -2.97225400 | 0.14879200  | -2.56797200 |
| C    | -4.79566600 | 0.09927700  | -1.40070200 |
| H    | -5.44732000 | 0.14556900  | -2.27335000 |
| C    | -5.31779800 | 0.03960700  | -0.10649800 |
| H    | -6.39520300 | 0.03811800  | 0.06340200  |
| 45 C | -4.43800900 | -0.01600900 | 0.96812200  |
| H    | -4.82233500 | -0.05991900 | 1.98609600  |
| C    | -3.05743900 | -0.01391400 | 0.74114400  |
| C    | -2.05746600 | -0.06704300 | 1.80816600  |
| C    | -2.37261100 | -0.13521200 | 3.16934000  |
| 50 H | -3.41399500 | -0.15916900 | 3.48763300  |
| C    | -1.35411000 | -0.17172500 | 4.11494600  |
| H    | -1.59217900 | -0.22335800 | 5.17821200  |
| C    | -0.02905000 | -0.13986400 | 3.67931200  |
| H    | 0.80042800  | -0.16436300 | 4.38609400  |
| 55 C | 0.23571900  | -0.07613300 | 2.31700700  |
| H    | 1.25777900  | -0.04881900 | 1.94208400  |
| H    | 0.09973200  | 0.05891200  | -2.31901200 |
| H    | -0.73253800 | 0.16484200  | -2.38268200 |

60 [Ru(Bid)(bpy)(H)]

|    |             |            |             |
|----|-------------|------------|-------------|
| Ru | -0.39860400 | 0.20758900 | -0.62877300 |
| H  | -0.19338100 | 0.49137900 | -2.23839600 |
| N  | 1.59807800  | 0.01354200 | -0.42371600 |



|                                    |             |             |             |
|------------------------------------|-------------|-------------|-------------|
| N                                  | 1.82269500  | -2.42221600 | -0.37039900 |
| N                                  | -0.50936900 | -1.86972800 | -0.95467300 |
| N                                  | 2.27784600  | 2.35902200  | -0.29622000 |
| N                                  | -0.18738000 | 2.26863900  | -0.31739500 |
| 5 N                                | -2.45599200 | 0.32412200  | -0.60853200 |
| N                                  | -0.88208100 | -0.22834300 | 1.43776900  |
| C                                  | 2.27749000  | -1.18690400 | -0.31211300 |
| C                                  | 3.70505100  | -0.89617700 | -0.09254500 |
| C                                  | 3.84202400  | 0.49954500  | -0.09298200 |
| 10 C                               | 2.49408800  | 1.06095400  | -0.28889800 |
| C                                  | 4.80455400  | -1.72742200 | 0.08293200  |
| H                                  | 4.69273800  | -2.81404500 | 0.08226400  |
| C                                  | 6.05986300  | -1.12692500 | 0.26028300  |
| H                                  | 6.94382900  | -1.75284800 | 0.40164900  |
| 15 C                               | 6.19702600  | 0.26925900  | 0.25836600  |
| H                                  | 7.18598600  | 0.71213000  | 0.39594300  |
| C                                  | 5.08174800  | 1.10170000  | 0.08177600  |
| H                                  | 5.18271700  | 2.18934200  | 0.07993500  |
| C                                  | 1.03408300  | 2.94389200  | -0.31610400 |
| 20 C                               | 1.06888100  | 4.36437100  | -0.27333400 |
| H                                  | 2.05500300  | 4.82648000  | -0.30545200 |
| C                                  | -0.08151500 | 5.11528100  | -0.16870100 |
| H                                  | -0.04016200 | 6.20556800  | -0.13175500 |
| C                                  | -1.30521900 | 4.43204400  | -0.08904300 |
| 25 H                               | -2.25042900 | 4.96386300  | 0.02415600  |
| C                                  | -1.30833400 | 3.05234400  | -0.16592000 |
| H                                  | -2.25104000 | 2.51395500  | -0.12044400 |
| C                                  | 0.52716000  | -2.76110700 | -0.67838900 |
| C                                  | 0.30143500  | -4.16375400 | -0.74270600 |
| 30 H                               | 1.14874900  | -4.80293200 | -0.49707100 |
| C                                  | -0.91702000 | -4.68573800 | -1.11712900 |
| H                                  | -1.07538200 | -5.76485500 | -1.16493400 |
| C                                  | -1.94044000 | -3.78690700 | -1.45693500 |
| H                                  | -2.91768200 | -4.13399200 | -1.79374200 |
| 35 C                               | -1.69613700 | -2.42983700 | -1.36491000 |
| H                                  | -2.47373600 | -1.72326400 | -1.64393900 |
| C                                  | -3.24101300 | 0.69234600  | -1.66760000 |
| H                                  | -2.69677700 | 0.98565400  | -2.56559600 |
| C                                  | -4.62687400 | 0.69057500  | -1.62793400 |
| 40 H                               | -5.19063300 | 0.99100300  | -2.51192300 |
| C                                  | -5.27570700 | 0.29550900  | -0.45296000 |
| H                                  | -6.36472200 | 0.27528900  | -0.39251100 |
| C                                  | -4.50175800 | -0.06507700 | 0.64319600  |
| H                                  | -4.98418200 | -0.36399900 | 1.57334000  |
| 45 C                               | -3.10376500 | -0.04084800 | 0.56011000  |
| C                                  | -2.22560300 | -0.36631400 | 1.68941300  |
| C                                  | -2.69075500 | -0.77090600 | 2.94869200  |
| H                                  | -3.75891100 | -0.88149800 | 3.13325600  |
| C                                  | -1.78091800 | -1.03575500 | 3.96653000  |
| 50 H                               | -2.13357500 | -1.35515300 | 4.94861100  |
| C                                  | -0.41470000 | -0.88596600 | 3.71224900  |
| H                                  | 0.32898900  | -1.08158200 | 4.48527100  |
| C                                  | -0.01045000 | -0.48450300 | 2.44475300  |
| H                                  | 1.04544900  | -0.35176200 | 2.19889300  |
| 55                                 |             |             |             |
| <b>TS = [Ru(Bid)(bpy)(H--CO2)]</b> |             |             |             |
| Ru                                 | -0.39165800 | 0.18761400  | -0.35592500 |
| H                                  | -0.04068000 | 0.34579800  | -1.99814900 |
| N                                  | 1.59674400  | 0.07556900  | -0.04651700 |
| 60 N                               | 1.89546900  | -2.33424400 | 0.24138800  |
| N                                  | -0.44755800 | -1.92324400 | -0.41222000 |
| N                                  | 2.22211300  | 2.43127200  | -0.24826400 |
| N                                  | -0.24005800 | 2.27914700  | -0.26200200 |

|      |             |             |              |
|------|-------------|-------------|--------------|
| N    | -2.44334500 | 0.27698200  | -0.524388200 |
| N    | -1.02458100 | 0.01358400  | 1.66516400   |
| C    | 2.31274200  | -1.08787000 | 0.16942900   |
| C    | 3.73785800  | -0.73945200 | 0.31068800   |
| 5 C  | 3.83685100  | 0.64806300  | 0.13879700   |
| C    | 2.46892400  | 1.15042700  | -0.08050700  |
| C    | 4.86390000  | -1.51794800 | 0.54761100   |
| H    | 4.78233000  | -2.59915600 | 0.67960900   |
| C    | 6.10652200  | -0.87046500 | 0.61208800   |
| 10 H | 7.01146600  | -1.45344400 | 0.79883700   |
| C    | 6.20538600  | 0.51810600  | 0.43880600   |
| H    | 7.18545400  | 0.99734900  | 0.49182200   |
| C    | 5.06357900  | 1.29686100  | 0.19943400   |
| H    | 5.13415300  | 2.37828600  | 0.06315900   |
| 15 C | 0.96274800  | 2.98117000  | -0.31596400  |
| C    | 0.96187100  | 4.39920600  | -0.39794400  |
| H    | 1.93605200  | 4.88201300  | -0.46607600  |
| C    | -0.20836600 | 5.12629800  | -0.36290900  |
| H    | -0.19432500 | 6.21643700  | -0.41879000  |
| 20 C | -1.41454100 | 4.42234900  | -0.23106800  |
| H    | -2.37342000 | 4.93772000  | -0.16983200  |
| C    | -1.38238800 | 3.04082000  | -0.18708500  |
| H    | -2.31189600 | 2.48543300  | -0.09695300  |
| C    | 0.60910100  | -2.74277400 | -0.02120400  |
| 25 C | 0.42229100  | -4.14794300 | 0.08677500   |
| H    | 1.28542400  | -4.72896800 | 0.40919800   |
| C    | -0.78007600 | -4.74491600 | -0.22255700  |
| H    | -0.90801700 | -5.82589800 | -0.13934100  |
| C    | -1.82697100 | -3.92357200 | -0.66814700  |
| 30 H | -2.79389800 | -4.33549900 | -0.95770400  |
| C    | -1.61954400 | -2.55922500 | -0.74542700  |
| H    | -2.41748400 | -1.91505000 | -1.10591200  |
| C    | -3.13165000 | 0.48821200  | -1.68509100  |
| H    | -2.51427600 | 0.64604100  | -2.57028800  |
| 35 C | -4.51742200 | 0.49325900  | -1.75389100  |
| H    | -5.00836600 | 0.66330800  | -2.71271500  |
| C    | -5.25985300 | 0.27530700  | -0.58878100  |
| H    | -6.35049300 | 0.26781400  | -0.61246900  |
| C    | -4.58044200 | 0.07445200  | 0.60762200   |
| 40 H | -5.13775800 | -0.08490800 | 1.53034000   |
| C    | -3.18126100 | 0.08317900  | 0.62928200   |
| C    | -2.38409500 | -0.08328500 | 1.84784700   |
| C    | -2.92936400 | -0.31115100 | 3.11821600   |
| H    | -4.00841900 | -0.39364800 | 3.24650100   |
| 45 C | -2.08659500 | -0.43993500 | 4.21696800   |
| H    | -2.50225000 | -0.62092200 | 5.20950000   |
| C    | -0.70558100 | -0.33567300 | 4.02951700   |
| H    | -0.01282800 | -0.43162400 | 4.86592500   |
| C    | -0.21651700 | -0.11215000 | 2.74801200   |
| 50 H | 0.85346400  | -0.02557000 | 2.54962000   |
| C    | 0.26912200  | -0.94152300 | -3.06393600  |
| O    | 1.44673200  | -1.10171000 | -2.97433000  |
| O    | -0.80546000 | -1.15236900 | -3.53657400  |

55 **[Ru(Bid)(bpy)(H-CD<sub>2</sub>)]**

|      |             |             |             |
|------|-------------|-------------|-------------|
| Ru   | -0.44716500 | 0.08920700  | -0.32607200 |
| N    | 1.54498300  | -0.05663100 | -0.02075400 |
| N    | 1.86491400  | -2.47481400 | -0.17800700 |
| N    | -0.48443800 | -1.98075100 | -0.74857400 |
| 60 N | 2.15829600  | 2.29958100  | 0.20567400  |
| N    | -0.30045400 | 2.15822700  | 0.06025800  |
| N    | -2.49389600 | 0.19813900  | -0.49894900 |
| N    | -1.02328200 | -0.32071800 | 1.57570000  |

|      |             |             |             |
|------|-------------|-------------|-------------|
| C    | 2.26855700  | -1.23586000 | -0.01309000 |
| C    | 3.68779400  | -0.91011600 | 0.21726800  |
| C    | 3.77607900  | 0.48433300  | 0.30926900  |
| C    | 2.40863400  | 1.01243900  | 0.15781400  |
| 5 C  | 4.81631400  | -1.71265200 | 0.32468300  |
| H    | 4.74311100  | -2.79975900 | 0.24925200  |
| C    | 6.05083300  | -1.08054800 | 0.53190300  |
| H    | 6.95797100  | -1.68207700 | 0.62225800  |
| C    | 6.13905400  | 0.31671300  | 0.62276800  |
| 10 H | 7.11352800  | 0.78397400  | 0.78054900  |
| C    | 4.99465700  | 1.11910300  | 0.51089100  |
| H    | 5.05715200  | 2.20739700  | 0.57720700  |
| C    | 0.89862100  | 2.85548300  | 0.16144700  |
| C    | 0.89885000  | 4.27064100  | 0.26565000  |
| 15 H | 1.87340700  | 4.75360200  | 0.32199400  |
| C    | -0.27430400 | 4.99282400  | 0.30952400  |
| H    | -0.26056500 | 6.08136400  | 0.38965900  |
| C    | -1.48282800 | 4.28501200  | 0.26340300  |
| H    | -2.44587100 | 4.79333200  | 0.31395200  |
| 20 C | -1.44772400 | 2.90789100  | 0.14283600  |
| H    | -2.38012100 | 2.35284000  | 0.10204200  |
| C    | 0.58494600  | -2.84178600 | -0.52636600 |
| C    | 0.42286400  | -4.24193700 | -0.70062200 |
| H    | 1.29602000  | -4.86034700 | -0.49738100 |
| 25 C | -0.77075500 | -4.78563200 | -1.12297900 |
| H    | -0.88015300 | -5.86359500 | -1.25562000 |
| C    | -1.83201900 | -3.91128000 | -1.39554300 |
| H    | -2.79362300 | -4.27379800 | -1.75910500 |
| C    | -1.64763800 | -2.55506400 | -1.19937900 |
| 30 H | -2.45922500 | -1.86728500 | -1.42056000 |
| C    | -3.18560400 | 0.55643300  | -1.61724900 |
| H    | -2.57329800 | 0.84067100  | -2.47546700 |
| C    | -4.57283000 | 0.56022600  | -1.67055400 |
| H    | -5.07630000 | 0.85289200  | -2.59235800 |
| 35 C | -5.29983300 | 0.18216600  | -0.53735600 |
| H    | -6.39050300 | 0.16782800  | -0.55347900 |
| C    | -4.61073300 | -0.16876000 | 0.61899400  |
| H    | -5.15810600 | -0.45406900 | 1.51714600  |
| C    | -3.21227500 | -0.14801300 | 0.62579700  |
| 40 C | -2.38142300 | -0.44538300 | 1.79125700  |
| C    | -2.87814200 | -0.80239000 | 3.04929800  |
| H    | -3.95296300 | -0.90079000 | 3.19958800  |
| C    | -2.00051500 | -1.02909000 | 4.10374900  |
| H    | -2.38179100 | -1.31055800 | 5.08615500  |
| 45 C | -0.62821600 | -0.88683000 | 3.88344000  |
| H    | 0.09325700  | -1.04937200 | 4.68428000  |
| C    | -0.17608800 | -0.53549800 | 2.61862700  |
| H    | 0.88509200  | -0.41401600 | 2.40192600  |
| C    | 0.53115700  | 0.84142200  | -2.79031100 |
| 50 H | -0.27290500 | 0.24081300  | -2.15807100 |
| O    | 0.15269700  | 1.98495000  | -3.08942200 |
| O    | 1.51651500  | 0.15899200  | -3.10623700 |

**[Ru(Bid)(bpy)(O-COH)]**

|       |             |             |             |
|-------|-------------|-------------|-------------|
| 55 Ru | -0.42608800 | 0.07089000  | -0.28802600 |
| N     | 1.55704700  | 0.03214200  | 0.09315400  |
| N     | 1.99038000  | -2.37641700 | 0.11400600  |
| N     | -0.40799500 | -2.05477200 | -0.37227500 |
| N     | 2.07073900  | 2.42335800  | 0.11774900  |
| 60 N  | -0.37230800 | 2.17217000  | -0.13921600 |
| N     | -2.43418400 | 0.10841300  | -0.67706600 |
| N     | -1.16563300 | -0.10951800 | 1.54105100  |
| C     | 2.33696700  | -1.11243300 | 0.16964700  |

|      |             |             |             |
|------|-------------|-------------|-------------|
| C    | 3.74444400  | -0.70558800 | 0.33241000  |
| C    | 3.76900300  | 0.69417200  | 0.32226800  |
| C    | 2.37620500  | 1.14788300  | 0.16387000  |
| C    | 4.91240000  | -1.44642900 | 0.46255100  |
| 5 H  | 4.88826600  | -2.53835500 | 0.46488300  |
| C    | 6.12048500  | -0.74575300 | 0.58824800  |
| H    | 7.05724100  | -1.29748500 | 0.69344300  |
| C    | 6.14472900  | 0.65716100  | 0.57879500  |
| H    | 7.09976400  | 1.17797700  | 0.67686100  |
| 10 C | 4.96129500  | 1.39671300  | 0.44356400  |
| H    | 4.97363500  | 2.48878800  | 0.43208300  |
| C    | 0.79259400  | 2.92069900  | 0.00827900  |
| C    | 0.73205200  | 4.33797400  | 0.07239200  |
| H    | 1.68304800  | 4.85882700  | 0.17528300  |
| 15 C | -0.46645600 | 5.01575400  | 0.02319400  |
| H    | -0.49834600 | 6.10542000  | 0.07869800  |
| C    | -1.64148100 | 4.26073800  | -0.09246900 |
| H    | -2.62360500 | 4.73242800  | -0.13004800 |
| C    | -1.54862100 | 2.88351900  | -0.16749600 |
| 20 H | -2.45694400 | 2.29711100  | -0.26730900 |
| C    | 0.71319500  | -2.83625000 | -0.11485900 |
| C    | 0.61322600  | -4.25258700 | -0.10523800 |
| H    | 1.53042600  | -4.80234800 | 0.10118000  |
| C    | -0.57949700 | -4.89621800 | -0.35457200 |
| 25 H | -0.64126600 | -5.98604600 | -0.34794300 |
| C    | -1.70541100 | -4.10803400 | -0.62753800 |
| H    | -2.67562600 | -4.55292100 | -0.84957600 |
| C    | -1.57544000 | -2.73114900 | -0.62484500 |
| H    | -2.44054000 | -2.11666300 | -0.85628800 |
| 30 C | -2.99620500 | 0.25091500  | -1.90749200 |
| H    | -2.28969200 | 0.34507000  | -2.73487300 |
| C    | -4.37210400 | 0.27069900  | -2.09836900 |
| H    | -4.77509900 | 0.38677200  | -3.10473000 |
| C    | -5.21759400 | 0.13917000  | -0.99172600 |
| 35 H | -6.30125800 | 0.15087000  | -1.11552500 |
| C    | -4.65762400 | -0.00699700 | 0.27420900  |
| H    | -5.29613000 | -0.10878100 | 1.15169200  |
| C    | -3.26746700 | -0.01929300 | 0.41378600  |
| C    | -2.54399800 | -0.15802000 | 1.67196600  |
| 40 C | -3.14077300 | -0.33071500 | 2.92424800  |
| H    | -4.22757500 | -0.36946600 | 2.99995300  |
| C    | -2.35002900 | -0.45801500 | 4.06045200  |
| H    | -2.80962900 | -0.59615300 | 5.03985600  |
| C    | -0.95962000 | -0.40918800 | 3.92277000  |
| 45 H | -0.30249700 | -0.50782500 | 4.78689500  |
| C    | -0.40198900 | -0.23702300 | 2.66410900  |
| H    | 0.67584600  | -0.19603700 | 2.51103300  |
| C    | 1.04755300  | -0.00151400 | -3.50834800 |
| H    | 1.52529100  | 0.17584800  | -4.50749900 |
| 50 O | 0.45101000  | 0.99413000  | -3.01060200 |
| O    | 1.16739400  | -1.15099800 | -3.02560500 |

**TS = [Ru(Bid)(bpy)(O--COH)]**

|      |             |             |             |
|------|-------------|-------------|-------------|
| Ru   | -0.42608800 | 0.07089000  | -0.28802600 |
| 55 N | 1.55704700  | 0.03214200  | 0.09315400  |
| N    | 1.99038000  | -2.37641700 | 0.11400600  |
| N    | -0.40799500 | -2.05477200 | -0.37227500 |
| N    | 2.07073900  | 2.42335800  | 0.11774900  |
| N    | -0.37230800 | 2.17217000  | -0.13921600 |
| 60 N | -2.43418400 | 0.10841300  | -0.67706600 |
| N    | -1.16563300 | -0.10951800 | 1.54105100  |
| C    | 2.33696700  | -1.11243300 | 0.16964700  |
| C    | 3.74444400  | -0.70558800 | 0.33241000  |

|      |             |             |             |
|------|-------------|-------------|-------------|
| C    | 3.76900300  | 0.69417200  | 0.32226800  |
| C    | 2.37620500  | 1.14788300  | 0.16387000  |
| C    | 4.91240000  | -1.44642900 | 0.46255100  |
| H    | 4.88826600  | -2.53835500 | 0.46488300  |
| 5 C  | 6.12048500  | -0.74575300 | 0.58824800  |
| H    | 7.05724100  | -1.29748500 | 0.69344300  |
| C    | 6.14472900  | 0.65716100  | 0.57879500  |
| H    | 7.09976400  | 1.17797700  | 0.67686100  |
| C    | 4.96129500  | 1.39671300  | 0.44356400  |
| 10 H | 4.97363500  | 2.48878800  | 0.43208300  |
| C    | 0.79259400  | 2.92069900  | 0.00827900  |
| C    | 0.73205200  | 4.33797400  | 0.07239200  |
| H    | 1.68304800  | 4.85882700  | 0.17528300  |
| C    | -0.46645600 | 5.01575400  | 0.02319400  |
| 15 H | -0.49834600 | 6.10542000  | 0.07869800  |
| C    | -1.64148100 | 4.26073800  | -0.09246900 |
| H    | -2.62360500 | 4.73242800  | -0.13004800 |
| C    | -1.54862100 | 2.88351900  | -0.16749600 |
| H    | -2.45694400 | 2.29711000  | -0.26730900 |
| 20 C | 0.71319500  | -2.83625000 | -0.11485900 |
| C    | 0.61322600  | -4.25258700 | -0.10523800 |
| H    | 1.53042600  | -4.80234800 | 0.10118000  |
| C    | -0.57949700 | -4.89621800 | -0.35457200 |
| H    | -0.64126600 | -5.98604600 | -0.34794300 |
| 25 C | -1.70541100 | -4.10803400 | -0.62753800 |
| H    | -2.67562600 | -4.55292100 | -0.84957600 |
| C    | -1.57544000 | -2.73114900 | -0.62484500 |
| H    | -2.44054000 | -2.11666300 | -0.85628800 |
| C    | -2.99620500 | 0.25091500  | -1.90749200 |
| 30 H | -2.28969200 | 0.34507000  | -2.73487300 |
| C    | -4.37210400 | 0.27069900  | -2.09836900 |
| H    | -4.77509900 | 0.38677200  | -3.10473000 |
| C    | -5.21759400 | 0.13917000  | -0.99172600 |
| H    | -6.30125800 | 0.15087000  | -1.11552500 |
| 35 C | -4.65762400 | -0.00699700 | 0.27420900  |
| H    | -5.29613000 | -0.10878100 | 1.15169200  |
| C    | -3.26746700 | -0.01929300 | 0.41378600  |
| C    | -2.54399800 | -0.15802000 | 1.67196600  |
| C    | -3.14077300 | -0.33071500 | 2.92424800  |
| 40 H | -4.22757500 | -0.36946600 | 2.99995300  |
| C    | -2.35002900 | -0.45801500 | 4.06045200  |
| H    | -2.80962900 | -0.59615300 | 5.03985600  |
| C    | -0.95962000 | -0.40918800 | 3.92277000  |
| H    | -0.30249700 | -0.50782500 | 4.78689500  |
| 45 C | -0.40198900 | -0.23702300 | 2.66410900  |
| H    | 0.67584600  | -0.19603700 | 2.51110300  |
| C    | 1.04755300  | -0.00151400 | -3.50834800 |
| H    | 1.52529100  | 0.17584800  | -4.50749900 |
| O    | 0.45101000  | 0.99413000  | -3.01060200 |
| 50 O | 1.16739400  | -1.15099800 | -3.02560500 |

**TS = [Ru(Bid)(bpy)(H--H--DCDH)]**

|      |             |             |             |
|------|-------------|-------------|-------------|
| Ru   | 0.42327000  | 0.14980400  | -0.38167200 |
| N    | -1.59014800 | 0.09249900  | -0.19180400 |
| 55 N | -2.16952000 | 2.41747400  | -0.68747400 |
| N    | 0.28993500  | 2.22695900  | -0.73751500 |
| N    | -1.93705000 | -2.22945000 | 0.49725900  |
| N    | 0.45636700  | -1.93786900 | -0.02566100 |
| N    | 2.49217300  | 0.21833100  | -0.34944700 |
| 60 N | 0.81476200  | 0.43883200  | 1.64560700  |
| C    | -2.43714400 | 1.17632000  | -0.34905100 |
| C    | -3.81091500 | 0.74562600  | -0.03231700 |
| C    | -3.74066100 | -0.60445400 | 0.33309900  |

---

|      |             |             |             |
|------|-------------|-------------|-------------|
| C    | -2.32635000 | -1.00622400 | 0.22086900  |
| C    | -5.01942300 | 1.43023700  | -0.03603900 |
| H    | -5.06759700 | 2.48329500  | -0.32182400 |
| C    | -6.17230100 | 0.72507000  | 0.33873400  |
| 5 H  | -7.13867500 | 1.23395900  | 0.34662500  |
| C    | -6.10217100 | -0.62761300 | 0.70426500  |
| H    | -7.01492200 | -1.15387000 | 0.99234800  |
| C    | -4.87749200 | -1.31124100 | 0.70405800  |
| H    | -4.81732300 | -2.36466900 | 0.98616400  |
| 10 C | -0.64928300 | -2.69235800 | 0.35045200  |
| C    | -0.52049500 | -4.08633800 | 0.58909900  |
| H    | -1.42708100 | -4.61473900 | 0.88075700  |
| C    | 0.68398000  | -4.73822500 | 0.43713000  |
| H    | 0.76676400  | -5.81253900 | 0.61264500  |
| 15 C | 1.79492200  | -3.98029300 | 0.04285200  |
| H    | 2.77499700  | -4.43434400 | -0.10446600 |
| C    | 1.63741600  | -2.62212200 | -0.16682000 |
| H    | 2.48946100  | -2.03145900 | -0.48956200 |
| C    | -0.90590900 | 2.92511800  | -0.88192300 |
| 20 C | -0.89480800 | 4.30547000  | -1.21840700 |
| H    | -1.86629700 | 4.78449400  | -1.33339000 |
| C    | 0.28265900  | 5.00445400  | -1.37198700 |
| H    | 0.27657400  | 6.06591500  | -1.62684900 |
| C    | 1.48633300  | 4.31207100  | -1.17781600 |
| 25 H | 2.45297700  | 4.80804900  | -1.26824400 |
| C    | 1.44124700  | 2.96436200  | -0.87163500 |
| H    | 2.36935300  | 2.41775900  | -0.73255100 |
| C    | 3.31393400  | 0.16046300  | -1.43763100 |
| H    | 2.80815900  | 0.11547600  | -2.40237000 |
| 30 C | 4.69828100  | 0.15651200  | -1.34064000 |
| H    | 5.30085200  | 0.10452000  | -2.24797000 |
| C    | 5.29317800  | 0.21782100  | -0.07672700 |
| H    | 6.37855800  | 0.21077000  | 0.03184000  |
| C    | 4.47487900  | 0.29715900  | 1.04455800  |
| 35 H | 4.91651900  | 0.36099800  | 2.03874400  |
| C    | 3.08334700  | 0.30169800  | 0.89521900  |
| C    | 2.14239600  | 0.42185700  | 2.01008600  |
| C    | 2.52522000  | 0.53566200  | 3.35186200  |
| H    | 3.58011800  | 0.51081800  | 3.62294600  |
| 40 C | 1.55529200  | 0.67969200  | 4.33771600  |
| H    | 1.84525200  | 0.76562200  | 5.38590700  |
| C    | 0.20997800  | 0.71604000  | 3.96305200  |
| H    | -0.58082700 | 0.83360600  | 4.70429500  |
| C    | -0.11975100 | 0.59330800  | 2.61920600  |
| 45 H | -1.15691900 | 0.61374500  | 2.28262200  |
| H    | 0.55236400  | -0.73737600 | -2.38774400 |
| H    | 0.11196700  | 0.03130900  | -2.08024400 |
| C    | 0.23001000  | -2.71053400 | -3.12527500 |
| H    | 0.66215000  | -3.64596800 | -3.54994800 |
| 50 O | 1.07710200  | -1.73994500 | -3.07782700 |
| O    | -0.95137400 | -2.69273000 | -2.76452800 |

55

## 7.4 Optimized geometries for catalytic system of 1d

### [Ru(Bid)(4,4'-OMe<sub>2</sub>Bpy)(Cl)]

|      |             |             |             |
|------|-------------|-------------|-------------|
| Ru   | -0.02289800 | -0.50503000 | -0.50550900 |
| 60 N | -2.01832600 | -0.29373800 | -0.37272600 |
| N    | -2.35413400 | 1.76272900  | -1.65274200 |
| N    | 0.01510700  | 1.10488400  | -1.85705200 |
| N    | -2.59637200 | -2.22233300 | 1.01484400  |

---

|       |             |             |             |
|-------|-------------|-------------|-------------|
| N     | -0.13808500 | -2.12577100 | 0.82338200  |
| N     | 2.06146200  | -0.57452500 | -0.50309100 |
| N     | 0.42786700  | 0.81540800  | 0.98963600  |
| C     | -2.75124900 | 0.74289200  | -0.92184900 |
| 5 C   | -4.16505000 | 0.56478000  | -0.54552700 |
| C     | -4.23858400 | -0.60844700 | 0.21822400  |
| C     | -2.86615900 | -1.13515900 | 0.32658200  |
| C     | -5.30088800 | 1.31408800  | -0.82594300 |
| H     | -5.23868200 | 2.22706100  | -1.42238600 |
| 10 C  | -6.52743500 | 0.86044300  | -0.31900300 |
| H     | -7.43891900 | 1.42754800  | -0.52068300 |
| C     | -6.60130300 | -0.31477200 | 0.44381500  |
| H     | -7.56944600 | -0.64760200 | 0.82459600  |
| C     | -5.44987300 | -1.06579700 | 0.72206600  |
| 15 H  | -5.50177300 | -1.98189900 | 1.31473900  |
| C     | -1.33052200 | -2.70897800 | 1.24569100  |
| C     | -1.31247100 | -3.89521600 | 2.02828400  |
| H     | -2.28163400 | -4.30483500 | 2.31049500  |
| C     | -0.13163600 | -4.48537500 | 2.42289400  |
| 20 C  | 1.06896600  | -3.87061900 | 2.03768400  |
| H     | 2.03823300  | -4.27501000 | 2.33059700  |
| C     | 1.01668600  | -2.72735800 | 1.26185200  |
| H     | 1.94133600  | -2.25062700 | 0.95007200  |
| C     | -1.06974100 | 1.93989800  | -2.11200600 |
| 25 C  | -0.91563700 | 3.08143400  | -2.94522700 |
| H     | -1.80107600 | 3.69924900  | -3.09034500 |
| C     | 0.28456800  | 3.37702400  | -3.55386000 |
| C     | 1.36196500  | 2.50427500  | -3.33964600 |
| H     | 2.33011000  | 2.66344500  | -3.81523700 |
| 30 C  | 1.18368700  | 1.41314900  | -2.50929500 |
| H     | 2.00680900  | 0.72211200  | -2.34883900 |
| C     | 2.85706600  | -1.35582100 | -1.28145200 |
| H     | 2.32181300  | -2.02873100 | -1.95559100 |
| C     | 4.24258900  | -1.31920000 | -1.25187100 |
| 35 H  | 4.80845900  | -1.97612000 | -1.90859800 |
| C     | 4.87505400  | -0.42453400 | -0.36911900 |
| C     | 4.07214500  | 0.38383200  | 0.44932100  |
| H     | 4.56054900  | 1.07193900  | 1.13799500  |
| C     | 2.68783300  | 0.29079600  | 0.37103000  |
| 40 C  | 1.76970000  | 1.07281700  | 1.20608000  |
| C     | 2.19085700  | 1.99687800  | 2.15388600  |
| H     | 3.24875300  | 2.19429200  | 2.31756600  |
| C     | 1.25017600  | 2.69998900  | 2.92006600  |
| C     | -0.11450800 | 2.43605600  | 2.70529300  |
| 45 H  | -0.89536500 | 2.94288800  | 3.26742300  |
| C     | -0.47049300 | 1.50098700  | 1.74631700  |
| H     | -1.51984900 | 1.27192600  | 1.55914000  |
| H     | 0.38813600  | 4.25437200  | -4.19513500 |
| H     | -0.13212600 | -5.39621500 | 3.02473000  |
| 50 O  | 6.21828300  | -0.26579200 | -0.22618500 |
| O     | 1.75501200  | 3.58776500  | 3.81732600  |
| C     | 7.04231500  | -1.10198000 | -1.08048600 |
| H     | 8.07461900  | -0.84052300 | -0.82279900 |
| H     | 6.86709700  | -2.17781800 | -0.86539600 |
| 55 H  | 6.85160400  | -0.89706200 | -2.14584200 |
| C     | 0.76424500  | 4.33008700  | 4.58502100  |
| H     | 0.14945800  | 3.64993000  | 5.19818100  |
| H     | 1.35527400  | 4.98840200  | 5.23454800  |
| H     | 0.12335100  | 4.93317300  | 3.91992000  |
| 60 Cl | -0.34011700 | -2.10697700 | -2.38909300 |

**[Ru(Bid)(4,4'-OMe<sub>2</sub>Bpy)]<sup>+</sup>**

Ru 0.04510600 0.35636100 -0.73709400

---

---

|      |             |             |             |
|------|-------------|-------------|-------------|
| N    | 2.05194600  | 0.25310400  | -0.60537800 |
| N    | 2.45285300  | -2.07299000 | -1.25258300 |
| N    | 0.04074700  | -1.61580000 | -1.50680100 |
| N    | 2.58498300  | 2.50594800  | 0.18701000  |
| 5 N  | 0.13079400  | 2.33180100  | -0.02370100 |
| N    | -2.03793200 | 0.43672200  | -0.82796800 |
| N    | -0.46140300 | -0.39240200 | 1.03567200  |
| C    | 2.81952000  | -0.87825600 | -0.85252700 |
| C    | 4.22910300  | -0.55358300 | -0.57502100 |
| 10 C | 4.26816600  | 0.78450500  | -0.16289300 |
| C    | 2.88208700  | 1.28081200  | -0.17661900 |
| C    | 5.38805600  | -1.31526000 | -0.66250400 |
| H    | 5.35267300  | -2.35797000 | -0.98543400 |
| C    | 6.60116200  | -0.70144500 | -0.32110600 |
| 15 H | 7.53054500  | -1.27249700 | -0.37578400 |
| C    | 6.64004400  | 0.63948400  | 0.09155200  |
| H    | 7.59889700  | 1.09284200  | 0.35218200  |
| C    | 5.46648600  | 1.40136100  | 0.17491700  |
| H    | 5.48990800  | 2.44493500  | 0.49604000  |
| 20 C | 1.31120700  | 3.01836700  | 0.26037900  |
| C    | 1.27144700  | 4.36922100  | 0.69859400  |
| H    | 2.23262300  | 4.84630100  | 0.88544100  |
| C    | 0.08072300  | 5.03203800  | 0.89676900  |
| C    | -1.10831300 | 4.32782300  | 0.65752300  |
| 25 H | -2.08512100 | 4.78749200  | 0.81019800  |
| C    | -1.03763100 | 3.02162000  | 0.21410200  |
| H    | -1.95515900 | 2.47537700  | 0.02019500  |
| C    | 1.16527600  | -2.43466600 | -1.57454100 |
| C    | 1.05232000  | -3.77466300 | -2.03215700 |
| 30 H | 1.97199300  | -4.35745100 | -2.05792100 |
| C    | -0.15542200 | -4.30477200 | -2.42910400 |
| C    | -1.28605500 | -3.47708000 | -2.37213400 |
| H    | -2.26963900 | -3.83033200 | -2.68259500 |
| C    | -1.14534800 | -2.18086400 | -1.91496900 |
| 35 H | -2.01349600 | -1.52972900 | -1.87973300 |
| C    | -2.78750000 | 0.92246100  | -1.85067100 |
| H    | -2.22526800 | 1.31685200  | -2.69939300 |
| C    | -4.17388000 | 0.93080100  | -1.84906700 |
| H    | -4.70676500 | 1.33570100  | -2.70607500 |
| 40 C | -4.85101800 | 0.40918900  | -0.73047000 |
| C    | -4.09040500 | -0.09224100 | 0.33850700  |
| H    | -4.60985000 | -0.49353300 | 1.20727700  |
| C    | -2.70533900 | -0.06680700 | 0.26708100  |
| C    | -1.80942200 | -0.55843600 | 1.31377900  |
| 45 C | -2.23773100 | -1.15598200 | 2.48973100  |
| H    | -3.29821300 | -1.28943700 | 2.69925300  |
| C    | -1.30286400 | -1.61537500 | 3.42928900  |
| C    | 0.06457900  | -1.43731400 | 3.15073100  |
| H    | 0.83936000  | -1.76461800 | 3.83960000  |
| 50 C | 0.43561000  | -0.83171000 | 1.96235200  |
| H    | 1.48658600  | -0.68112700 | 1.71899900  |
| H    | -0.22747900 | -5.33504800 | -2.78223600 |
| H    | 0.06429600  | 6.06783900  | 1.24047900  |
| O    | -6.19829800 | 0.34304500  | -0.58137400 |
| 55 O | -1.81482100 | -2.20490000 | 4.53821200  |
| C    | -6.98083900 | 0.84317600  | -1.70525500 |
| H    | -8.02486600 | 0.70075700  | -1.39886200 |
| H    | -6.78107500 | 1.91387700  | -1.87830200 |
| H    | -6.77175900 | 0.25974600  | -2.61742500 |
| 60 C | -0.83222600 | -2.71718500 | 5.48636300  |
| H    | -0.21230000 | -1.89935900 | 5.88940600  |
| H    | -1.43204900 | -3.16548400 | 6.28835500  |
| H    | -0.19820900 | -3.48618700 | 5.01422500  |

---



**[Ru(Bid)(4,4'-OMe<sub>2</sub>Bpy)(H<sub>2</sub>)<sup>+</sup>**

|      |             |             |             |
|------|-------------|-------------|-------------|
| Ru   | -0.02019200 | 0.07708000  | -0.96118000 |
| N    | 1.99783300  | 0.05687700  | -0.73526200 |
| 5 N  | 2.44306200  | -2.34815300 | -0.76306700 |
| N    | 0.02106900  | -2.03338000 | -1.12799200 |
| N    | 2.45496100  | 2.44231200  | -0.44727200 |
| N    | 0.02758500  | 2.18768800  | -0.82384800 |
| N    | -2.11901100 | 0.06944800  | -0.82692000 |
| 10 N | -0.32985200 | -0.08284000 | 1.09229400  |
| C    | 2.77919300  | -1.08457300 | -0.66048000 |
| C    | 4.16997100  | -0.67254600 | -0.39708700 |
| C    | 4.17331100  | 0.72459700  | -0.30309300 |
| C    | 2.78452800  | 1.17455700  | -0.50940900 |
| 15 C | 5.33794100  | -1.40915100 | -0.24566300 |
| H    | 5.32931000  | -2.49874700 | -0.31919000 |
| C    | 6.52535100  | -0.70676200 | 0.00258500  |
| H    | 7.46223100  | -1.25455800 | 0.12482800  |
| C    | 6.52873000  | 0.69333500  | 0.09688800  |
| 20 H | 7.46808100  | 1.21564400  | 0.29053000  |
| C    | 5.34469000  | 1.42842900  | -0.05443700 |
| H    | 5.34145400  | 2.51812300  | 0.01816900  |
| C    | 1.17853200  | 2.93683000  | -0.61056300 |
| C    | 1.10926500  | 4.35290300  | -0.54494200 |
| 25 H | 2.04786800  | 4.87817800  | -0.37438700 |
| C    | -0.08420000 | 5.02681200  | -0.69425300 |
| C    | -1.24216200 | 4.27059700  | -0.91623900 |
| H    | -2.21653700 | 4.74121200  | -1.04829300 |
| C    | -1.14043400 | 2.89234300  | -0.97244500 |
| 30 H | -2.02953400 | 2.29664500  | -1.15799100 |
| C    | 1.16518500  | -2.81080700 | -0.99416300 |
| C    | 1.08673900  | -4.22412700 | -1.09893700 |
| H    | 2.01990200  | -4.77284900 | -0.97990600 |
| C    | -0.10843300 | -4.86623600 | -1.34280700 |
| 35 C | -1.25830400 | -4.08018100 | -1.49220400 |
| H    | -2.23295900 | -4.52423000 | -1.69535300 |
| C    | -1.14792600 | -2.70594200 | -1.38063200 |
| H    | -2.03041500 | -2.08532100 | -1.50709500 |
| C    | -3.00460100 | 0.14513000  | -1.85803100 |
| 40 H | -2.56481300 | 0.21672400  | -2.85387800 |
| C    | -4.38045300 | 0.13597200  | -1.69959000 |
| H    | -5.01728500 | 0.19907100  | -2.57858900 |
| C    | -4.90852600 | 0.04441500  | -0.39889500 |
| C    | -4.01102500 | -0.03231600 | 0.67706900  |
| 45 H | -4.41632000 | -0.10355400 | 1.68454300  |
| C    | -2.64233800 | -0.02048700 | 0.44482100  |
| C    | -1.64154500 | -0.10644100 | 1.51655300  |
| C    | -1.96933800 | -0.20923500 | 2.86090100  |
| H    | -3.00523900 | -0.22693300 | 3.19413300  |
| 50 C | -0.95564000 | -0.29880400 | 3.82743500  |
| C    | 0.38140900  | -0.28125100 | 3.39425200  |
| H    | 1.21326900  | -0.34885300 | 4.09115500  |
| C    | 0.64031400  | -0.17199600 | 2.03734000  |
| H    | 1.66762200  | -0.15102800 | 1.67435800  |
| 55 H | 0.55931500  | 0.17605400  | -2.59279900 |
| H    | -0.27836100 | 0.25122800  | -2.67011000 |
| H    | -0.12273500 | 6.11652000  | -0.64410800 |
| H    | -0.15451800 | -5.95395400 | -1.42145400 |
| O    | -6.22593100 | 0.02227100  | -0.07818900 |
| 60 O | -1.37044400 | -0.39832300 | 5.11401200  |
| C    | -0.31011700 | -0.52953200 | 6.10702700  |
| H    | 0.32882800  | 0.36929400  | 6.11851800  |
| H    | -0.83968100 | -0.62675900 | 7.06321200  |

---

|     |             |             |             |
|-----|-------------|-------------|-------------|
| H   | 0.29510800  | -1.43100500 | 5.91565000  |
| C   | -7.14551700 | 0.09268700  | -1.20859500 |
| H   | -8.14382100 | 0.04582100  | -0.75570500 |
| H   | -7.02117100 | 1.04212500  | -1.75535000 |
| 5 H | -6.99725700 | -0.76492700 | -1.88553300 |

**[Ru(Bid)(4,4'-OMe<sub>2</sub>Bpy)(H)]**

|      |             |             |             |
|------|-------------|-------------|-------------|
| Ru   | 0.04412800  | 0.50226800  | -0.80631500 |
| H    | 0.21795700  | 1.23853500  | -2.27408200 |
| 10 N | 2.04167100  | 0.30950600  | -0.65166100 |
| N    | 2.34298100  | -1.99509600 | -1.42292400 |
| N    | -0.02353600 | -1.37671500 | -1.74442100 |
| N    | 2.64421800  | 2.47105300  | 0.32484600  |
| N    | 0.18874000  | 2.38771000  | 0.09899400  |
| 15 N | -2.04329500 | 0.53847700  | -0.71754500 |
| N    | -0.39267500 | -0.50387600 | 1.07277200  |
| C    | 2.75574800  | -0.84273800 | -0.93410600 |
| C    | 4.16610700  | -0.61897100 | -0.57435600 |
| C    | 4.25714600  | 0.68887800  | -0.07586800 |
| 20 C | 2.89906500  | 1.25706200  | -0.11766600 |
| C    | 5.28650900  | -1.43676700 | -0.65941200 |
| H    | 5.21018100  | -2.45469900 | -1.04847400 |
| C    | 6.51581000  | -0.91342500 | -0.23163600 |
| H    | 7.41536900  | -1.53071800 | -0.28678300 |
| 25 C | 6.60697100  | 0.39487400  | 0.26686400  |
| H    | 7.57625400  | 0.77880100  | 0.59301400  |
| C    | 5.47084700  | 1.21345500  | 0.35186200  |
| H    | 5.53600500  | 2.23245700  | 0.74006300  |
| C    | 1.39092900  | 3.02291400  | 0.41965800  |
| 30 C | 1.39001500  | 4.34999400  | 0.93279700  |
| H    | 2.36546200  | 4.78765500  | 1.14313600  |
| C    | 0.22052400  | 5.03789800  | 1.16576400  |
| C    | -0.99046200 | 4.38312400  | 0.88739900  |
| H    | -1.95334600 | 4.86426500  | 1.06241400  |
| 35 C | -0.95652200 | 3.10162900  | 0.37250600  |
| H    | -1.88765500 | 2.59311600  | 0.13941000  |
| C    | 1.05673000  | -2.25746700 | -1.82419700 |
| C    | 0.88593600  | -3.55580900 | -2.38123200 |
| H    | 1.76900700  | -4.19364800 | -2.40087700 |
| 40 C | -0.32479700 | -3.97710800 | -2.88335700 |
| C    | -1.40088100 | -3.07554900 | -2.84240900 |
| H    | -2.38031300 | -3.33608100 | -3.24472500 |
| C    | -1.20734800 | -1.82731600 | -2.28302200 |
| H    | -2.02690900 | -1.11383200 | -2.26576100 |
| 45 C | -2.87373400 | 1.12364500  | -1.62794300 |
| H    | -2.37151700 | 1.64896500  | -2.44109700 |
| C    | -4.25729400 | 1.07691600  | -1.57009000 |
| H    | -4.84081300 | 1.57103000  | -2.34356600 |
| C    | -4.86292200 | 0.38362600  | -0.50697200 |
| 50 C | -4.03188200 | -0.21514400 | 0.44928300  |
| H    | -4.50008000 | -0.74235800 | 1.27843600  |
| C    | -2.64838000 | -0.12708700 | 0.33411600  |
| C    | -1.72855000 | -0.71890200 | 1.32132600  |
| C    | -2.16051600 | -1.43466100 | 2.43362300  |
| 55 H | -3.21601600 | -1.61172800 | 2.63250700  |
| C    | -1.22201800 | -1.95487300 | 3.33724100  |
| C    | 0.14377800  | -1.73056200 | 3.09035700  |
| H    | 0.91775200  | -2.10625300 | 3.75550900  |
| C    | 0.49823100  | -1.01045100 | 1.95854400  |
| 60 H | 1.54964000  | -0.81591200 | 1.73504600  |
| H    | -0.43998200 | -4.97470400 | -3.31166500 |
| H    | 0.23490900  | 6.05519700  | 1.56172700  |
| O    | -6.20278600 | 0.23856000  | -0.31157300 |

|     |             |             |             |
|-----|-------------|-------------|-------------|
| O   | -1.73348900 | -2.64321300 | 4.39371700  |
| C   | -7.04848300 | 0.87578300  | -1.31099000 |
| H   | -8.07392300 | 0.65073500  | -0.99081400 |
| H   | -6.88853800 | 1.96717400  | -1.32385700 |
| 5 H | -6.86568300 | 0.45043400  | -2.31230700 |
| C   | -0.74994900 | -3.16704600 | 5.33166900  |
| H   | -0.16035400 | -2.35043200 | 5.78122700  |
| H   | -1.34572900 | -3.66890600 | 6.10488600  |
| H   | -0.08347100 | -3.89461200 | 4.83839600  |

10

**TS = [Ru(Bid)(4,4'-OMe<sub>2</sub>Bpy)(H-H-NMe<sub>2</sub>)]<sup>+</sup>**

|      |             |             |             |
|------|-------------|-------------|-------------|
| N    | 1.86522300  | -0.01762000 | 0.11519300  |
| N    | 2.43937900  | 0.12527500  | 2.48678700  |
| N    | 0.01991100  | -0.32829300 | 2.31459200  |
| 15 N | 2.13251600  | 0.23235700  | -2.30386800 |
| N    | -0.09767700 | -0.73160400 | -1.87092700 |
| N    | -2.16205400 | -0.73699200 | 0.25111400  |
| N    | -0.75253100 | 1.46757600  | -0.01212500 |
| C    | 2.68971600  | 0.22609200  | 1.20097100  |
| 20 C | 3.99993500  | 0.67656000  | 0.69683800  |
| C    | 3.90289600  | 0.72744000  | -0.70093700 |
| C    | 2.54092000  | 0.28555600  | -1.05322100 |
| C    | 5.17331100  | 1.02972500  | 1.35163000  |
| H    | 5.24300200  | 0.99009000  | 2.44088100  |
| 25 C | 6.26290300  | 1.43782800  | 0.56868700  |
| H    | 7.20042200  | 1.72074100  | 1.05238900  |
| C    | 6.16604300  | 1.48860600  | -0.82997400 |
| H    | 7.02943100  | 1.81088700  | -1.41621600 |
| C    | 4.97761800  | 1.13141300  | -1.48337900 |
| 30 H | 4.89764800  | 1.16963100  | -2.57203000 |
| C    | 0.91674400  | -0.27532500 | -2.70675900 |
| C    | 0.77665500  | -0.36625300 | -4.11737400 |
| H    | 1.59913600  | 0.02489300  | -4.71487500 |
| C    | -0.33029600 | -0.94682800 | -4.69829900 |
| 35 H | -0.42115800 | -1.01884400 | -5.78373500 |
| C    | -1.32470400 | -1.46045900 | -3.85267700 |
| H    | -2.21144800 | -1.95643500 | -4.24788700 |
| C    | -1.17003800 | -1.33115000 | -2.48463200 |
| H    | -1.92781000 | -1.73384300 | -1.81697500 |
| 40 C | 1.20282000  | -0.15129200 | 3.02727300  |
| C    | 1.19807500  | -0.19621900 | 4.44692900  |
| H    | 2.16008300  | -0.06786700 | 4.94157900  |
| C    | 0.03210600  | -0.36945700 | 5.16135900  |
| H    | 0.04152200  | -0.39655200 | 6.25264600  |
| 45 C | -1.16653700 | -0.49178000 | 4.44362900  |
| H    | -2.12561900 | -0.60939200 | 4.94859900  |
| C    | -1.12460700 | -0.46772300 | 3.06157300  |
| H    | -2.04478800 | -0.57276900 | 2.49305400  |
| C    | -2.85026400 | -1.89662100 | 0.43882500  |
| 50 H | -2.23680200 | -2.77522200 | 0.64730500  |
| C    | -4.23021200 | -2.00002600 | 0.37183100  |
| H    | -4.70177800 | -2.96657600 | 0.53249900  |
| C    | -4.97944500 | -0.84305400 | 0.08975600  |
| C    | -4.29115300 | 0.36623400  | -0.08877400 |
| 55 H | -4.87007000 | 1.26532200  | -0.29314500 |
| C    | -2.90479800 | 0.39923500  | -0.00107900 |
| C    | -2.11590400 | 1.63272000  | -0.13951700 |
| C    | -2.68133800 | 2.88297900  | -0.35497600 |
| H    | -3.75703600 | 3.01242900  | -0.46049000 |
| 60 C | -1.86207100 | 4.01976400  | -0.43513800 |
| C    | -0.47405400 | 3.85529100  | -0.28398100 |
| H    | 0.21421400  | 4.69613800  | -0.32494400 |
| C    | 0.02444400  | 2.57757300  | -0.08130300 |

|      |             |             |             |
|------|-------------|-------------|-------------|
| H    | 1.09684800  | 2.41729200  | 0.03833600  |
| H    | 0.89793500  | -2.37801200 | 0.02949800  |
| H    | 0.14355000  | -2.18169700 | 0.51819000  |
| N    | 1.88352400  | -3.35110900 | -0.44471300 |
| 5 Ru | -0.08889100 | -0.50872400 | 0.22209200  |
| C    | 1.21318600  | -4.60956500 | -0.07346300 |
| H    | 0.98893100  | -4.59467200 | 1.00601600  |
| H    | 0.26613400  | -4.69197200 | -0.63290400 |
| H    | 1.84522600  | -5.48890700 | -0.29848500 |
| 10 C | 3.12399000  | -3.17511300 | 0.32962700  |
| H    | 3.63714000  | -2.26156200 | -0.00730600 |
| H    | 2.87370100  | -3.07632900 | 1.39933700  |
| H    | 3.80601000  | -4.03764300 | 0.19899500  |
| C    | 2.14858500  | -3.30943900 | -1.89303300 |
| 15 H | 1.19502900  | -3.36826600 | -2.44249300 |
| H    | 2.65861000  | -2.36733900 | -2.14503300 |
| H    | 2.79207000  | -4.15585100 | -2.20458000 |
| O    | -2.50127600 | 5.19831400  | -0.65050100 |
| O    | -6.33203800 | -0.78310300 | -0.02694800 |
| 20 C | -7.03066300 | -2.04915200 | 0.15706000  |
| H    | -6.87312900 | -2.44046800 | 1.17620800  |
| H    | -8.09010800 | -1.80445800 | 0.00850700  |
| H    | -6.70535300 | -2.78900200 | -0.59341800 |
| C    | -1.64302700 | 6.37595200  | -0.68890900 |
| 25 H | -2.33028600 | 7.21280200  | -0.86709400 |
| H    | -1.12323400 | 6.51195800  | 0.27411100  |
| H    | -0.91336600 | 6.30544300  | -1.51276900 |

**TS = [Ru(Bid)(4,4'-OMe<sub>2</sub>Bpy)(H-CO<sub>2</sub>)]**

|       |             |             |             |
|-------|-------------|-------------|-------------|
| 30 Ru | 0.06194200  | -0.62268600 | 0.19134800  |
| H     | 0.39963400  | -2.05480400 | 1.01558900  |
| N     | 2.04648200  | -0.30197900 | 0.08870100  |
| N     | 2.36500100  | 1.28087500  | 1.92728300  |
| N     | 0.00759800  | 0.55246200  | 1.94269600  |
| 35 N  | 2.64729900  | -1.72485900 | -1.80888300 |
| N     | 0.19150500  | -1.75262700 | -1.57175500 |
| N     | -2.01608300 | -0.78815400 | 0.21771300  |
| N     | -0.56876500 | 1.12586800  | -0.86270200 |
| C     | 2.77036500  | 0.53124600  | 0.92341900  |
| 40 C  | 4.18608500  | 0.48415000  | 0.51837200  |
| C     | 4.27132700  | -0.40667600 | -0.56071300 |
| C     | 2.90467900  | -0.88921600 | -0.82531700 |
| C     | 5.31484600  | 1.12457800  | 1.01445100  |
| H     | 5.24265700  | 1.81726200  | 1.85594700  |
| 45 C  | 6.54643600  | 0.85328900  | 0.40028100  |
| H     | 7.45258400  | 1.34105700  | 0.76650200  |
| C     | 6.63168500  | -0.03838000 | -0.67954200 |
| H     | 7.60301800  | -0.23335200 | -1.13963500 |
| C     | 5.48719400  | -0.68109200 | -1.17436600 |
| 50 H  | 5.54816600  | -1.37676900 | -2.01431900 |
| C     | 1.38806800  | -2.13027600 | -2.18128700 |
| C     | 1.37769600  | -2.98033100 | -3.32078000 |
| H     | 2.34971300  | -3.25229900 | -3.73064400 |
| C     | 0.20188600  | -3.41734400 | -3.88977500 |
| 55 C  | -1.00346100 | -2.99215700 | -3.31005500 |
| H     | -1.97004400 | -3.28667800 | -3.71981400 |
| C     | -0.95978700 | -2.18784900 | -2.18694700 |
| H     | -1.88709800 | -1.86507700 | -1.72303600 |
| C     | 1.08078900  | 1.30851600  | 2.41412400  |
| 60 C  | 0.91112000  | 2.18326000  | 3.52289000  |
| H     | 1.78901800  | 2.75003300  | 3.83088600  |
| C     | -0.29314800 | 2.29445800  | 4.18172700  |
| C     | -1.36118900 | 1.50090700  | 3.73421000  |

|      |             |             |             |
|------|-------------|-------------|-------------|
| H    | -2.33357200 | 1.52070200  | 4.22690200  |
| C    | -1.16808200 | 0.67028700  | 2.64682500  |
| H    | -1.98266500 | 0.03718200  | 2.30625500  |
| C    | -2.72653300 | -1.82401700 | 0.74409600  |
| 5 H  | -2.12769300 | -2.64721600 | 1.13619900  |
| C    | -4.11048900 | -1.86421100 | 0.80694800  |
| H    | -4.59959800 | -2.72910000 | 1.24896900  |
| C    | -4.84030500 | -0.77559900 | 0.296885100 |
| C    | -4.13025900 | 0.29121200  | -0.27294900 |
| 10 H | -4.69457600 | 1.12828800  | -0.68090500 |
| C    | -2.74093100 | 0.26586000  | -0.30774600 |
| C    | -1.92871700 | 1.33746000  | -0.90625200 |
| C    | -2.47136800 | 2.47978500  | -1.48376500 |
| H    | -3.54621900 | 2.64911900  | -1.51709700 |
| 15 C | -1.62569100 | 3.45343700  | -2.03701300 |
| C    | -0.23634200 | 3.23924000  | -1.99299800 |
| H    | 0.47009900  | 3.95651300  | -2.40399200 |
| C    | 0.23342500  | 2.07515400  | -1.40240700 |
| H    | 1.30488400  | 1.87098700  | -1.35109700 |
| 20 C | 0.66796400  | -2.16794400 | 2.70431200  |
| O    | 1.84347900  | -2.00482000 | 2.81053900  |
| O    | -0.41765300 | -2.42871600 | 3.12317200  |
| H    | -0.40824500 | 2.96779900  | 5.03323500  |
| H    | 0.20876400  | -4.06428300 | -4.76922400 |
| 25 O | -6.19598900 | -0.65708300 | 0.30085200  |
| O    | -2.24300200 | 4.53845500  | -2.57641200 |
| C    | -6.91437800 | -1.76242000 | 0.91993600  |
| H    | -7.97208900 | -1.47639900 | 0.85449800  |
| H    | -6.74377500 | -2.70193100 | 0.36774300  |
| 30 H | -6.62056000 | -1.88029200 | 1.97670000  |
| C    | -1.35307000 | 5.55204100  | -3.12694600 |
| H    | -0.75343900 | 5.14061300  | -3.95607700 |
| H    | -2.02474400 | 6.33457300  | -3.50293200 |
| H    | -0.69450100 | 5.96427700  | -2.34406800 |

35 **[Ru(Bid)(4,4'-OMe<sub>2</sub>Bpy)(H-OCOD)]**

|      |             |             |             |
|------|-------------|-------------|-------------|
| Ru   | -0.0102500  | -0.44316000 | -0.36954700 |
| N    | -1.99632400 | -0.14196100 | -0.17059500 |
| N    | -2.35446600 | 1.66928400  | -1.77326700 |
| 40 N | 0.00213700  | 0.95642400  | -1.94631700 |
| N    | -2.56867900 | -1.85839300 | 1.47402700  |
| N    | -0.11725200 | -1.86091600 | 1.18830700  |
| N    | 2.05123400  | -0.64540100 | -0.47984100 |
| N    | 0.61172200  | 1.03189700  | 0.89497500  |
| 45 C | -2.73711700 | 0.79142800  | -0.87340300 |
| C    | -4.14698500 | 0.67490200  | -0.45941400 |
| C    | -4.21286200 | -0.36699100 | 0.47431000  |
| C    | -2.84018900 | -0.87444300 | 0.64839200  |
| C    | -5.28491300 | 1.37392900  | -0.84183600 |
| 50 H | -5.22826100 | 2.18351200  | -1.57279500 |
| C    | -6.50622900 | 1.00400100  | -0.26042000 |
| H    | -7.41998300 | 1.53405600  | -0.53816100 |
| C    | -6.57227600 | -0.04014600 | 0.67431700  |
| H    | -7.53665500 | -0.30974000 | 1.11039500  |
| 55 C | -5.41852700 | -0.74107800 | 1.05380600  |
| H    | -5.46449900 | -1.55563700 | 1.78001200  |
| C    | -1.30402600 | -2.33187100 | 1.74234700  |
| C    | -1.28463500 | -3.38063100 | 2.69935500  |
| H    | -2.25138500 | -3.71024000 | 3.07752300  |
| 60 C | -0.10381200 | -3.94125400 | 3.13508700  |
| H    | -0.10245200 | -4.74603600 | 3.87268900  |
| C    | 1.09391200  | -3.43576700 | 2.61102900  |
| H    | 2.06373100  | -3.82288400 | 2.92439300  |

|      |             |             |             |
|------|-------------|-------------|-------------|
| C    | 1.03934800  | -2.42579800 | 1.66825700  |
| H    | 1.96287200  | -2.03482200 | 1.25262300  |
| C    | -1.08205600 | 1.75894200  | -2.28916800 |
| C    | -0.94357000 | 2.76178400  | -3.28599000 |
| 5 H  | -1.82857600 | 3.36002500  | -3.49864200 |
| C    | 0.24266600  | 2.95512900  | -3.95931000 |
| H    | 0.33327800  | 3.72752600  | -4.72546900 |
| C    | 1.32242900  | 2.18809000  | -3.64177900 |
| H    | 2.28170600  | 2.20355500  | -4.15276800 |
| 10 C | 1.16031000  | 1.16286900  | -2.65632800 |
| H    | 1.98686700  | 0.50254800  | -2.40943600 |
| C    | 2.73514000  | -1.59179300 | -1.17680500 |
| H    | 2.11751600  | -2.31763700 | -1.71040200 |
| C    | 4.11876600  | -1.66112800 | -1.22435700 |
| 15 H | 4.59498700  | -2.44898800 | -1.80317300 |
| C    | 4.86695700  | -0.70246200 | -0.51626900 |
| C    | 4.17755700  | 0.27564800  | 0.21759200  |
| H    | 4.75525500  | 1.01013400  | 0.77679900  |
| C    | 2.78951800  | 0.28230700  | 0.22528500  |
| 20 C | 1.97562100  | 1.23754400  | 0.98513300  |
| C    | 2.50310600  | 2.26704700  | 1.75204600  |
| H    | 3.57751300  | 2.43149100  | 1.81600900  |
| C    | 1.64896300  | 3.12386600  | 2.46317800  |
| C    | 0.26190000  | 2.90770100  | 2.37755800  |
| 25 H | -0.45212600 | 3.53474500  | 2.90570200  |
| C    | -0.20375100 | 1.86682900  | 1.59023200  |
| H    | -1.27238000 | 1.67174500  | 1.49743600  |
| C    | -1.00830500 | -2.54104400 | -1.83545600 |
| H    | -0.23266300 | -1.65088600 | -1.74138000 |
| 30 O | -0.57578700 | -3.61529700 | -1.38723700 |
| O    | -2.03062200 | -2.23525500 | -2.46728400 |
| O    | 6.22278500  | -0.63420800 | -0.46802300 |
| O    | 2.25438600  | 4.10266600  | 3.18241300  |
| C    | 6.92740600  | -1.66545600 | -1.21877100 |
| 35 H | 6.69248500  | -1.59836200 | -2.29425800 |
| H    | 7.99060000  | -1.45028900 | -1.05200900 |
| H    | 6.68003000  | -2.66895800 | -0.83397900 |
| C    | 1.35775700  | 4.97783200  | 3.92769600  |
| H    | 2.02379500  | 5.68976800  | 4.43137800  |
| 40 H | 0.67791900  | 5.51509100  | 3.24557500  |
| H    | 0.78220100  | 4.40532300  | 4.67412500  |

**[Ru(Bid)(4,4'-DMe<sub>2</sub>Bpy)(O-COH)]**

|      |             |             |             |
|------|-------------|-------------|-------------|
| Ru   | -0.00745500 | -0.55284500 | -0.32797300 |
| 45 N | -1.99001500 | -0.26679700 | -0.18384100 |
| N    | -2.26549800 | 1.69727100  | -1.61197200 |
| N    | 0.05050500  | 0.87827100  | -1.85575100 |
| N    | -2.60926100 | -2.07520600 | 1.33823400  |
| N    | -0.14741300 | -1.99527400 | 1.18812000  |
| 50 N | 2.06244100  | -0.69980600 | -0.38081800 |
| N    | 0.54032100  | 0.94074500  | 0.96122000  |
| C    | -2.69319800 | 0.75283100  | -0.80186600 |
| C    | -4.10945900 | 0.64121900  | -0.41097500 |
| C    | -4.21447200 | -0.47877900 | 0.42697400  |
| 55 C | -2.85688500 | -1.03411900 | 0.57176000  |
| C    | -5.22481300 | 1.40154300  | -0.73980300 |
| H    | -5.13779400 | 2.27140600  | -1.39452700 |
| C    | -6.46272400 | 1.01597300  | -0.20491800 |
| H    | -7.35849100 | 1.59401900  | -0.44275800 |
| 60 C | -6.56799400 | -0.10517600 | 0.63175000  |
| H    | -7.54444200 | -0.38633600 | 1.03237700  |
| C    | -5.43738900 | -0.86847500 | 0.95836900  |
| H    | -5.51458800 | -1.74294800 | 1.60834600  |

---

|                                                            |             |             |             |
|------------------------------------------------------------|-------------|-------------|-------------|
| C                                                          | -1.34913500 | -2.54133000 | 1.63535900  |
| C                                                          | -1.34336600 | -3.64588400 | 2.52939300  |
| H                                                          | -2.31606400 | -4.03886700 | 2.82303600  |
| C                                                          | -0.16908700 | -4.17321500 | 3.02123600  |
| 5 C                                                        | 1.03748800  | -3.57728200 | 2.62380100  |
| H                                                          | 1.99934900  | -3.92980800 | 2.99713800  |
| C                                                          | 0.99964900  | -2.52310200 | 1.73007000  |
| H                                                          | 1.92678100  | -2.05681200 | 1.40817900  |
| C                                                          | -0.99198500 | 1.76174900  | -2.12965400 |
| 10 C                                                       | -0.80720800 | 2.81484900  | -3.06482400 |
| H                                                          | -1.65380900 | 3.48296300  | -3.21832400 |
| C                                                          | 0.37012200  | 2.96255200  | -3.76655700 |
| C                                                          | 1.39146500  | 2.02772700  | -3.54226200 |
| H                                                          | 2.33295200  | 2.06621400  | -4.09070400 |
| 15 C                                                       | 1.19187200  | 1.03203300  | -2.60337500 |
| H                                                          | 1.97168300  | 0.29482500  | -2.42790800 |
| C                                                          | 2.79593200  | -1.63115400 | -1.04594100 |
| H                                                          | 2.21533000  | -2.39495300 | -1.56724300 |
| C                                                          | 4.18133400  | -1.63372900 | -1.08992400 |
| 20 H                                                       | 4.69677400  | -2.41189000 | -1.64778900 |
| C                                                          | 4.87968500  | -0.61902700 | -0.40952100 |
| C                                                          | 4.14044100  | 0.34372600  | 0.29418600  |
| H                                                          | 4.67981300  | 1.12149200  | 0.83272200  |
| C                                                          | 2.75226600  | 0.28344700  | 0.29956900  |
| 25 C                                                       | 1.89425800  | 1.21454800  | 1.04179400  |
| C                                                          | 2.37985500  | 2.27677100  | 1.79360300  |
| H                                                          | 3.44558200  | 2.49420700  | 1.84488200  |
| C                                                          | 1.49360700  | 3.09751300  | 2.50649200  |
| C                                                          | 0.11899200  | 2.80668500  | 2.44502100  |
| 30 H                                                       | -0.61873300 | 3.39848500  | 2.98155000  |
| C                                                          | -0.30208400 | 1.73785400  | 1.66999200  |
| H                                                          | -1.36094500 | 1.48587200  | 1.60035000  |
| C                                                          | -1.01304300 | -2.24472300 | -2.70106200 |
| H                                                          | -0.95255100 | -3.23175400 | -3.21532600 |
| 35 O                                                       | -0.28159000 | -2.20401200 | -1.64734600 |
| O                                                          | -1.73135800 | -1.36071400 | -3.18657100 |
| H                                                          | -0.17968900 | -5.01784900 | 3.71298800  |
| H                                                          | 0.49444400  | 3.77128800  | -4.48922100 |
| O                                                          | 6.23227200  | -0.48243100 | -0.36309000 |
| 40 O                                                       | 2.05797700  | 4.11645800  | 3.20764000  |
| C                                                          | 1.12427400  | 4.95715000  | 3.94533100  |
| H                                                          | 1.75533500  | 5.71559800  | 4.42593200  |
| H                                                          | 0.40730300  | 5.44150600  | 3.26127300  |
| H                                                          | 0.58913100  | 4.37085500  | 4.71111700  |
| 45 C                                                       | 6.98622300  | -1.49840200 | -1.08513800 |
| H                                                          | 6.74798700  | -1.47505400 | -2.16183400 |
| H                                                          | 8.03785500  | -1.22674300 | -0.92734000 |
| H                                                          | 6.79112800  | -2.50200100 | -0.67082800 |
| 50 <b>TS = [Ru(Bid)(4,4'-OMe<sub>2</sub>Bpy)(---OCOH)]</b> |             |             |             |
| Ru                                                         | 0.03898200  | -0.46158400 | 0.26642200  |
| N                                                          | 2.02995300  | -0.17968600 | 0.13768800  |
| N                                                          | 2.39534700  | 1.42475600  | 1.94641000  |
| N                                                          | 0.00193500  | 0.81492900  | 1.94867000  |
| 55 N                                                       | 2.59798600  | -1.68230400 | -1.70949500 |
| N                                                          | 0.14567100  | -1.68624200 | -1.44513100 |
| N                                                          | -2.01268900 | -0.71234000 | 0.38299200  |
| N                                                          | -0.60133600 | 1.07337500  | -0.83115300 |
| C                                                          | 2.77894300  | 0.64428500  | 0.96248900  |
| 60 C                                                       | 4.19452900  | 0.53541200  | 0.56744600  |
| C                                                          | 4.25384700  | -0.38031000 | -0.49114000 |
| C                                                          | 2.87396200  | -0.82376600 | -0.75458500 |
| C                                                          | 5.34276000  | 1.14305100  | 1.06015800  |

---

|      |             |             |             |
|------|-------------|-------------|-------------|
| H    | 5.29092800  | 1.85446100  | 1.88734400  |
| C    | 6.56675500  | 0.81298500  | 0.46116900  |
| H    | 7.48819600  | 1.27375800  | 0.82391200  |
| C    | 6.62609700  | -0.10468600 | -0.59882900 |
| 5 H  | 7.59280700  | -0.34605500 | -1.04628200 |
| C    | 5.46283500  | -0.71517100 | -1.08832900 |
| H    | 5.50339000  | -1.43247600 | -1.91104300 |
| C    | 1.33014100  | -2.09181500 | -2.05256100 |
| C    | 1.30257200  | -2.99208400 | -3.15083400 |
| 10 H | 2.26733000  | -3.27880800 | -3.56732900 |
| C    | 0.11731100  | -3.46718900 | -3.66868900 |
| H    | 0.11013900  | -4.15864000 | -4.51347400 |
| C    | -1.07752000 | -3.02734500 | -3.08121900 |
| H    | -2.05025700 | -3.35587600 | -3.44814100 |
| 15 C | -1.01550500 | -2.16293700 | -2.00405700 |
| H    | -1.93580400 | -1.82675200 | -1.53624700 |
| C    | 1.10594400  | 1.52124500  | 2.41770300  |
| C    | 0.97133800  | 2.42705500  | 3.50440600  |
| H    | 1.87537300  | 2.94988500  | 3.81391000  |
| 20 C | -0.23486700 | 2.62239200  | 4.14061800  |
| H    | -0.32315000 | 3.31876600  | 4.97660100  |
| C    | -1.33990000 | 1.88861500  | 3.68713200  |
| H    | -2.31915200 | 1.97856500  | 4.15792600  |
| C    | -1.17762000 | 1.02394900  | 2.62020200  |
| 25 H | -2.02707100 | 0.44071000  | 2.27759100  |
| C    | -2.66928100 | -1.71230500 | 1.02567200  |
| H    | -2.03153700 | -2.46545000 | 1.49389700  |
| C    | -4.05145800 | -1.79069900 | 1.10684000  |
| H    | -4.50875200 | -2.61880800 | 1.64305000  |
| 30 C | -4.82313300 | -0.78650700 | 0.49255500  |
| C    | -4.16004500 | 0.24734900  | -0.18827600 |
| H    | -4.75479900 | 1.02207900  | -0.67032200 |
| C    | -2.77319900 | 0.26183000  | -0.23063700 |
| C    | -1.97034000 | 1.27550000  | -0.91681600 |
| 35 C | -2.50035100 | 2.35341400  | -1.61151900 |
| H    | -3.57660300 | 2.50903900  | -1.66877300 |
| C    | -1.65012400 | 3.26744300  | -2.25135700 |
| C    | -0.26144200 | 3.05615800  | -2.17072800 |
| H    | 0.45056400  | 3.72554400  | -2.64743500 |
| 40 C | 0.21204500  | 1.96497100  | -1.46155400 |
| H    | 1.28137800  | 1.77189500  | -1.37838600 |
| C    | 0.90905200  | -3.03865000 | 2.32706200  |
| H    | 1.19537400  | -3.88531700 | 3.00405100  |
| O    | 0.55471200  | -3.34228300 | 1.15881900  |
| 45 O | 0.97109200  | -1.89092000 | 2.83450400  |
| O    | -2.25726500 | 4.29261400  | -2.90373700 |
| O    | -6.18022500 | -0.71922800 | 0.49470300  |
| C    | -1.35780200 | 5.23998100  | -3.54998400 |
| H    | -2.02221100 | 5.98595900  | -4.00443200 |
| 50 H | -0.69841200 | 5.72280000  | -2.80941500 |
| H    | -0.75894100 | 4.74245400  | -4.33113600 |
| C    | -6.85768700 | -1.79020000 | 1.21402200  |
| H    | -7.92575700 | -1.55947900 | 1.11133900  |
| H    | -6.63800000 | -2.77032000 | 0.75858600  |
| 55 H | -6.57196300 | -1.78892600 | 2.27932800  |

**TS = [Ru(Bid)(4,4'-OMe<sub>2</sub>Bpy)(H--H--OCOH)]**

|      |             |             |             |
|------|-------------|-------------|-------------|
| Ru   | -0.00533100 | 0.38019600  | -0.55581600 |
| N    | 1.99849800  | 0.19775500  | -0.39261100 |
| 60 N | 2.45058100  | -1.48258600 | -2.11387600 |
| N    | 0.02610500  | -1.02270600 | -2.12695800 |
| N    | 2.45559800  | 1.66872300  | 1.51006300  |
| N    | 0.04345400  | 1.79984200  | 1.00888600  |



---

|      |             |             |             |
|------|-------------|-------------|-------------|
| N    | -2.09845100 | 0.37506100  | -0.53220400 |
| N    | -0.43631500 | -1.13209000 | 0.83491200  |
| C    | 2.78143800  | -0.67066600 | -1.13348400 |
| C    | 4.16524100  | -0.59767300 | -0.63114900 |
| 5 C  | 4.16551800  | 0.31626500  | 0.43037700  |
| C    | 2.78300200  | 0.80738700  | 0.57373300  |
| C    | 5.32891000  | -1.24780600 | -1.02324400 |
| H    | 5.32289600  | -1.96106800 | -1.85054900 |
| C    | 6.50912000  | -0.95723600 | -0.32354400 |
| 10 H | 7.44158700  | -1.45029300 | -0.60745100 |
| C    | 6.50981500  | -0.04006800 | 0.73815600  |
| H    | 7.44269100  | 0.16863000  | 1.26655400  |
| C    | 5.32984900  | 0.60973700  | 1.12906700  |
| H    | 5.32477300  | 1.32499200  | 1.95458800  |
| 15 C | 1.19065000  | 2.17385100  | 1.70254600  |
| C    | 1.12988600  | 3.17380500  | 2.71030000  |
| H    | 2.06788800  | 3.42086700  | 3.20591100  |
| C    | -0.05138100 | 3.80367500  | 3.03478500  |
| H    | -0.08289500 | 4.57676600  | 3.80498700  |
| 20 C | -1.20969900 | 3.42008400  | 2.34354400  |
| H    | -2.17741400 | 3.87766300  | 2.55050600  |
| C    | -1.11554300 | 2.44233500  | 1.37027700  |
| H    | -2.00414200 | 2.15364500  | 0.81700700  |
| C    | 1.17694300  | -1.64579700 | -2.60470100 |
| 25 C | 1.10087000  | -2.55983000 | -3.69120300 |
| H    | 2.04034200  | -3.00512400 | -4.01607400 |
| C    | -0.09646100 | -2.86647200 | -4.29893000 |
| H    | -0.13980600 | -3.57020200 | -5.13247200 |
| C    | -1.25633500 | -2.24556400 | -3.81200900 |
| 30 H | -2.23640200 | -2.44190200 | -4.24753600 |
| C    | -1.14808200 | -1.35834800 | -2.75756700 |
| H    | -2.03820600 | -0.86160600 | -2.38370000 |
| C    | -2.92058800 | 1.17816200  | -1.26257200 |
| H    | -2.41684500 | 1.86840200  | -1.94060400 |
| 35 C | -4.30391100 | 1.15485200  | -1.18002300 |
| H    | -4.88666300 | 1.83392500  | -1.79821500 |
| C    | -4.91025800 | 0.24865900  | -0.29132700 |
| C    | -4.08246800 | -0.59596200 | 0.46271300  |
| H    | -4.55027500 | -1.29995400 | 1.14917000  |
| 40 C | -2.70146600 | -0.52042200 | 0.32862600  |
| C    | -1.77074100 | -1.37553300 | 1.07906400  |
| C    | -2.18173700 | -2.36087600 | 1.96813500  |
| H    | -3.23617200 | -2.55427300 | 2.15666100  |
| C    | -1.22877300 | -3.13406900 | 2.64844000  |
| 45 C | 0.13299700  | -2.88584900 | 2.40148200  |
| H    | 0.92084100  | -3.44923000 | 2.89570300  |
| C    | 0.47236600  | -1.89018600 | 1.49796500  |
| H    | 1.51968500  | -1.67387300 | 1.28163900  |
| H    | -0.04750300 | 2.33946700  | -1.56592700 |
| 50 H | 0.32564500  | 1.50808200  | -1.81539100 |
| C    | 0.44467100  | 4.30730100  | -0.96675900 |
| H    | 0.09059700  | 5.32642700  | -0.68815900 |
| O    | -0.48419200 | 3.57216200  | -1.47611000 |
| O    | 1.62419800  | 3.99492400  | -0.77585600 |
| 55 O | -1.72185800 | -4.07104700 | 3.50016000  |
| O    | -6.24737400 | 0.10866600  | -0.08840000 |
| C    | -0.72151400 | -4.84542800 | 4.22328500  |
| H    | -1.30446400 | -5.52538800 | 4.85749800  |
| H    | -0.09342100 | -5.42571900 | 3.52673800  |
| 60 H | -0.09491000 | -4.18873900 | 4.84998000  |
| C    | -7.09423200 | 0.99650500  | -0.87397400 |
| H    | -6.96065800 | 0.81371900  | -1.95353700 |
| H    | -8.11823200 | 0.73877200  | -0.57468000 |

---

---

H -6.88536400 2.05278800 -0.63464400

5

10

15

20

25

30

35

40

## 7.5 Optimized geometries for catalytic system of lw

45

### [Ru(Bid)(4,4'-(COOMe)<sub>2</sub>Bpy)(Cl)]

|      |             |             |             |
|------|-------------|-------------|-------------|
| Ru   | 0.56208600  | -0.85838400 | 0.19545600  |
| N    | 2.52233800  | -0.38141700 | 0.19008700  |
| N    | 2.70493900  | 0.85667500  | 2.28915500  |
| 50 N | 0.46056600  | -0.16140400 | 2.18791600  |
| N    | 3.23049500  | -1.36526600 | -1.93227400 |
| N    | 0.77673000  | -1.56721000 | -1.77656100 |
| N    | -1.46213800 | -1.16859800 | 0.18797900  |
| N    | -0.08626300 | 0.95506300  | -0.40201800 |
| 55 C | 3.16951600  | 0.35095200  | 1.16824700  |
| C    | 4.57890000  | 0.51766900  | 0.76719000  |
| C    | 4.73924100  | -0.15547500 | -0.45094900 |
| C    | 3.42139900  | -0.71063300 | -0.81137800 |
| C    | 5.64415500  | 1.16605600  | 1.37851000  |
| 60 H | 5.51381700  | 1.68805200  | 2.32897300  |
| C    | 6.88970200  | 1.12818200  | 0.73489600  |
| H    | 7.74774100  | 1.62964900  | 1.18787000  |
| C    | 7.05034100  | 0.45362800  | -0.48453000 |

|      |             |             |             |
|------|-------------|-------------|-------------|
| H    | 8.03150600  | 0.43744600  | -0.96394600 |
| C    | 5.96919200  | -0.19911300 | -1.09432800 |
| H    | 6.08910600  | -0.72650300 | -2.04322400 |
| C    | 2.00116400  | -1.78042900 | -2.39775800 |
| 5 C  | 2.05858600  | -2.42910400 | -3.65844300 |
| H    | 3.05006500  | -2.58342000 | -4.08215000 |
| C    | -0.32112900 | -2.54467700 | -3.72384400 |
| H    | -1.26260200 | -2.80588300 | -4.20748500 |
| C    | -0.34065700 | -1.93365400 | -2.48248500 |
| 10 H | -1.29331400 | -1.72307700 | -2.00359300 |
| C    | 1.44426100  | 0.61471300  | 2.78908300  |
| C    | 1.21356200  | 1.19510900  | 4.06405200  |
| H    | 2.01487500  | 1.81004000  | 4.47170400  |
| C    | -0.91210600 | 0.12272400  | 4.18401200  |
| 15 H | -1.83977800 | -0.12687500 | 4.69929900  |
| C    | -0.66738900 | -0.40498000 | 2.92874100  |
| H    | -1.39635300 | -1.07181700 | 2.47496600  |
| C    | -2.11456500 | -2.34586800 | 0.41964200  |
| H    | -1.46511100 | -3.20726700 | 0.58715300  |
| 20 C | -3.49491000 | -2.44510300 | 0.46002000  |
| H    | -3.96562500 | -3.40784800 | 0.65474800  |
| C    | -4.27023500 | -1.29480800 | 0.25591100  |
| C    | -3.62256200 | -0.08836700 | 0.00232900  |
| H    | -4.22143800 | 0.80583600  | -0.17074700 |
| 25 C | -2.23038800 | -0.04145500 | -0.03941500 |
| C    | -1.45666700 | 1.15157400  | -0.36732700 |
| C    | -2.02103400 | 2.39127500  | -0.66855300 |
| H    | -3.10067700 | 2.52638300  | -0.62473100 |
| C    | -1.20144000 | 3.45737700  | -1.02982900 |
| 30 C | 0.18248400  | 3.24889500  | -1.09235800 |
| H    | 0.84264000  | 4.06654300  | -1.38174800 |
| C    | 0.70091500  | 2.00623500  | -0.77802900 |
| H    | 1.77180000  | 1.80915000  | -0.81476000 |
| C    | 0.04627500  | 0.96694400  | 4.76121400  |
| 35 H | -0.11603700 | 1.41573400  | 5.74303600  |
| C    | 0.91500300  | -2.82057700 | -4.32269700 |
| H    | 0.97313500  | -3.31644500 | -5.29342200 |
| C    | -5.75357300 | -1.30137100 | 0.28357800  |
| C    | -1.73447800 | 4.80225200  | -1.35771100 |
| 40 O | -6.45195200 | -0.30332400 | 0.11006600  |
| O    | -1.03738800 | 5.75729900  | -1.69486800 |
| O    | -6.24383100 | -2.54937500 | 0.51736900  |
| O    | -3.09060700 | 4.84807900  | -1.23815900 |
| C    | -7.70654400 | -2.58959100 | 0.53197600  |
| 45 H | -8.10542300 | -2.26113000 | -0.44019700 |
| H    | -7.95326000 | -3.64127000 | 0.72163800  |
| H    | -8.10003700 | -1.94468200 | 1.33272100  |
| C    | -3.64090400 | 6.16499500  | -1.56105500 |
| H    | -3.41246800 | 6.42718100  | -2.60572300 |
| 50 H | -4.72211600 | 6.05972700  | -1.41106600 |
| H    | -3.22384000 | 6.92871200  | -0.88665700 |
| Cl   | 1.16226000  | -3.12564300 | 0.99424800  |

**[Ru(Bid)(4,4'-(COOMe)<sub>2</sub>Bpy)]<sup>+</sup>**

|       |             |             |             |
|-------|-------------|-------------|-------------|
| 55 Ru | 0.58271500  | -0.93345500 | 0.32851400  |
| N     | 2.56684700  | -0.57069500 | 0.30540300  |
| N     | 2.79955500  | 0.85861400  | 2.27315800  |
| N     | 0.51503900  | -0.07458500 | 2.25717400  |
| N     | 3.24226600  | -1.79924600 | -1.69815900 |
| 60 N  | 0.78103200  | -1.88553100 | -1.53674700 |
| N     | -1.44335200 | -1.23199000 | 0.36164900  |
| N     | -0.03619100 | 0.76464200  | -0.43057400 |
| C     | 3.24738800  | 0.22735500  | 1.21401000  |

|      |                                                                         |             |             |
|------|-------------------------------------------------------------------------|-------------|-------------|
| C    | 4.66412900                                                              | 0.27862400  | 0.81469400  |
| C    | 4.79786400                                                              | -0.51752800 | -0.32993700 |
| C    | 3.45835100                                                              | -1.03862900 | -0.65320400 |
| C    | 5.75836600                                                              | 0.92181000  | 1.37878000  |
| 5 H  | 5.64831500                                                              | 1.53804000  | 2.27360200  |
| C    | 7.00514600                                                              | 0.75217900  | 0.76086300  |
| H    | 7.88602600                                                              | 1.24570100  | 1.17683500  |
| C    | 7.13929000                                                              | -0.04496700 | -0.38600400 |
| H    | 8.12287500                                                              | -0.16154700 | -0.84592600 |
| 10 C | 6.02988900                                                              | -0.69317800 | -0.94685200 |
| H    | 6.12913300                                                              | -1.31681000 | -1.83779800 |
| C    | 1.99913100                                                              | -2.21365600 | -2.12425600 |
| C    | 2.03275900                                                              | -2.99965800 | -3.30446900 |
| H    | 3.01798300                                                              | -3.24441600 | -3.69878800 |
| 15 C | -0.34969600                                                             | -2.99886100 | -3.38999900 |
| H    | -1.29861000                                                             | -3.25585500 | -3.86100400 |
| C    | -0.35015400                                                             | -2.25838000 | -2.22315000 |
| H    | -1.29415900                                                             | -1.93991400 | -1.79003800 |
| C    | 1.52830200                                                              | 0.71964000  | 2.78500800  |
| 20 C | 1.32007600                                                              | 1.43093600  | 3.99491000  |
| H    | 2.14583900                                                              | 2.04868100  | 4.34487400  |
| C    | -0.85401200                                                             | 0.47426700  | 4.20047000  |
| H    | -1.79534800                                                             | 0.32245700  | 4.72861400  |
| C    | -0.63215000                                                             | -0.18409100 | 3.00587200  |
| 25 H | -1.39230200                                                             | -0.85490500 | 2.61391400  |
| C    | -2.09612500                                                             | -2.37540400 | 0.71210100  |
| H    | -1.45682500                                                             | -3.22370800 | 0.96232500  |
| C    | -3.47872800                                                             | -2.46254700 | 0.75724700  |
| H    | -3.95622400                                                             | -3.39900800 | 1.04210700  |
| 30 C | -4.24473400                                                             | -1.33247000 | 0.44039600  |
| C    | -3.59209300                                                             | -0.15887600 | 0.06959000  |
| H    | -4.18425100                                                             | 0.72006100  | -0.18670700 |
| C    | -2.20105300                                                             | -0.13009700 | 0.02298700  |
| C    | -1.40291500                                                             | 1.00299100  | -0.42180100 |
| 35 C | -1.92560200                                                             | 2.22028000  | -0.85461700 |
| H    | -3.00115900                                                             | 2.38932200  | -0.82704600 |
| C    | -1.07183000                                                             | 3.21433200  | -1.32423800 |
| C    | 0.30382000                                                              | 2.95778500  | -1.36064400 |
| H    | 0.98832500                                                              | 3.71817700  | -1.73673500 |
| 40 C | 0.78913600                                                              | 1.74299400  | -0.91410300 |
| H    | 1.85245500                                                              | 1.51182600  | -0.92655500 |
| C    | 0.14115700                                                              | 1.32457000  | 4.70136600  |
| H    | -0.00502600                                                             | 1.87437600  | 5.63283700  |
| C    | 0.87573000                                                              | -3.40347400 | -3.93649000 |
| 45 H | 0.91532000                                                              | -4.00225500 | -4.84812900 |
| C    | -5.73058700                                                             | -1.32321800 | 0.46750600  |
| C    | -1.55887100                                                             | 4.53452600  | -1.79706900 |
| O    | -6.41423300                                                             | -0.33689400 | 0.19996400  |
| O    | -0.82461000                                                             | 5.42340800  | -2.22244800 |
| 50 O | -6.23426400                                                             | -2.53627900 | 0.81626900  |
| O    | -2.91202800                                                             | 4.63357100  | -1.70089900 |
| C    | -7.69874300                                                             | -2.55368900 | 0.83617800  |
| H    | -8.09438200                                                             | -2.28640100 | -0.15572300 |
| H    | -7.96056300                                                             | -3.58557400 | 1.09914100  |
| 55 H | -8.07781600                                                             | -1.84689800 | 1.59047600  |
| C    | -3.41569600                                                             | 5.92622300  | -2.16892400 |
| H    | -3.17537500                                                             | 6.06497600  | -3.23427300 |
| H    | -4.50026400                                                             | 5.87442500  | -2.01562000 |
| H    | -2.97397500                                                             | 6.74362600  | -1.57875800 |
| 60   |                                                                         |             |             |
|      | <b>[Ru(Bid)(4,4'-(COOMe)<sub>2</sub>Bpy)(H<sub>2</sub>)<sup>+</sup></b> |             |             |
| Ru   | 0.53925700                                                              | -1.16324900 | 0.16199100  |
| N    | 2.53268100                                                              | -0.75554900 | 0.09330600  |

---

|      |             |             |             |
|------|-------------|-------------|-------------|
| N    | 2.97338300  | -0.19696800 | 2.43488800  |
| N    | 0.60296600  | -0.86420000 | 2.26411900  |
| N    | 2.96725800  | -0.94798900 | -2.30670500 |
| N    | 0.59166700  | -1.50655400 | -1.93329100 |
| 5 N  | -1.53709700 | -1.24516400 | 0.18011700  |
| N    | 0.04557600  | 0.82096900  | -0.11670800 |
| C    | 3.29985300  | -0.35115000 | 1.17544700  |
| C    | 4.65769400  | -0.04883200 | 0.68746100  |
| C    | 4.65575000  | -0.26621600 | -0.69502200 |
| 10 C | 3.29677200  | -0.70347200 | -1.06261900 |
| C    | 5.80052300  | 0.38024800  | 1.34997100  |
| H    | 5.79539400  | 0.55041600  | 2.42861200  |
| C    | 6.95759200  | 0.58711300  | 0.58624400  |
| H    | 7.87446800  | 0.92388200  | 1.07457700  |
| 15 C | 6.95572300  | 0.36886800  | -0.79996000 |
| H    | 7.87134500  | 0.53855900  | -1.37038500 |
| C    | 5.79668800  | -0.06192800 | -1.46017600 |
| H    | 5.78934000  | -0.23251700 | -2.53876500 |
| C    | 1.71652800  | -1.34393700 | -2.73072700 |
| 20 C | 1.64636200  | -1.59618400 | -4.12474900 |
| H    | 2.56264000  | -1.44385800 | -4.69294500 |
| C    | -0.64920900 | -2.19766700 | -3.91652600 |
| H    | -1.60020700 | -2.53812600 | -4.32591800 |
| C    | -0.54875900 | -1.93637300 | -2.56192100 |
| 25 H | -1.41586400 | -2.08457400 | -1.92512300 |
| C    | 1.72508100  | -0.44443700 | 2.96544700  |
| C    | 1.65428300  | -0.23644300 | 4.36655700  |
| H    | 2.56756700  | 0.09969500  | 4.85512000  |
| C    | -0.63404800 | -0.90012500 | 4.36573000  |
| 30 H | -1.58135000 | -1.10289300 | 4.86528500  |
| C    | -0.53327700 | -1.08678700 | 2.99874000  |
| H    | -1.39606000 | -1.44313100 | 2.44307200  |
| C    | -2.30602400 | -2.36352800 | 0.33013600  |
| H    | -1.76134100 | -3.29829000 | 0.46505900  |
| 35 C | -3.69079300 | -2.33522900 | 0.31341800  |
| H    | -4.25455300 | -3.25879600 | 0.43606500  |
| C    | -4.34332300 | -1.11030300 | 0.13764500  |
| C    | -3.57632800 | 0.04071900  | -0.01283400 |
| H    | -4.08368100 | 0.99471100  | -0.15460500 |
| 40 C | -2.18444700 | -0.04108600 | 0.01094600  |
| C    | -1.30002500 | 1.11270600  | -0.13961800 |
| C    | -1.75607900 | 2.42271200  | -0.29424700 |
| H    | -2.82281400 | 2.63779000  | -0.30356400 |
| C    | -0.83913100 | 3.45980000  | -0.43516500 |
| 45 C | 0.52474300  | 3.16005500  | -0.41753300 |
| H    | 1.26070600  | 3.95655200  | -0.52616700 |
| C    | 0.93003400  | 1.84525300  | -0.25701300 |
| H    | 1.98600700  | 1.58275100  | -0.23655000 |
| H    | 1.27517400  | -2.72723000 | 0.40153900  |
| 50 H | 0.45413500  | -2.89180500 | 0.39701000  |
| C    | 0.47930500  | -2.01842000 | -4.72552400 |
| H    | 0.44018300  | -2.21166100 | -5.79902900 |
| C    | 0.48993000  | -0.45498900 | 5.07202900  |
| H    | 0.44973100  | -0.29045000 | 6.15026700  |
| 55 C | -5.82417500 | -0.97607300 | 0.10199700  |
| C    | -1.25468200 | 4.87879800  | -0.60357000 |
| O    | -0.46620500 | 5.80967800  | -0.74344800 |
| O    | -6.41156700 | 0.09736800  | -0.01231100 |
| O    | -6.43525500 | -2.18458900 | 0.20455900  |
| 60 O | -2.60667800 | 5.00669700  | -0.58107800 |
| C    | -7.89636700 | -2.08669900 | 0.15881000  |
| H    | -8.24538900 | -3.12485300 | 0.21027700  |
| H    | -8.26393500 | -1.50528300 | 1.01825100  |

---

---

|     |             |             |             |
|-----|-------------|-------------|-------------|
| H   | -8.21542000 | -1.60812600 | -0.77966900 |
| C   | -3.04813400 | 6.39442800  | -0.74019800 |
| H   | -4.14248300 | 6.34420200  | -0.69284800 |
| H   | -2.64556300 | 7.01622500  | 0.07400100  |
| 5 H | -2.71507100 | 6.78979600  | -1.71205900 |

**[Ru(Bid)(4,4'-(COOMe)<sub>2</sub>Bpy)(H)]**

|      |             |             |             |
|------|-------------|-------------|-------------|
| Ru   | 0.62149900  | -1.02228200 | 0.41718000  |
| H    | 0.95332000  | -2.39159500 | 1.26197900  |
| 10 N | 2.58554700  | -0.55562600 | 0.40102400  |
| N    | 2.66837100  | 1.13988700  | 2.16273200  |
| N    | 0.44446300  | 0.07515500  | 2.21042300  |
| N    | 3.37721600  | -1.95215600 | -1.44251900 |
| N    | 0.92223800  | -2.15267500 | -1.32675400 |
| 15 N | -1.40140000 | -1.25638900 | 0.35774900  |
| N    | -0.01438200 | 0.78026800  | -0.58072800 |
| C    | 3.18044900  | 0.41057700  | 1.19356700  |
| C    | 4.59096300  | 0.54174900  | 0.78751700  |
| C    | 4.80556100  | -0.37761500 | -0.24867700 |
| 20 C | 3.51957800  | -1.05493300 | -0.49300100 |
| C    | 5.61644400  | 1.35520400  | 1.25305500  |
| H    | 5.44397300  | 2.06924600  | 2.06139000  |
| C    | 6.87722900  | 1.22896300  | 0.65167400  |
| H    | 7.70448700  | 1.85491200  | 0.99353600  |
| 25 C | 7.09208000  | 0.30887800  | -0.38519900 |
| H    | 8.08404300  | 0.22929500  | -0.83529000 |
| C    | 6.05092800  | -0.50821500 | -0.85001100 |
| H    | 6.21244700  | -1.22577100 | -1.65752100 |
| C    | 2.17446600  | -2.49465500 | -1.83356000 |
| 30 C | 2.28574400  | -3.43131200 | -2.89523400 |
| H    | 3.29524700  | -3.67497300 | -3.22422500 |
| C    | -0.08874100 | -3.57393600 | -3.03753400 |
| H    | -1.00853100 | -3.94688000 | -3.48881300 |
| C    | -0.16290100 | -2.68371200 | -1.98255500 |
| 35 H | -1.13485300 | -2.36871300 | -1.61154500 |
| C    | 1.39945300  | 0.97925100  | 2.66892500  |
| C    | 1.11751200  | 1.81041800  | 3.78604200  |
| H    | 1.89959400  | 2.50838700  | 4.08218100  |
| C    | -1.00574800 | 0.75939500  | 4.05190800  |
| 40 H | -1.95157800 | 0.61321900  | 4.57406000  |
| C    | -0.71087900 | -0.01924600 | 2.94831400  |
| H    | -1.41528900 | -0.78137500 | 2.62231800  |
| C    | -2.09531700 | -2.37148100 | 0.75601100  |
| H    | -1.47706200 | -3.21447600 | 1.06390900  |
| 45 C | -3.47547000 | -2.44032200 | 0.78706200  |
| H    | -3.96588800 | -3.35349400 | 1.12177400  |
| C    | -4.22694600 | -1.32247400 | 0.39287800  |
| C    | -3.54520600 | -0.18840900 | -0.04080000 |
| H    | -4.12330200 | 0.67793200  | -0.36218700 |
| 50 C | -2.15183600 | -0.16721900 | -0.06612000 |
| C    | -1.37594900 | 0.97165000  | -0.56391600 |
| C    | -1.95171700 | 2.16244800  | -1.01785300 |
| H    | -3.03052600 | 2.30683900  | -0.98991400 |
| C    | -1.13277800 | 3.17639800  | -1.50859300 |
| 55 C | 0.25243000  | 2.97428200  | -1.54113500 |
| H    | 0.90679600  | 3.75668800  | -1.92607400 |
| C    | 0.76734400  | 1.77668200  | -1.07233800 |
| H    | 1.84059500  | 1.57676200  | -1.07793700 |
| C    | -0.07295200 | 1.71849600  | 4.47414400  |
| 60 H | -0.27487100 | 2.36010200  | 5.33402300  |
| C    | 1.17319700  | -3.98113600 | -3.49519400 |
| H    | 1.27250800  | -4.69717600 | -4.31316900 |
| C    | -5.70687400 | -1.29106100 | 0.40732600  |

---

|      |             |             |             |
|------|-------------|-------------|-------------|
| C    | -1.67094400 | 4.46903600  | -2.00408700 |
| O    | -6.38381000 | -0.32637700 | 0.05066200  |
| O    | -0.97516600 | 5.37552500  | -2.45714600 |
| O    | -6.22923800 | -2.46328700 | 0.86682600  |
| 5 O  | -3.02701500 | 4.52591900  | -1.89499700 |
| C    | -7.69166100 | -2.46022900 | 0.89355800  |
| H    | -8.09334000 | -2.31473700 | -0.12124700 |
| H    | -7.96481800 | -3.44874800 | 1.28234600  |
| H    | -8.06058200 | -1.66300400 | 1.55728200  |
| 10 C | -3.57767200 | 5.79048300  | -2.38432800 |
| H    | -3.35803100 | 5.91230500  | -3.45628300 |
| H    | -4.65790000 | 5.70911500  | -2.21359000 |
| H    | -3.15365300 | 6.63537200  | -1.82024000 |

15 **TS = [Ru(Bid)(4,4'-(COOMe)<sub>2</sub>Bpy)(H-H-NMe<sub>2</sub>)]**

|      |             |             |             |
|------|-------------|-------------|-------------|
| N    | 2.33949600  | 0.07985500  | 0.11030300  |
| N    | 3.00977100  | -0.09554900 | 2.45329700  |
| N    | 0.61753800  | -0.67520700 | 2.29685600  |
| N    | 2.47776500  | 0.70160500  | -2.25078600 |
| 20 N | 0.43110000  | -0.63333400 | -1.91665100 |
| N    | -1.53317000 | -1.14713700 | 0.22036800  |
| N    | -0.43632800 | 1.22838300  | 0.17702700  |
| C    | 3.19180700  | 0.22338800  | 1.19399300  |
| C    | 4.43324600  | 0.86431500  | 0.72198400  |
| 25 C | 4.26287100  | 1.12842400  | -0.64377400 |
| C    | 2.93123600  | 0.61778400  | -1.01873200 |
| C    | 5.60386300  | 1.21238600  | 1.38367800  |
| H    | 5.73233300  | 1.00374000  | 2.44792600  |
| C    | 6.61465900  | 1.83697700  | 0.63888900  |
| 30 H | 7.54847200  | 2.12207000  | 1.12818300  |
| C    | 6.44371600  | 2.10235700  | -0.72790600 |
| H    | 7.24621600  | 2.59207200  | -1.28360800 |
| C    | 5.25867700  | 1.74731600  | -1.38837700 |
| H    | 5.12112700  | 1.95117000  | -2.45241500 |
| 35 C | 1.32669100  | 0.08640600  | -2.69691100 |
| C    | 1.13774800  | 0.16962500  | -4.10068300 |
| H    | 1.85731600  | 0.76913900  | -4.65638900 |
| C    | -0.73661600 | -1.29918600 | -3.94977800 |
| H    | -1.54095700 | -1.88559400 | -4.39389800 |
| 40 C | -0.54686900 | -1.32905700 | -2.57989000 |
| H    | -1.19377100 | -1.94426200 | -1.95800700 |
| C    | 1.81442600  | -0.53031100 | 2.98777300  |
| C    | 1.86459800  | -0.77225500 | 4.38463200  |
| H    | 2.83619700  | -0.66380300 | 4.86479600  |
| 45 C | -0.48824500 | -1.17028900 | 4.41433700  |
| H    | -1.42122600 | -1.39322600 | 4.92854600  |
| C    | -0.49550100 | -0.95764100 | 3.04733100  |
| H    | -1.43206700 | -1.01804800 | 2.49867800  |
| C    | -2.04999800 | -2.40957200 | 0.31369000  |
| 50 H | -1.31671300 | -3.20799000 | 0.43703200  |
| C    | -3.40644200 | -2.67684800 | 0.24732600  |
| H    | -3.76454700 | -3.70246100 | 0.32721600  |
| C    | -4.30344600 | -1.61528100 | 0.06873700  |
| C    | -3.79776500 | -0.32086000 | -0.01596400 |
| 55 H | -4.49439000 | 0.50719500  | -0.14665100 |
| C    | -2.42484100 | -0.10061600 | 0.07437400  |
| C    | -1.81000800 | 1.22623700  | 0.06685100  |
| C    | -2.53455200 | 2.41740400  | -0.00389400 |
| H    | -3.61968100 | 2.39867000  | -0.09039200 |
| 60 C | -1.86278000 | 3.63604900  | 0.04291600  |
| C    | -0.46995200 | 3.63556400  | 0.16811000  |
| H    | 0.07325800  | 4.57957300  | 0.21055500  |
| C    | 0.20439600  | 2.42738600  | 0.23521900  |

|      |             |             |             |
|------|-------------|-------------|-------------|
| H    | 1.28841300  | 2.38667300  | 0.34292300  |
| H    | 1.57589700  | -2.31951900 | -0.21799600 |
| H    | 0.87523700  | -2.30434600 | 0.33588500  |
| N    | 2.68067600  | -3.14074000 | -0.89691300 |
| 5 Ru | 0.44986200  | -0.64128600 | 0.19437100  |
| C    | 2.09610200  | -4.48711900 | -0.78577300 |
| H    | 1.84666100  | -4.68826700 | 0.26964100  |
| H    | 1.16950300  | -4.53030800 | -1.38347600 |
| H    | 2.79313300  | -5.26887900 | -1.14445500 |
| 10 C | 3.87425000  | -3.02175100 | -0.04448500 |
| H    | 4.32445200  | -2.02612400 | -0.18176700 |
| H    | 3.58044400  | -3.14156800 | 1.01240500  |
| H    | 4.63121200  | -3.79191600 | -0.29330300 |
| C    | 2.99912100  | -2.82756800 | -2.29895400 |
| 15 H | 2.08182400  | -2.88459100 | -2.90711500 |
| H    | 3.41498200  | -1.81026900 | -2.36453900 |
| H    | 3.74142300  | -3.54073500 | -2.71147100 |
| C    | 0.11501700  | -0.50686700 | -4.73213000 |
| H    | -0.01347000 | -0.44274400 | -5.81419500 |
| 20 C | 0.73241800  | -1.09870000 | 5.10191200  |
| H    | 0.78328200  | -1.27793400 | 6.17739600  |
| C    | -5.77241900 | -1.80334800 | -0.02630800 |
| C    | -2.57213900 | 4.94142500  | -0.02208200 |
| O    | -6.57542000 | -0.88698900 | -0.19362800 |
| 25 O | -2.00974700 | 6.03279700  | 0.02268500  |
| O    | -6.11627800 | -3.11349200 | 0.09880100  |
| O    | -3.91668900 | 4.76990500  | -0.12993900 |
| C    | -7.56131600 | -3.32888300 | 0.01058900  |
| H    | -7.69045700 | -4.40900300 | 0.14932100  |
| 30 H | -8.07926600 | -2.76624000 | 0.80252300  |
| H    | -7.93421600 | -3.01235200 | -0.97571400 |
| C    | -4.65072600 | 6.03540600  | -0.17892100 |
| H    | -4.35048600 | 6.61548500  | -1.06507900 |
| H    | -5.70554600 | 5.74257000  | -0.24254500 |
| 35 H | -4.46072300 | 6.62172200  | 0.73313200  |

**TS = [Ru(Bid)(4,4'-(COOMe)<sub>2</sub>Bpy)(H-CO<sub>2</sub>)]**

|      |             |             |             |
|------|-------------|-------------|-------------|
| Ru   | 0.61324800  | -0.72398400 | -0.00801000 |
| H    | 1.18875000  | -2.25211200 | 0.40748200  |
| 40 N | 2.54068400  | -0.12915700 | -0.03025100 |
| N    | 2.69150600  | 1.06945300  | 2.09365400  |
| N    | 0.49526400  | -0.04326900 | 1.99183500  |
| N    | 3.30068100  | -1.16542500 | -2.11012100 |
| N    | 0.84365100  | -1.34940400 | -1.99741400 |
| 45 N | -1.36339700 | -1.21259700 | 0.00746000  |
| N    | -0.29077700 | 1.11611300  | -0.51380800 |
| C    | 3.17527000  | 0.58061100  | 0.97219200  |
| C    | 4.59985000  | 0.71394800  | 0.61799800  |
| C    | 4.78615900  | 0.02538000  | -0.58827400 |
| 50 C | 3.46857800  | -0.49792500 | -0.99094200 |
| C    | 5.65988200  | 1.33950400  | 1.26169500  |
| H    | 5.50994300  | 1.87362000  | 2.20248100  |
| C    | 6.92639400  | 1.26260400  | 0.66400100  |
| H    | 7.78074100  | 1.74507900  | 1.14390500  |
| 55 C | 7.11284700  | 0.57253000  | -0.54307100 |
| H    | 8.11023200  | 0.52471400  | -0.98554800 |
| C    | 6.03695500  | -0.05616700 | -1.18653600 |
| H    | 6.17651500  | -0.59540600 | -2.12605300 |
| C    | 2.07522500  | -1.53912200 | -2.61716800 |
| 60 C | 2.14181600  | -2.11822100 | -3.91072500 |
| H    | 3.13746100  | -2.26497600 | -4.32753400 |
| C    | -0.23844300 | -2.18087100 | -4.02144000 |
| H    | -1.17587300 | -2.39056500 | -4.53704400 |



|      |             |             |             |
|------|-------------|-------------|-------------|
| C    | -0.26931600 | -1.64747600 | -2.74554900 |
| H    | -1.22541000 | -1.44495400 | -2.26943900 |
| C    | 1.43173800  | 0.80256600  | 2.57825700  |
| C    | 1.15158600  | 1.42061200  | 3.82637500  |
| 5 H  | 1.91639800  | 2.08786800  | 4.22195700  |
| C    | -0.92257000 | 0.25194400  | 3.95615800  |
| H    | -1.84533100 | -0.02231200 | 4.46775400  |
| C    | -0.63150700 | -0.31395000 | 2.72874800  |
| H    | -1.31837100 | -1.03557200 | 2.29291000  |
| 10 C | -1.87326700 | -2.47075100 | 0.18384700  |
| H    | -1.13184400 | -3.26587600 | 0.26733200  |
| C    | -3.22914100 | -2.73143300 | 0.27243900  |
| H    | -3.57802900 | -3.75251200 | 0.42132600  |
| C    | -4.13918400 | -1.66786300 | 0.18114600  |
| 15 C | -3.64244600 | -0.38323700 | -0.02881400 |
| H    | -4.34691500 | 0.44427700  | -0.11638500 |
| C    | -2.26947900 | -0.17079900 | -0.12794100 |
| C    | -1.66286200 | 1.13211500  | -0.40549400 |
| C    | -2.39168400 | 2.31215400  | -0.57490700 |
| 20 H | -3.47665500 | 2.31067400  | -0.48394600 |
| C    | -1.72028300 | 3.49868000  | -0.85905100 |
| C    | -0.32557800 | 3.47803700  | -0.97841500 |
| H    | 0.21454200  | 4.39790000  | -1.20325100 |
| C    | 0.34819700  | 2.28034200  | -0.80202100 |
| 25 H | 1.43421300  | 2.21503200  | -0.88471400 |
| C    | 1.68666700  | -2.74233700 | 1.93384500  |
| O    | 2.83708400  | -2.43225700 | 1.97408500  |
| O    | 0.70516100  | -3.26055800 | 2.37302400  |
| C    | 1.00291000  | -2.44696600 | -4.61561300 |
| 30 H | 1.06811800  | -2.88435100 | -5.61355400 |
| C    | -0.01580500 | 1.16596100  | 4.51299200  |
| H    | -0.21746700 | 1.64601700  | 5.47251500  |
| C    | -2.42794300 | 4.79277400  | -1.04046400 |
| C    | -5.60565100 | -1.84373800 | 0.29377500  |
| 35 O | -6.41990100 | -0.92206800 | 0.24357500  |
| O    | -1.86352000 | 5.85783400  | -1.28065400 |
| O    | -5.94143200 | -3.15349800 | 0.46026200  |
| O    | -3.77495400 | 4.65095900  | -0.90850800 |
| C    | -4.49542500 | 5.91126000  | -1.09609700 |
| 40 H | -4.32175900 | 6.30038900  | -2.11133400 |
| H    | -5.55131800 | 5.65309600  | -0.95123900 |
| H    | -4.16667700 | 6.65285100  | -0.35203400 |
| C    | -7.38520200 | -3.35557600 | 0.58172000  |
| H    | -7.90083700 | -2.98041600 | -0.31575200 |
| 45 H | -7.50764400 | -4.44107300 | 0.67858200  |
| H    | -7.76819900 | -2.83693800 | 1.47427100  |

**[Ru(Bid)(4,4'-(COOMe)<sub>2</sub>Bpy)(H-CD<sub>2</sub>)**

|      |             |             |             |
|------|-------------|-------------|-------------|
| Ru   | 0.41885900  | -0.79737900 | 0.09297600  |
| 50 N | 2.39803600  | -0.37250300 | 0.10427800  |
| N    | 2.72771900  | 0.24886400  | 2.44605800  |
| N    | 0.40437100  | -0.54506900 | 2.19407000  |
| N    | 2.99462000  | -0.82323400 | -2.22360900 |
| N    | 0.55803400  | -1.13437300 | -1.99201500 |
| 55 N | -1.60850100 | -1.07188700 | 0.07158700  |
| N    | -0.21642700 | 1.10368200  | -0.16359500 |
| C    | 3.11567200  | 0.05868900  | 1.20698800  |
| C    | 4.50995400  | 0.29505500  | 0.79071900  |
| C    | 4.59172700  | -0.03293500 | -0.56748400 |
| 60 C | 3.24429200  | -0.45525700 | -0.99013500 |
| C    | 5.62304400  | 0.73462700  | 1.49534500  |
| H    | 5.55486100  | 0.98511300  | 2.55613600  |
| C    | 6.83513800  | 0.84491700  | 0.79879500  |

|                                                    |             |             |             |
|----------------------------------------------------|-------------|-------------|-------------|
| H                                                  | 7.72957800  | 1.18994300  | 1.32195900  |
| C                                                  | 6.91703000  | 0.51597800  | -0.56255000 |
| H                                                  | 7.87416800  | 0.60875800  | -1.08030100 |
| C                                                  | 5.78861400  | 0.06890400  | -1.26460900 |
| 5 H                                                | 5.84671900  | -0.19217600 | -2.32342500 |
| C                                                  | 1.74990900  | -1.16228300 | -2.70645600 |
| C                                                  | 1.75677500  | -1.53813700 | -4.07450100 |
| H                                                  | 2.72679700  | -1.55365400 | -4.56919300 |
| C                                                  | 0.59423800  | -1.85686900 | -4.74289400 |
| 10 H                                               | 0.61333600  | -2.14555600 | -5.79534300 |
| C                                                  | -0.61135400 | -1.78653500 | -4.03322400 |
| H                                                  | -1.56786300 | -2.01098700 | -4.50552700 |
| C                                                  | -0.58158900 | -1.43129800 | -2.69710500 |
| H                                                  | -1.51212900 | -1.38539400 | -2.13970800 |
| 15 C                                               | 1.47396200  | -0.04926300 | 2.93030900  |
| C                                                  | 1.33894500  | 0.17057900  | 4.32631300  |
| H                                                  | 2.21698000  | 0.56928300  | 4.84130500  |
| C                                                  | 0.16934300  | -0.11919300 | 4.99490400  |
| H                                                  | 0.08046900  | 0.05293100  | 6.06912600  |
| 20 C                                               | -0.89573900 | -0.65219900 | 4.25676800  |
| H                                                  | -1.84131400 | -0.92128000 | 4.72757600  |
| C                                                  | -0.73686800 | -0.84272500 | 2.89664500  |
| H                                                  | -1.55242400 | -1.26821400 | 2.31891300  |
| C                                                  | -2.26069900 | -2.26851900 | 0.15211300  |
| 25 H                                               | -1.61871500 | -3.14994200 | 0.20130800  |
| C                                                  | -3.64183700 | -2.36863600 | 0.17278800  |
| H                                                  | -4.11578900 | -3.34643300 | 0.24429400  |
| C                                                  | -4.41206100 | -1.19984000 | 0.10557000  |
| C                                                  | -3.76218800 | 0.02802800  | 0.00404100  |
| 30 H                                               | -4.35888400 | 0.93833000  | -0.05739500 |
| C                                                  | -2.37025900 | 0.07543400  | -0.01742000 |
| C                                                  | -1.58489300 | 1.29797000  | -0.15581900 |
| C                                                  | -2.13017300 | 2.57263600  | -0.29687100 |
| H                                                  | -3.21004300 | 2.72320700  | -0.29469400 |
| 35 C                                               | -1.29333200 | 3.67443000  | -0.45066700 |
| C                                                  | 0.09190100  | 3.47393500  | -0.45863400 |
| H                                                  | 0.77751000  | 4.31163200  | -0.57560400 |
| C                                                  | 0.59207200  | 2.19012100  | -0.31422200 |
| H                                                  | 1.66326300  | 1.99209600  | -0.31792300 |
| 40 C                                               | 1.56136500  | -3.31170400 | 0.24313200  |
| H                                                  | 0.67143600  | -2.57190000 | 0.51411700  |
| O                                                  | 1.33715000  | -3.97202300 | -0.78110000 |
| O                                                  | 2.45519200  | -3.32748000 | 1.10005300  |
| C                                                  | -5.89674900 | -1.20646800 | 0.13526500  |
| 45 C                                               | -1.91701900 | 5.01465400  | -0.60709100 |
| O                                                  | -6.59056500 | -0.19366800 | 0.06514000  |
| O                                                  | -3.12959200 | 5.21557700  | -0.59023400 |
| O                                                  | -6.38640500 | -2.46968700 | 0.25304500  |
| O                                                  | -0.97673200 | 5.98154900  | -0.77620000 |
| 50 C                                               | -7.84888600 | -2.50953500 | 0.30333400  |
| H                                                  | -8.27394000 | -2.10697900 | -0.62883600 |
| H                                                  | -8.09361100 | -3.57255300 | 0.41663500  |
| H                                                  | -8.21628000 | -1.92843600 | 1.16305800  |
| C                                                  | -1.55505500 | 7.31558100  | -0.94602800 |
| 55 H                                               | -2.12349500 | 7.60229700  | -0.04802500 |
| H                                                  | -0.69066000 | 7.97511200  | -1.08834300 |
| H                                                  | -2.21348500 | 7.33612100  | -1.82802500 |
| 60 [Ru(Bid)(4,4'-(COOMe) <sub>2</sub> Bpy)(O-COH)] |             |             |             |
| Ru                                                 | 0.52780900  | -0.84152900 | 0.06118300  |
| N                                                  | 2.44509900  | -0.23074200 | 0.07667500  |
| N                                                  | 2.50581700  | 1.00826100  | 2.17964800  |

---

|      |             |             |             |
|------|-------------|-------------|-------------|
| N    | 0.38472900  | -0.24496500 | 2.07101400  |
| N    | 3.25289400  | -1.21035100 | -2.00957700 |
| N    | 0.79859000  | -1.44634400 | -1.93524800 |
| N    | -1.45228900 | -1.32508300 | 0.04742000  |
| 5 N  | -0.28353300 | 0.94245900  | -0.42325600 |
| C    | 3.02671200  | 0.54029500  | 1.06716100  |
| C    | 4.43532300  | 0.77443800  | 0.70090000  |
| C    | 4.66523500  | 0.08717600  | -0.49940500 |
| C    | 3.38619100  | -0.53299800 | -0.89159800 |
| 10 C | 5.45105800  | 1.48130900  | 1.33161300  |
| H    | 5.26850700  | 2.01334600  | 2.26776700  |
| C    | 6.71665900  | 1.48921700  | 0.72714500  |
| H    | 7.53638400  | 2.03707200  | 1.19693700  |
| C    | 6.94649200  | 0.80082100  | -0.47317300 |
| 15 H | 7.94250400  | 0.82026500  | -0.92079900 |
| C    | 5.91576100  | 0.08847100  | -1.10336000 |
| H    | 6.08934200  | -0.45076800 | -2.03709000 |
| C    | 2.04520400  | -1.64063100 | -2.51870100 |
| C    | 2.14533900  | -2.26823400 | -3.78698600 |
| 20 H | 3.15000300  | -2.41634100 | -4.18105700 |
| C    | -0.23357400 | -2.36466600 | -3.94333600 |
| H    | -1.15684200 | -2.60455900 | -4.47099700 |
| C    | -0.29617900 | -1.78244400 | -2.68979500 |
| H    | -1.26326600 | -1.56689500 | -2.24105700 |
| 25 C | 1.27468000  | 0.63532800  | 2.67502200  |
| C    | 0.98219700  | 1.17004800  | 3.95612400  |
| H    | 1.70239500  | 1.87648800  | 4.36672000  |
| C    | -0.98015900 | -0.18074900 | 4.08805400  |
| H    | -1.85587800 | -0.56164700 | 4.61365100  |
| 30 C | -0.68726900 | -0.65278200 | 2.82066200  |
| H    | -1.32616600 | -1.40517200 | 2.36279500  |
| C    | -1.98667800 | -2.57456200 | 0.18484000  |
| H    | -1.25953900 | -3.38538600 | 0.25613500  |
| C    | -3.35009600 | -2.79688400 | 0.25383900  |
| 35 H | -3.74423500 | -3.80669300 | 0.37079200  |
| C    | -4.23063500 | -1.70732700 | 0.18605800  |
| C    | -3.70373200 | -0.42810200 | 0.01980700  |
| H    | -4.37020700 | 0.43004200  | -0.05387200 |
| C    | -2.32233100 | -0.25645200 | -0.06212200 |
| 40 C | -1.66303800 | 1.01988900  | -0.32227600 |
| C    | -2.33430500 | 2.22621900  | -0.51070700 |
| H    | -3.41898500 | 2.28450400  | -0.41719700 |
| C    | -1.62099800 | 3.37914100  | -0.82839200 |
| C    | -0.22888000 | 3.29366300  | -0.96486200 |
| 45 H | 0.36187600  | 4.17149900  | -1.22311600 |
| C    | 0.39752900  | 2.07681000  | -0.75683000 |
| H    | 1.47815100  | 1.96852600  | -0.84793900 |
| C    | 1.91378200  | -3.16496800 | 1.48039800  |
| H    | 2.07183000  | -4.26715100 | 1.51298100  |
| 50 O | 1.12760500  | -2.82090300 | 0.52303900  |
| O    | 2.47393700  | -2.44938500 | 2.31874700  |
| C    | 1.02349900  | -2.64042800 | -4.49840800 |
| H    | 1.11446000  | -3.11779200 | -5.47587400 |
| C    | -0.13749500 | 0.78106300  | 4.66201500  |
| 55 H | -0.34651000 | 1.19325000  | 5.65096700  |
| O    | -6.19081400 | -3.08007400 | 0.37818600  |
| O    | -3.59682100 | 4.74108100  | -0.88560100 |
| O    | -6.40138300 | -0.80104800 | 0.25059800  |
| O    | -1.55246400 | 5.67517800  | -1.33578300 |
| 60 C | -2.37711200 | 4.64268400  | -1.01134600 |
| C    | -5.68843200 | -1.96184600 | 0.28180700  |
| C    | -2.27032600 | 6.93452700  | -1.53484500 |
| H    | -1.49205700 | 7.65874300  | -1.80378600 |

---

|     |             |             |             |
|-----|-------------|-------------|-------------|
| H   | -3.00716600 | 6.83015600  | -2.34627400 |
| H   | -2.77966000 | 7.23442900  | -0.60587600 |
| C   | -7.84530800 | -1.02023200 | 0.33373400  |
| H   | -8.28056200 | -0.01396900 | 0.31049500  |
| 5 H | -8.19044400 | -1.61532100 | -0.52586800 |
| H   | -8.10183900 | -1.53755400 | 1.27107700  |

**TS = [Ru(Bid)(4,4'-(COOMe)<sub>2</sub>Bpy)(--D-COH)]**

|      |             |             |             |
|------|-------------|-------------|-------------|
| Ru   | 0.46670900  | -0.70721400 | 0.07217400  |
| 10 N | 2.44033500  | -0.27010700 | 0.06798700  |
| N    | 2.67578800  | 0.83072400  | 2.23684800  |
| N    | 0.38435400  | -0.07057500 | 2.09451900  |
| N    | 3.11698800  | -1.20741200 | -2.08557600 |
| N    | 0.65350800  | -1.28033300 | -1.94525000 |
| 15 N | -1.52171100 | -1.13392700 | 0.08988700  |
| N    | -0.27748800 | 1.06058200  | -0.37220000 |
| C    | 3.12343400  | 0.35462800  | 1.09896100  |
| C    | 4.54923000  | 0.42588200  | 0.73187900  |
| C    | 4.68276000  | -0.19626600 | -0.51599900 |
| 20 C | 3.33473600  | -0.62378200 | -0.93158600 |
| C    | 5.64860500  | 0.95394900  | 1.39629700  |
| H    | 5.53840300  | 1.43672100  | 2.36968700  |
| C    | 6.90118500  | 0.84573400  | 0.77586800  |
| H    | 7.78626800  | 1.25169700  | 1.27037500  |
| 25 C | 7.03542900  | 0.22077000  | -0.47302100 |
| H    | 8.02337800  | 0.14707600  | -0.93260000 |
| C    | 5.92005300  | -0.30950900 | -1.13689100 |
| H    | 6.01905600  | -0.79794300 | -2.10866100 |
| C    | 1.86703300  | -1.50517000 | -2.58532900 |
| 30 C | 1.89110100  | -2.04362800 | -3.89685300 |
| H    | 2.87364400  | -2.21894500 | -4.33293600 |
| C    | 0.72955500  | -2.30388800 | -4.59329900 |
| H    | 0.76288800  | -2.71346100 | -5.60446400 |
| C    | -0.49087800 | -2.00592000 | -3.97370300 |
| 35 H | -1.44354200 | -2.16332100 | -4.47968700 |
| C    | -0.48114100 | -1.50894500 | -2.68282400 |
| H    | -1.42248100 | -1.28132700 | -2.18966900 |
| C    | 1.39434600  | 0.65590600  | 2.71254500  |
| C    | 1.17321000  | 1.24014300  | 3.98680500  |
| 40 H | 1.99649200  | 1.81422000  | 4.40969000  |
| C    | -0.01401100 | 1.06443700  | 4.66574500  |
| H    | -0.16948900 | 1.51646700  | 5.64711600  |
| C    | -1.00119900 | 0.26664900  | 4.07218300  |
| H    | -1.94485500 | 0.05472100  | 4.57505600  |
| 45 C | -0.76378700 | -0.26708900 | 2.81807700  |
| H    | -1.51327500 | -0.90385300 | 2.35503200  |
| C    | -2.07626200 | -2.36755700 | 0.25772500  |
| H    | -1.36535700 | -3.19009600 | 0.35906900  |
| C    | -3.44697900 | -2.56366800 | 0.31408000  |
| 50 H | -3.84884800 | -3.56600900 | 0.45571000  |
| C    | -4.30237500 | -1.45861200 | 0.19786400  |
| C    | -3.74898500 | -0.19352300 | 0.00856500  |
| H    | -4.40917100 | 0.66819100  | -0.09298800 |
| C    | -2.36594900 | -0.05102700 | -0.05187200 |
| 55 C | -1.65740500 | 1.19624600  | -0.30063800 |
| C    | -2.26754900 | 2.43229600  | -0.49121100 |
| H    | -3.35111900 | 2.53213200  | -0.42034100 |
| C    | -1.49672800 | 3.55616400  | -0.77538300 |
| C    | -0.10671700 | 3.41125000  | -0.87511300 |
| 60 H | 0.52882400  | 4.26565600  | -1.10315300 |
| C    | 0.46637700  | 2.16783600  | -0.66984800 |
| H    | 1.54270700  | 2.01482400  | -0.73233400 |
| C    | 1.90610400  | -3.70065400 | 1.20868100  |

|      |             |             |              |
|------|-------------|-------------|--------------|
| H    | 2.44503900  | -4.66893400 | 1.37889400   |
| O    | 1.37778600  | -3.56955600 | 0.06996800   |
| O    | 1.89733400  | -2.88750800 | 2.16216600   |
| C    | -5.78119900 | -1.57059900 | 0.26641200   |
| 5 C  | -2.19362100 | 4.85438800  | -0.95540100  |
| O    | -3.40999800 | 5.00116700  | -0.849666800 |
| O    | -6.54883200 | -0.61363100 | 0.18120600   |
| O    | -6.17815600 | -2.86036300 | 0.43662300   |
| O    | -1.32059800 | 5.85445300  | -1.24979400  |
| 10 C | -1.98248800 | 7.14784700  | -1.43028300  |
| H    | -1.17250700 | 7.84143700  | -1.68568000  |
| H    | -2.72227100 | 7.08756700  | -2.24334500  |
| H    | -2.48088600 | 7.45315700  | -0.49716900  |
| C    | -7.63310800 | -2.99588700 | 0.52393000   |
| 15 H | -7.80458500 | -4.07123400 | 0.65357400   |
| H    | -8.01614500 | -2.43042900 | 1.38736300   |
| H    | -8.10673300 | -2.62969600 | -0.39989600  |

**TS = [Ru(Bid)(4,4'-(COOMe)<sub>2</sub>Bpy)(H--H--O-COH)]**

|       |             |             |             |
|-------|-------------|-------------|-------------|
| 20 Ru | -0.08913100 | -0.35257000 | -0.27492800 |
| N     | -0.21585800 | 1.64771500  | -0.07574100 |
| N     | 2.14718500  | 2.23003600  | 0.16823600  |
| N     | 1.99942500  | -0.15487600 | -0.46139400 |
| N     | -2.63458000 | 1.98619500  | -0.20645800 |
| 25 N  | -2.19439100 | -0.44168700 | -0.14851800 |
| N     | 0.08715500  | -2.39829500 | -0.31261700 |
| N     | 0.19486200  | -0.75044200 | 1.68850500  |
| C     | 0.86112200  | 2.49332200  | 0.12902000  |
| C     | 0.34543500  | 3.86437300  | 0.30254500  |
| 30 C  | -1.04710200 | 3.79872300  | 0.16009200  |
| C     | -1.38940500 | 2.38113700  | -0.06815200 |
| C     | 0.98927000  | 5.07148500  | 0.54118000  |
| H     | 2.07526700  | 5.11671800  | 0.64836000  |
| C     | 0.20042200  | 6.22711700  | 0.63970500  |
| 35 H  | 0.67623700  | 7.19190400  | 0.82919200  |
| C     | -1.19319200 | 6.16193300  | 0.49529600  |
| H     | -1.78425000 | 7.07719600  | 0.57292800  |
| C     | -1.83527700 | 4.93849600  | 0.25206400  |
| H     | -2.92004000 | 4.88250800  | 0.13683700  |
| 40 C  | -3.03326600 | 0.66535500  | -0.26967200 |
| C     | -4.42561600 | 0.49695800  | -0.40475200 |
| H     | -5.04258900 | 1.38673500  | -0.50942900 |
| C     | -5.01644600 | -0.76236500 | -0.37688600 |
| C     | -4.17603100 | -1.87509800 | -0.17747800 |
| 45 H  | -4.56071800 | -2.88975300 | -0.10795800 |
| C     | -2.81408500 | -1.65900100 | -0.07578900 |
| H     | -2.15753400 | -2.51347000 | 0.07127700  |
| C     | 2.70444200  | 1.00442000  | -0.13958800 |
| C     | 4.11310900  | 1.01275500  | -0.15964100 |
| 50 H  | 4.62520900  | 1.93510700  | 0.10556400  |
| C     | 4.84708100  | -0.10594600 | -0.54059700 |
| C     | 4.13288500  | -1.25563800 | -0.92807900 |
| H     | 4.62738900  | -2.16051200 | -1.27249900 |
| C     | 2.75143900  | -1.22130000 | -0.86881500 |
| 55 H  | 2.19455200  | -2.10364500 | -1.17691900 |
| C     | -0.06403200 | -3.20207900 | -1.40350900 |
| H     | -0.35560800 | -2.68658500 | -2.32061100 |
| C     | 0.15282000  | -4.57195900 | -1.36324400 |
| H     | 0.02309900  | -5.16556900 | -2.26884200 |
| 60 C  | 0.54414400  | -5.16603800 | -0.15767700 |
| H     | 0.73310900  | -6.23894100 | -0.09972500 |
| C     | 0.68437900  | -4.36589100 | 0.97094800  |
| H     | 0.97845500  | -4.80796900 | 1.92280500  |

---

|      |             |             |             |
|------|-------------|-------------|-------------|
| C    | 0.44418600  | -2.98954600 | 0.88284000  |
| C    | 0.50390200  | -2.06177000 | 2.00895900  |
| C    | 0.80686400  | -2.43515900 | 3.32348500  |
| H    | 1.05313800  | -3.47299900 | 3.54814900  |
| 5 C  | 0.79165400  | -1.48500400 | 4.33789500  |
| H    | 1.03067100  | -1.76817400 | 5.36381400  |
| C    | 0.45959200  | -0.16460700 | 4.01725800  |
| H    | 0.42891000  | 0.61155700  | 4.78257600  |
| C    | 0.17007500  | 0.16344300  | 2.70087300  |
| 10 H | -0.09371300 | 1.18064400  | 2.41067900  |
| C    | 0.01997428  | 0.60058101  | -3.84395873 |
| H    | -0.37036772 | 0.45664101  | -4.87836873 |
| O    | -0.54973572 | -0.18127599 | -3.00098773 |
| O    | 0.90512028  | 1.44511401  | -3.65109273 |
| 15 O | -6.37176600 | -0.80891400 | -0.52456600 |
| O    | 6.20575600  | 0.01584500  | -0.52234200 |
| C    | -6.95619600 | -2.13980100 | -0.46525900 |
| H    | -6.78093700 | -2.60624100 | 0.51920000  |
| H    | -8.03160600 | -1.97717700 | -0.61495600 |
| 20 H | -6.55929000 | -2.78383900 | -1.26833800 |
| C    | 6.94078400  | -1.16961600 | -0.93579000 |
| H    | 7.99789600  | -0.88684000 | -0.84615600 |
| H    | 6.72289200  | -2.02361000 | -0.27185800 |
| H    | 6.71083700  | -1.43237000 | -1.98242200 |
| 25   |             |             |             |
|      |             |             |             |
| 30   |             |             |             |

## 7.6 Optimized geometries for catalytic system of Id'

### [Ru(4,4'-(OMe)<sub>2</sub>Bid)(Bpy)(Cl)]

|       |             |             |             |
|-------|-------------|-------------|-------------|
| 35 Ru | -0.04718000 | -0.31400300 | -0.37389300 |
| N     | -0.22164100 | 1.68705100  | -0.19857900 |
| N     | 2.12789500  | 2.34861100  | -0.01451800 |
| N     | 2.04478500  | -0.05857200 | -0.55300500 |
| N     | -2.65434100 | 1.95382600  | -0.23444000 |
| 40 N  | -2.14506600 | -0.46253600 | -0.22063400 |
| N     | 0.19204300  | -2.36169000 | -0.37512500 |
| N     | 0.23085400  | -0.66928900 | 1.59575500  |
| C     | 0.83305800  | 2.57080800  | -0.05202900 |
| C     | 0.28212300  | 3.93302100  | 0.08466900  |
| 45 C  | -1.11129800 | 3.82090600  | -0.00332200 |
| C     | -1.41729500 | 2.38657000  | -0.16874900 |
| C     | 0.89652000  | 5.16685300  | 0.25513700  |
| H     | 1.98366100  | 5.24854000  | 0.32127200  |
| C     | 0.07619900  | 6.30168500  | 0.33778700  |
| 50 H  | 0.52820400  | 7.28694700  | 0.47209300  |
| C     | -1.31916400 | 6.18955300  | 0.24836800  |
| H     | -1.93516600 | 7.08920900  | 0.31327900  |
| C     | -1.93116900 | 4.93904900  | 0.07663800  |
| H     | -3.01717700 | 4.84562600  | 0.00605100  |
| 55 C  | -3.01896900 | 0.62197500  | -0.26714500 |
| C     | -4.41307500 | 0.41946100  | -0.30294600 |
| H     | -5.05675100 | 1.29529800  | -0.34492700 |
| C     | -4.96950100 | -0.85491900 | -0.26260000 |
| C     | -4.08827700 | -1.94899300 | -0.16980600 |
| 60 H  | -4.43971500 | -2.97646500 | -0.11528800 |
| C     | -2.72836200 | -1.69759700 | -0.15373400 |
| H     | -2.04313300 | -2.53874200 | -0.08700500 |
| C     | 2.71868100  | 1.12438200  | -0.25490600 |

|      |             |             |             |
|------|-------------|-------------|-------------|
| C    | 4.12785400  | 1.16021800  | -0.23039700 |
| H    | 4.61318400  | 2.10224800  | 0.01555500  |
| C    | 4.89378500  | 0.04160300  | -0.54133800 |
| C    | 4.21262900  | -1.13418000 | -0.91131900 |
| 5 H  | 4.73376300  | -2.04120200 | -1.20730900 |
| C    | 2.82992100  | -1.12345100 | -0.89853600 |
| H    | 2.29874200  | -2.02477200 | -1.19560500 |
| C    | 0.08449400  | -3.19703200 | -1.44809400 |
| H    | -0.20406000 | -2.70890100 | -2.38154100 |
| 10 C | 0.33931100  | -4.55898500 | -1.37144400 |
| H    | 0.24240800  | -5.17616100 | -2.26534800 |
| C    | 0.72425100  | -5.11455000 | -0.14612200 |
| H    | 0.94023700  | -6.18036900 | -0.05849100 |
| C    | 0.82249400  | -4.28363700 | 0.96420500  |
| 15 H | 1.11116000  | -4.69418100 | 1.93149200  |
| C    | 0.54646600  | -2.91696000 | 0.83892400  |
| C    | 0.56700100  | -1.96602600 | 1.94621900  |
| C    | 0.86227200  | -2.30501500 | 3.27201900  |
| H    | 1.13195800  | -3.33153300 | 3.52075700  |
| 20 C | 0.81007500  | -1.33605900 | 4.26702000  |
| H    | 1.04278400  | -1.59281800 | 5.30129300  |
| C    | 0.44838100  | -0.03132700 | 3.91546600  |
| H    | 0.38730700  | 0.75881100  | 4.66454400  |
| C    | 0.16824400  | 0.26398800  | 2.58947300  |
| 25 H | -0.11586000 | 1.26854900  | 2.27627800  |
| O    | -6.33103800 | -0.93399200 | -0.30109200 |
| O    | 6.24913800  | 0.18656700  | -0.47944300 |
| C    | -6.87484700 | -2.28161500 | -0.23238100 |
| H    | -7.96357400 | -2.14366100 | -0.26463400 |
| 30 H | -6.54790500 | -2.88614800 | -1.09552800 |
| H    | -6.58772200 | -2.77724500 | 0.71065300  |
| C    | 7.01526000  | -0.99737500 | -0.83742600 |
| H    | 8.06447300  | -0.69531800 | -0.72155000 |
| H    | 6.78963000  | -1.83754500 | -0.15870300 |
| 35 H | 6.82336200  | -1.29085100 | -1.88350000 |
| Cl   | -0.31721900 | -0.08351100 | -2.84213200 |

**[Ru(4,4'-(OMe)<sub>2</sub>Bid)(Bpy)]<sup>+</sup>**

|      |             |             |             |
|------|-------------|-------------|-------------|
| Ru   | -0.05500900 | -0.31837300 | -0.49734000 |
| 40 N | -0.19089700 | 1.69490100  | -0.38464200 |
| N    | 2.16943600  | 2.31898300  | -0.18031500 |
| N    | 2.05446800  | -0.09778500 | -0.67250700 |
| N    | -2.61873400 | 2.00257200  | -0.37939100 |
| N    | -2.15275300 | -0.42569400 | -0.41170000 |
| 45 N | 0.13259700  | -2.37301700 | -0.53581500 |
| N    | 0.16718600  | -0.71150700 | 1.42014900  |
| C    | 0.88230600  | 2.56300500  | -0.22451100 |
| C    | 0.35207200  | 3.93078100  | -0.07710700 |
| C    | -1.04317500 | 3.84219900  | -0.15178600 |
| 50 C | -1.37691500 | 2.41635000  | -0.32520000 |
| C    | 0.98955900  | 5.15209800  | 0.09954800  |
| H    | 2.07839400  | 5.21417600  | 0.15660000  |
| C    | 0.18924500  | 6.29838400  | 0.20311700  |
| H    | 0.65842600  | 7.27443000  | 0.34461400  |
| 55 C | -1.20907100 | 6.21003400  | 0.12717300  |
| H    | -1.80891400 | 7.11894700  | 0.21014100  |
| C    | -1.84398400 | 4.97286400  | -0.05201200 |
| H    | -2.93201400 | 4.89830300  | -0.11055000 |
| C    | -3.00743800 | 0.67881400  | -0.43718800 |
| 60 C | -4.40362300 | 0.50547400  | -0.48644400 |
| H    | -5.02839400 | 1.39527400  | -0.51490700 |
| C    | -4.98735500 | -0.75729700 | -0.47197500 |
| C    | -4.12881000 | -1.87093400 | -0.38697600 |

|                                                                       |             |             |             |
|-----------------------------------------------------------------------|-------------|-------------|-------------|
| H                                                                     | -4.50289300 | -2.89090400 | -0.34464600 |
| C                                                                     | -2.76577200 | -1.65161700 | -0.35801800 |
| H                                                                     | -2.10126700 | -2.50883000 | -0.29455800 |
| C                                                                     | 2.74446600  | 1.08256000  | -0.39813600 |
| 5 C                                                                   | 4.15196800  | 1.10201700  | -0.36874100 |
| H                                                                     | 4.64756800  | 2.04437700  | -0.14653000 |
| C                                                                     | 4.90575900  | -0.03650200 | -0.63683600 |
| C                                                                     | 4.21031200  | -1.21794400 | -0.96108400 |
| H                                                                     | 4.72138500  | -2.14412500 | -1.21635000 |
| 10 C                                                                  | 2.82942600  | -1.19061800 | -0.95865400 |
| H                                                                     | 2.29091400  | -2.09875000 | -1.21714700 |
| C                                                                     | 0.04386200  | -3.17015500 | -1.63558400 |
| H                                                                     | -0.19363200 | -2.65567800 | -2.56875300 |
| C                                                                     | 0.24824900  | -4.54246900 | -1.58390500 |
| 15 H                                                                  | 0.16805300  | -5.13482400 | -2.49574100 |
| C                                                                     | 0.56016600  | -5.13903700 | -0.35744200 |
| H                                                                     | 0.73370500  | -6.21383100 | -0.28939400 |
| C                                                                     | 0.64399900  | -4.34109800 | 0.77884200  |
| H                                                                     | 0.87954900  | -4.78317100 | 1.74668100  |
| 20 C                                                                  | 0.42215600  | -2.96450500 | 0.67326900  |
| C                                                                     | 0.44175100  | -2.02185800 | 1.78285000  |
| C                                                                     | 0.68341900  | -2.36537000 | 3.11627800  |
| H                                                                     | 0.90459500  | -3.40228400 | 3.37077000  |
| C                                                                     | 0.63904500  | -1.39159700 | 4.10661300  |
| 25 H                                                                  | 0.82967700  | -1.65290300 | 5.14810100  |
| C                                                                     | 0.33952100  | -0.07583300 | 3.74083600  |
| H                                                                     | 0.28591000  | 0.71904700  | 4.48512900  |
| C                                                                     | 0.11090900  | 0.23144900  | 2.40803100  |
| H                                                                     | -0.12257000 | 1.24552300  | 2.08802100  |
| 30 O                                                                  | -6.34676800 | -0.80699400 | -0.52450400 |
| O                                                                     | 6.25959800  | 0.09370700  | -0.57652800 |
| C                                                                     | -6.92294300 | -2.14346300 | -0.48391600 |
| H                                                                     | -8.00728500 | -1.97788400 | -0.52655200 |
| H                                                                     | -6.59941200 | -2.74004100 | -1.35358600 |
| 35 H                                                                  | -6.65928000 | -2.65993200 | 0.45439900  |
| C                                                                     | 7.01449900  | -1.10926900 | -0.89885900 |
| H                                                                     | 8.06636600  | -0.81287600 | -0.79509700 |
| H                                                                     | 6.78235600  | -1.92459400 | -0.19314000 |
| H                                                                     | 6.81581300  | -1.43270500 | -1.93458100 |
| 40                                                                    |             |             |             |
| <b>[Ru(4,4'-(OMe)<sub>2</sub>Bid)(Bpy)(H<sub>2</sub>)<sup>+</sup></b> |             |             |             |
| Ru                                                                    | 0.00222500  | -0.35494900 | -0.57446800 |
| N                                                                     | 0.01568500  | 1.67505800  | -0.43113900 |
| N                                                                     | 2.42047100  | 2.12010200  | -0.29538900 |
| 45 N                                                                  | 2.12393700  | -0.31522700 | -0.59155300 |
| N                                                                     | -2.38361700 | 2.15289700  | -0.30067900 |
| N                                                                     | -2.12332900 | -0.28469900 | -0.61347500 |
| N                                                                     | -0.02302000 | -2.43020500 | -0.36440900 |
| N                                                                     | -0.00894600 | -0.56993800 | 1.48359600  |
| 50 C                                                                  | 1.15445500  | 2.45496700  | -0.29342800 |
| C                                                                     | 0.72938500  | 3.85371900  | -0.09229100 |
| C                                                                     | -0.66977100 | 3.86286100  | -0.09434100 |
| C                                                                     | -1.11296100 | 2.47009600  | -0.29702800 |
| C                                                                     | 1.45891000  | 5.02268400  | 0.08237100  |
| 55 H                                                                  | 2.55097700  | 5.00913400  | 0.08395800  |
| C                                                                     | 0.74609400  | 6.21757400  | 0.25426500  |
| H                                                                     | 1.28818900  | 7.15553800  | 0.39254700  |
| C                                                                     | -0.65701000 | 6.22665500  | 0.25234600  |
| H                                                                     | -1.18740700 | 7.17149500  | 0.38919900  |
| 60 C                                                                  | -1.38466600 | 5.04112800  | 0.07836700  |
| H                                                                     | -2.47681700 | 5.04141500  | 0.07695800  |
| C                                                                     | -2.88182300 | 0.87393900  | -0.46678100 |
| C                                                                     | -4.28779200 | 0.81820400  | -0.48290700 |



|      |             |             |             |
|------|-------------|-------------|-------------|
| H    | -4.83837000 | 1.74817800  | -0.36155900 |
| C    | -4.97208300 | -0.38199900 | -0.65497300 |
| C    | -4.20523600 | -1.55047400 | -0.82188200 |
| H    | -4.65775600 | -2.52708200 | -0.97341900 |
| 5 C  | -2.82775600 | -1.44274300 | -0.79365800 |
| H    | -2.23325200 | -2.34154800 | -0.93415000 |
| C    | 2.89964000  | 0.83342300  | -0.45895100 |
| C    | 4.30432100  | 0.75748900  | -0.48729900 |
| H    | 4.86936300  | 1.68035800  | -0.37868000 |
| 10 C | 4.96970300  | -0.45362200 | -0.65737600 |
| C    | 4.18518500  | -1.61299300 | -0.80467100 |
| H    | 4.62305600  | -2.59720400 | -0.95006600 |
| C    | 2.80961300  | -1.48550000 | -0.76547300 |
| H    | 2.20012600  | -2.37640500 | -0.89196600 |
| 15 C | -0.03668200 | -3.35002000 | -1.37227000 |
| H    | -0.02767700 | -2.94350000 | -2.38449500 |
| C    | -0.06332500 | -4.71901900 | -1.14621800 |
| H    | -0.07207500 | -5.40384500 | -1.99448800 |
| C    | -0.08143400 | -5.19172200 | 0.16840700  |
| 20 H | -0.10620400 | -6.26173300 | 0.37879900  |
| C    | -0.06832000 | -4.27106500 | 1.20943900  |
| H    | -0.08632300 | -4.61570500 | 2.24256700  |
| C    | -0.03507900 | -2.90021700 | 0.92960600  |
| C    | -0.01347400 | -1.86191800 | 1.95933800  |
| 25 C | 0.00352300  | -2.12730500 | 3.33278500  |
| H    | 0.00915700  | -3.15695200 | 3.68749100  |
| C    | 0.01692600  | -1.07601200 | 4.24213300  |
| H    | 0.03014000  | -1.27560800 | 5.31440400  |
| C    | 0.01421200  | 0.23253700  | 3.75684200  |
| 30 H | 0.02352100  | 1.08736900  | 4.43318200  |
| C    | 0.00335900  | 0.44768100  | 2.38472300  |
| H    | 0.00547500  | 1.45564200  | 1.97276600  |
| H    | -0.01304100 | 0.14403400  | -2.24078600 |
| H    | 0.07879600  | -0.69254500 | -2.27654000 |
| 35 O | -6.33152500 | -0.32058100 | -0.65269800 |
| O    | 6.32960600  | -0.41050400 | -0.67211600 |
| C    | 6.98978600  | -1.69421300 | -0.86810500 |
| H    | 8.06171800  | -1.45762100 | -0.86073800 |
| H    | 6.75259300  | -2.38840600 | -0.04447800 |
| 40 H | 6.70938000  | -2.13764400 | -1.83815600 |
| C    | -7.01038900 | -1.59531400 | -0.84432600 |
| H    | -8.07919900 | -1.34604800 | -0.82077900 |
| H    | -6.74944900 | -2.03807600 | -1.82004900 |
| H    | -6.76961600 | -2.29565700 | -0.02694300 |

45

**[Ru(4,4'-(OMe)<sub>2</sub>Bid)(Bpy)(H)]**

|      |             |             |             |
|------|-------------|-------------|-------------|
| Ru   | -0.07002200 | -0.32618600 | -0.56202600 |
| H    | -0.23546300 | -0.23864900 | -2.20412200 |
| N    | -0.25270700 | 1.68078100  | -0.41651400 |
| 50 N | 2.09747700  | 2.35052100  | -0.22816100 |
| N    | 2.02080600  | -0.06345900 | -0.73603500 |
| N    | -2.68892600 | 1.93475900  | -0.38389400 |
| N    | -2.16929300 | -0.47725000 | -0.43460800 |
| N    | 0.18606300  | -2.36493100 | -0.44701100 |
| 55 N | 0.23161300  | -0.64295100 | 1.54788800  |
| C    | 0.79925500  | 2.56603300  | -0.24692800 |
| C    | 0.24442800  | 3.91876100  | -0.05434800 |
| C    | -1.15054100 | 3.80058100  | -0.11595300 |
| C    | -1.45061500 | 2.37243300  | -0.32806700 |
| 60 C | 0.85437400  | 5.15021700  | 0.14878600  |
| H    | 1.94223700  | 5.23667600  | 0.19524500  |
| C    | 0.02933400  | 6.27616400  | 0.29090900  |
| H    | 0.47849900  | 7.25888900  | 0.45143400  |

|      |             |             |             |
|------|-------------|-------------|-------------|
| C    | -1.36699300 | 6.15776700  | 0.22854000  |
| H    | -1.98715100 | 7.04992900  | 0.34097700  |
| C    | -1.97486100 | 4.90975500  | 0.02431900  |
| H    | -3.06172000 | 4.81122400  | -0.02416100 |
| 5 C  | -3.05012600 | 0.60679800  | -0.45387200 |
| C    | -4.44569500 | 0.40063200  | -0.50036300 |
| H    | -5.09048900 | 1.27649500  | -0.52406200 |
| C    | -4.99926200 | -0.87378400 | -0.49427700 |
| C    | -4.11456800 | -1.96804300 | -0.42361900 |
| 10 H | -4.46367500 | -2.99746600 | -0.39415400 |
| C    | -2.75590300 | -1.71491300 | -0.39672900 |
| H    | -2.06879200 | -2.55588700 | -0.35306400 |
| C    | 2.69253900  | 1.13203500  | -0.47157000 |
| C    | 4.10359400  | 1.17861600  | -0.46862000 |
| 15 H | 4.58349700  | 2.13063400  | -0.25196500 |
| C    | 4.87455900  | 0.05877500  | -0.75485500 |
| C    | 4.19756400  | -1.13522900 | -1.07365500 |
| H    | 4.72253700  | -2.04910300 | -1.34067000 |
| C    | 2.81556900  | -1.13398900 | -1.04935100 |
| 20 H | 2.28825200  | -2.04785700 | -1.31296700 |
| C    | 0.09759500  | -3.24182800 | -1.49602400 |
| H    | -0.19018200 | -2.79417000 | -2.44751500 |
| C    | 0.35979300  | -4.59812800 | -1.38367500 |
| H    | 0.27531500  | -5.23662100 | -2.26380900 |
| 25 C | 0.73510900  | -5.12070500 | -0.14077500 |
| H    | 0.95677300  | -6.18211200 | -0.02112300 |
| C    | 0.81454100  | -4.25673100 | 0.94434700  |
| H    | 1.09511600  | -4.64186400 | 1.92417600  |
| C    | 0.53398500  | -2.89318900 | 0.78624800  |
| 30 C | 0.56371700  | -1.93226400 | 1.89273900  |
| C    | 0.88105000  | -2.27310400 | 3.21569000  |
| H    | 1.14592800  | -3.29842500 | 3.47269500  |
| C    | 0.85813500  | -1.29565500 | 4.20423200  |
| H    | 1.10613200  | -1.55103400 | 5.23574000  |
| 35 C | 0.51092500  | 0.01316200  | 3.85522300  |
| H    | 0.47854300  | 0.80708900  | 4.60217700  |
| C    | 0.20775600  | 0.29523900  | 2.52915600  |
| H    | -0.07140500 | 1.30230100  | 2.21192200  |
| O    | -6.36244400 | -0.95678400 | -0.54284100 |
| 40 O | 6.23151500  | 0.21572400  | -0.71831900 |
| C    | -6.89987700 | -2.30737500 | -0.51808400 |
| H    | -7.98905100 | -2.17442700 | -0.55909900 |
| H    | -6.56010800 | -2.88635500 | -1.39390200 |
| H    | -6.62205200 | -2.82959600 | 0.41352100  |
| 45 C | 6.99927300  | -0.97188700 | -1.05624300 |
| H    | 8.04833600  | -0.65759500 | -0.97618100 |
| H    | 6.79867700  | -1.79247700 | -0.34623200 |
| H    | 6.78549700  | -1.30205700 | -2.08721200 |

50 **TS = [Ru(4,4'-(OMe)<sub>2</sub> Bid)(Bpy)(H-H-NMe<sub>3</sub>)<sup>+</sup>**

|      |             |             |             |
|------|-------------|-------------|-------------|
| N    | 0.16135800  | 1.54280900  | 0.18261700  |
| N    | 2.56019700  | 2.00721400  | 0.05260300  |
| N    | 2.24400900  | -0.43165600 | -0.16040100 |
| N    | -2.20943100 | 1.96405500  | 0.62769600  |
| 55 N | -1.97871800 | -0.32849400 | -0.26083900 |
| N    | 0.04280300  | -2.50011600 | -0.31427700 |
| N    | -0.00473100 | -0.98391800 | 1.81891400  |
| C    | 1.30406700  | 2.32379500  | 0.25895900  |
| C    | 0.90584800  | 3.68693200  | 0.66194800  |
| 60 C | -0.48133500 | 3.66591700  | 0.85809000  |
| C    | -0.94034100 | 2.29850900  | 0.54560400  |
| C    | 1.64505900  | 4.84549400  | 0.86296300  |
| H    | 2.72621600  | 4.85670500  | 0.70877800  |

---

|      |             |             |             |
|------|-------------|-------------|-------------|
| C    | 0.95751200  | 5.99912200  | 1.26753800  |
| H    | 1.50889400  | 6.92728000  | 1.43288500  |
| C    | -0.43121200 | 5.97808600  | 1.46398800  |
| H    | -0.94226000 | 6.88971400  | 1.78142600  |
| 5 C  | -1.17013900 | 4.80359700  | 1.25936400  |
| H    | -2.25141000 | 4.78211000  | 1.41171900  |
| C    | -2.72344900 | 0.74959200  | 0.21267600  |
| C    | -4.13032100 | 0.69001900  | 0.24047700  |
| H    | -4.67402100 | 1.55091900  | 0.62323800  |
| 10 C | -4.82549700 | -0.41776800 | -0.23543000 |
| C    | -4.07367500 | -1.48278000 | -0.76942100 |
| H    | -4.53941200 | -2.37100300 | -1.18921500 |
| C    | -2.69465800 | -1.38449600 | -0.75362400 |
| H    | -2.10615600 | -2.19906700 | -1.17115000 |
| 15 C | 3.02338600  | 0.72389100  | -0.16997900 |
| C    | 4.41773000  | 0.64835000  | -0.35454200 |
| H    | 4.98572100  | 1.57597600  | -0.36634300 |
| C    | 5.07279600  | -0.57240900 | -0.48708900 |
| C    | 4.29411700  | -1.74297100 | -0.40688400 |
| 20 H | 4.73013900  | -2.73687100 | -0.46791700 |
| C    | 2.92662000  | -1.61400900 | -0.24918600 |
| H    | 2.31947500  | -2.51456500 | -0.19601600 |
| C    | 0.11860200  | -3.23965100 | -1.46023400 |
| H    | 0.27885200  | -2.66693000 | -2.37528800 |
| 25 C | -0.00425500 | -4.62130800 | -1.47941900 |
| H    | 0.06447200  | -5.15519600 | -2.42778100 |
| C    | -0.21856100 | -5.30353700 | -0.27745500 |
| H    | -0.32579800 | -6.38895200 | -0.26125400 |
| C    | -0.29060300 | -4.57200000 | 0.90246000  |
| 30 H | -0.45058600 | -5.08359000 | 1.85147400  |
| C    | -0.15305400 | -3.17918600 | 0.87241200  |
| C    | -0.17229300 | -2.33005200 | 2.06418100  |
| C    | -0.32324800 | -2.81494100 | 3.36859700  |
| H    | -0.45674300 | -3.88205800 | 3.54195600  |
| 35 C | -0.30119300 | -1.93227800 | 4.44267300  |
| H    | -0.42029900 | -2.30241400 | 5.46195700  |
| C    | -0.11857500 | -0.56993900 | 4.19301500  |
| H    | -0.08929200 | 0.15555000  | 5.00641200  |
| C    | 0.02562200  | -0.13631500 | 2.88152000  |
| 40 H | 0.17610700  | 0.91779100  | 2.64609000  |
| H    | -0.15357400 | 0.43051700  | -2.10221200 |
| H    | 0.33274700  | -0.31809700 | -1.88638900 |
| N    | -0.65793000 | 1.37864100  | -3.09519800 |
| Ru   | 0.13014300  | -0.44660400 | -0.18393800 |
| 45 C | -0.53445600 | 0.57292300  | -4.32229800 |
| H    | 0.50484600  | 0.21826700  | -4.42103900 |
| H    | -1.20254200 | -0.30165800 | -4.24638200 |
| H    | -0.80363400 | 1.15763600  | -5.22187600 |
| C    | 0.27847900  | 2.51555100  | -3.12102700 |
| 50 H | 0.12441200  | 3.13395800  | -2.22356300 |
| H    | 1.31355700  | 2.13377000  | -3.12206200 |
| H    | 0.12619900  | 3.14322000  | -4.02017800 |
| C    | -2.04627900 | 1.83515900  | -2.91252000 |
| H    | -2.71483100 | 0.96193200  | -2.84550400 |
| 55 H | -2.12159200 | 2.42402100  | -1.98579600 |
| H    | -2.37122000 | 2.46669100  | -3.76293600 |
| O    | 6.42360800  | -0.52994900 | -0.66337400 |
| O    | -6.18521500 | -0.36679900 | -0.16081700 |
| C    | 7.07188000  | -1.82683000 | -0.79518100 |
| 60 H | 6.68810900  | -2.37203300 | -1.67415300 |
| H    | 8.13525400  | -1.59274200 | -0.93528100 |
| H    | 6.93663700  | -2.43014100 | 0.11833100  |
| C    | -6.88149100 | -1.54170000 | -0.66411200 |

---

|                                                                      |             |             |             |
|----------------------------------------------------------------------|-------------|-------------|-------------|
| H                                                                    | -7.94560200 | -1.31876000 | -0.51159200 |
| H                                                                    | -6.67990100 | -1.69333500 | -1.73806500 |
| H                                                                    | -6.60158400 | -2.44242900 | -0.09168100 |
| <b>5 TS = [Ru(4,4'-(OMe)<sub>2</sub>Bid)(Bpy)(H-CO<sub>2</sub>)]</b> |             |             |             |
| Ru                                                                   | -0.12686800 | -0.31496600 | -0.32042900 |
| H                                                                    | -0.31328600 | -0.06359300 | -1.97922200 |
| N                                                                    | -0.30359600 | 1.67929200  | -0.07251700 |
| N                                                                    | 2.03943700  | 2.33401100  | 0.20991200  |
| 10 N                                                                 | 1.97682400  | -0.06158200 | -0.38209700 |
| N                                                                    | -2.73138400 | 1.95875400  | -0.22757700 |
| N                                                                    | -2.22871500 | -0.45790100 | -0.24829600 |
| N                                                                    | 0.09988300  | -2.35753200 | -0.39902300 |
| N                                                                    | 0.09904100  | -0.82036700 | 1.72100900  |
| 15 C                                                                 | 0.74572500  | 2.55806900  | 0.13552700  |
| C                                                                    | 0.19342900  | 3.91875200  | 0.27371100  |
| C                                                                    | -1.19490800 | 3.81374900  | 0.11876100  |
| C                                                                    | -1.49622400 | 2.38452400  | -0.08858200 |
| C                                                                    | 0.80254200  | 5.14692700  | 0.49709600  |
| 20 H                                                                 | 1.88559200  | 5.22314800  | 0.61604900  |
| C                                                                    | -0.01741700 | 6.28320500  | 0.56407400  |
| H                                                                    | 0.43084700  | 7.26387800  | 0.73883200  |
| C                                                                    | -1.40732600 | 6.17832200  | 0.40727100  |
| H                                                                    | -2.02308400 | 7.07893300  | 0.46099400  |
| 25 C                                                                 | -2.01422000 | 4.93358400  | 0.18236000  |
| H                                                                    | -3.09603200 | 4.84592200  | 0.05895200  |
| C                                                                    | -3.10019500 | 0.63107200  | -0.29472400 |
| C                                                                    | -4.49431400 | 0.43358500  | -0.37022300 |
| H                                                                    | -5.13343900 | 1.31254700  | -0.41690000 |
| 30 C                                                                 | -5.05614600 | -0.83818000 | -0.35679400 |
| C                                                                    | -4.18103000 | -1.93658900 | -0.24896400 |
| H                                                                    | -4.53790600 | -2.96286900 | -0.20787900 |
| C                                                                    | -2.82104000 | -1.69179400 | -0.20047400 |
| H                                                                    | -2.14004600 | -2.53564200 | -0.12551100 |
| 35 C                                                                 | 2.63880900  | 1.11576600  | -0.02960700 |
| C                                                                    | 4.04657400  | 1.14945700  | 0.05986000  |
| H                                                                    | 4.51878500  | 2.08787700  | 0.34220000  |
| C                                                                    | 4.82595400  | 0.03507900  | -0.22797100 |
| C                                                                    | 4.16131100  | -1.13798000 | -0.63700800 |
| 40 H                                                                 | 4.69535900  | -2.04406400 | -0.91193400 |
| C                                                                    | 2.78049900  | -1.12578400 | -0.69387900 |
| H                                                                    | 2.26588300  | -2.02405800 | -1.02678400 |
| C                                                                    | 0.01334300  | -3.12683900 | -1.52559600 |
| H                                                                    | -0.25678000 | -2.58917000 | -2.43495000 |
| 45 C                                                                 | 0.26114600  | -4.49160100 | -1.53392300 |
| H                                                                    | 0.18161200  | -5.04711900 | -2.46908200 |
| C                                                                    | 0.61589500  | -5.12937500 | -0.34006400 |
| H                                                                    | 0.82731600  | -6.19933100 | -0.31778700 |
| C                                                                    | 0.68564000  | -4.37294700 | 0.82418400  |
| 50 H                                                                 | 0.94494100  | -4.85076700 | 1.76904700  |
| C                                                                    | 0.41818000  | -2.99913700 | 0.78607900  |
| C                                                                    | 0.42274200  | -2.13501800 | 1.96861700  |
| C                                                                    | 0.70487100  | -2.57939600 | 3.26727300  |
| H                                                                    | 0.96551500  | -3.62226200 | 3.44514100  |
| 55 C                                                                 | 0.65347300  | -1.68383800 | 4.32988900  |
| H                                                                    | 0.87619000  | -2.02006700 | 5.34371500  |
| C                                                                    | 0.31114900  | -0.35185000 | 4.07812300  |
| H                                                                    | 0.25694700  | 0.38017400  | 4.88452800  |
| C                                                                    | 0.04259700  | 0.03764000  | 2.77213600  |
| 60 H                                                                 | -0.22904000 | 1.06589400  | 2.52660900  |
| C                                                                    | 0.93485500  | 0.38320800  | -3.07138500 |
| O                                                                    | 0.94758100  | 1.57269900  | -3.01261900 |
| O                                                                    | 1.27321600  | -0.67163000 | -3.51178900 |

|      |             |             |             |
|------|-------------|-------------|-------------|
| O    | -6.41743200 | -0.91242300 | -0.43254800 |
| O    | 6.17825900  | 0.17824400  | -0.10520000 |
| C    | -6.96635100 | -2.25845600 | -0.38996400 |
| H    | -6.71068900 | -2.76223700 | 0.55784200  |
| 5 H  | -8.05328700 | -2.11763000 | -0.45493300 |
| H    | -6.61417700 | -2.85813700 | -1.24663300 |
| C    | 6.95848200  | -0.99971500 | -0.45130200 |
| H    | 8.00241400  | -0.69863700 | -0.29274900 |
| H    | 6.71063900  | -1.84954100 | 0.20741300  |
| 10 H | 6.80621400  | -1.27924400 | -1.50773100 |

**[Ru(4,4'-(OMe)<sub>2</sub>Bid)(Bpy)(H-CO<sub>2</sub>)]**

|      |             |             |             |
|------|-------------|-------------|-------------|
| Ru   | -0.00716600 | -0.34429400 | -0.25369300 |
| N    | -0.12337700 | 1.65834900  | -0.00801200 |
| 15 N | 2.24707900  | 2.26911200  | 0.04105900  |
| N    | 2.08815600  | -0.13473300 | -0.49882000 |
| N    | -2.54763500 | 1.99531400  | 0.01982700  |
| N    | -2.11506600 | -0.43265200 | -0.07866300 |
| N    | 0.14575400  | -2.39487700 | -0.35816700 |
| 20 N | 0.28989900  | -0.81145800 | 1.68902500  |
| C    | 0.95933800  | 2.51636700  | 0.08923100  |
| C    | 0.44937200  | 3.88853100  | 0.27113800  |
| C    | -0.94791800 | 3.81234300  | 0.24924100  |
| C    | -1.29881900 | 2.39011900  | 0.07352200  |
| 25 C | 1.10406000  | 5.10347400  | 0.42577400  |
| H    | 2.19487300  | 5.15612100  | 0.43793100  |
| C    | 0.31830400  | 6.25672600  | 0.56350800  |
| H    | 0.80113800  | 7.22845000  | 0.68828500  |
| C    | -1.08236100 | 6.18069000  | 0.54067700  |
| 30 H | -1.67083200 | 7.09464900  | 0.64729700  |
| C    | -1.73448400 | 4.94932600  | 0.38154900  |
| H    | -2.82455200 | 4.88467700  | 0.36015200  |
| C    | -2.95326100 | 0.67779700  | -0.06972600 |
| C    | -4.35130000 | 0.52103400  | -0.12306300 |
| 35 H | -4.96741800 | 1.41729700  | -0.12415800 |
| C    | -4.94607800 | -0.73600400 | -0.16506900 |
| C    | -4.09846300 | -1.85937400 | -0.12457000 |
| H    | -4.48069100 | -2.87710300 | -0.13105700 |
| C    | -2.73286000 | -1.65185100 | -0.08155400 |
| 40 H | -2.07674900 | -2.51736600 | -0.05473100 |
| C    | 2.79906000  | 1.03639300  | -0.24373200 |
| C    | 4.20636500  | 1.04882500  | -0.30495500 |
| H    | 4.72023800  | 1.98437700  | -0.09600300 |
| C    | 4.93517500  | -0.08584600 | -0.64588700 |
| 45 C | 4.21500800  | -1.25787400 | -0.94754200 |
| H    | 4.70404700  | -2.18023400 | -1.25065000 |
| C    | 2.83645500  | -1.22276900 | -0.85912400 |
| H    | 2.27679400  | -2.12198200 | -1.10361000 |
| C    | -0.00239400 | -3.15630900 | -1.47941600 |
| 50 H | -0.26925400 | -2.60760000 | -2.38504200 |
| C    | 0.17415200  | -4.53315000 | -1.47900400 |
| H    | 0.04672100  | -5.09301200 | -2.40594500 |
| C    | 0.65636700  | -4.41838700 | 0.87240100  |
| H    | 0.91498100  | -4.90007800 | 1.81543900  |
| 55 C | 0.46047000  | -3.03408700 | 0.82239300  |
| C    | 0.54312200  | -2.14000800 | 1.97412700  |
| C    | 0.83200600  | -2.55297400 | 3.27922800  |
| H    | 1.03076500  | -3.60509500 | 3.48178500  |
| C    | 0.59695400  | -0.28227800 | 4.02079300  |
| 60 H | 0.60744400  | 0.47939100  | 4.80077700  |
| C    | 0.31650100  | 0.08696300  | 2.71264900  |
| H    | 0.10283200  | 1.12080600  | 2.44261500  |
| C    | -0.69553500 | 0.44180500  | -2.83016800 |

|      |             |             |             |
|------|-------------|-------------|-------------|
| H    | -0.01676000 | -0.20688400 | -2.11298400 |
| O    | -1.71938300 | -0.15457800 | -3.20166300 |
| O    | -0.18704400 | 1.53015400  | -3.13884600 |
| C    | 0.51834600  | -5.17672300 | -0.28547000 |
| 5 H  | 0.67260400  | -6.25626600 | -0.25829200 |
| C    | 0.86340600  | -1.62286800 | 4.31213100  |
| H    | 1.09078500  | -1.93823300 | 5.33120700  |
| O    | -6.30689600 | -0.77113500 | -0.22638700 |
| O    | 6.29155700  | 0.03959800  | -0.67189300 |
| 10 C | 7.02040900  | -1.16382400 | -1.04546600 |
| H    | 8.07780700  | -0.87154000 | -1.00563900 |
| H    | 6.82925600  | -1.98201700 | -0.33060200 |
| H    | 6.75764100  | -1.48231000 | -2.06843300 |
| C    | -6.89073600 | -2.10270100 | -0.29104800 |
| 15 H | -6.65270100 | -2.68598900 | 0.61456900  |
| H    | -7.97309900 | -1.92781400 | -0.34688200 |
| H    | -6.54897200 | -2.63919100 | -1.19236900 |

**[Ru(4,4'-(OMe)<sub>2</sub> Bid)(Bpy)(O-COH)]**

|       |             |             |             |
|-------|-------------|-------------|-------------|
| 20 Ru | -0.08913100 | -0.35257000 | -0.27492800 |
| N     | -0.21585800 | 1.64771500  | -0.07574100 |
| N     | 2.14718500  | 2.23003600  | 0.16823600  |
| N     | 1.99942500  | -0.15487600 | -0.46139400 |
| N     | -2.63458000 | 1.98619500  | -0.20645800 |
| 25 N  | -2.19439100 | -0.44168700 | -0.14851800 |
| N     | 0.08715500  | -2.39829500 | -0.31261700 |
| N     | 0.19486200  | -0.75044200 | 1.68850500  |
| C     | 0.86112200  | 2.49332200  | 0.12902000  |
| C     | 0.34543500  | 3.86437300  | 0.30254500  |
| 30 C  | -1.04710200 | 3.79872300  | 0.16009200  |
| C     | -1.38940500 | 2.38113700  | -0.06815200 |
| C     | 0.98927000  | 5.07148500  | 0.54111800  |
| H     | 2.07526700  | 5.11671800  | 0.64836000  |
| C     | 0.20042200  | 6.22711700  | 0.63970500  |
| 35 H  | 0.67623700  | 7.19190400  | 0.82919200  |
| C     | -1.19319200 | 6.16193300  | 0.49529600  |
| H     | -1.78425000 | 7.07719600  | 0.57292800  |
| C     | -1.83527700 | 4.93849600  | 0.25206400  |
| H     | -2.92004000 | 4.88250800  | 0.13683700  |
| 40 C  | -3.03326600 | 0.66535500  | -0.26967200 |
| C     | -4.42561600 | 0.49695800  | -0.40475200 |
| H     | -5.04258900 | 1.38673500  | -0.50942900 |
| C     | -5.01644600 | -0.76236500 | -0.37688600 |
| C     | -4.17603100 | -1.87509800 | -0.17747800 |
| 45 H  | -4.56071800 | -2.88975300 | -0.10795800 |
| C     | -2.81408500 | -1.65900100 | -0.07578900 |
| H     | -2.15753400 | -2.51347000 | 0.07127700  |
| C     | 2.70444200  | 1.00442000  | -0.13958800 |
| C     | 4.11310900  | 1.01275500  | -0.15964100 |
| 50 H  | 4.62520900  | 1.93510700  | 0.10556400  |
| C     | 4.84708100  | -0.10594600 | -0.54059700 |
| C     | 4.13288500  | -1.25563800 | -0.92807900 |
| H     | 4.62738900  | -2.16051200 | -1.27249900 |
| C     | 2.75143900  | -1.22130000 | -0.86881500 |
| 55 H  | 2.19455200  | -2.10364500 | -1.17691900 |
| C     | -0.06403200 | -3.20207900 | -1.40350900 |
| H     | -0.35560800 | -2.68658500 | -2.32061100 |
| C     | 0.15282000  | -4.57195900 | -1.36324400 |
| H     | 0.02309900  | -5.16556900 | -2.26884200 |
| 60 C  | 0.54414400  | -5.16603800 | -0.15767700 |
| H     | 0.73310900  | -6.23894100 | -0.09972500 |
| C     | 0.68437900  | -4.36589100 | 0.97094800  |
| H     | 0.97845500  | -4.80796900 | 1.92280500  |

|      |             |             |             |
|------|-------------|-------------|-------------|
| C    | 0.44418600  | -2.98954600 | 0.88284000  |
| C    | 0.50390200  | -2.06177000 | 2.00895900  |
| C    | 0.80686400  | -2.43515900 | 3.32348500  |
| H    | 1.05313800  | -3.47299900 | 3.54814900  |
| 5 C  | 0.79165400  | -1.48500400 | 4.33789500  |
| H    | 1.03067100  | -1.76817400 | 5.36381400  |
| C    | 0.45959200  | -0.16460700 | 4.01725800  |
| H    | 0.42891000  | 0.61155700  | 4.78257600  |
| C    | 0.17007500  | 0.16344300  | 2.70087300  |
| 10 H | -0.09371300 | 1.18064400  | 2.41067900  |
| C    | 0.12526100  | 0.56142600  | -3.22082600 |
| H    | -0.26508100 | 0.41748600  | -4.25523600 |
| O    | -0.44444900 | -0.22043100 | -2.37785500 |
| O    | 1.01040700  | 1.40595900  | -3.02796000 |
| 15 O | -6.37176600 | -0.80891400 | -0.52456600 |
| O    | 6.20575600  | 0.01584500  | -0.52234200 |
| C    | -6.95619600 | -2.13980100 | -0.46525900 |
| H    | -6.78093700 | -2.60624100 | 0.51920000  |
| H    | -8.03160600 | -1.97717700 | -0.61495600 |
| 20 H | -6.55929000 | -2.78383900 | -1.26833800 |
| C    | 6.94078400  | -1.16961600 | -0.93579000 |
| H    | 7.99789600  | -0.88684000 | -0.84615600 |
| H    | 6.72289200  | -2.02361000 | -0.27185800 |
| H    | 6.71083700  | -1.43237000 | -1.98242200 |

25  
**TS = [Ru(4,4'-(OMe)<sub>2</sub> Bid)(Bpy)(-DCO<sub>3</sub>)**

|      |             |             |             |
|------|-------------|-------------|-------------|
| Ru   | -0.03399100 | -0.31886600 | -0.28837100 |
| N    | -0.14340900 | 1.69389900  | -0.13259900 |
| N    | 2.22425100  | 2.29322900  | 0.05394800  |
| 30 N | 2.09241900  | -0.13651400 | -0.36494800 |
| N    | -2.56965700 | 2.02679200  | -0.11030700 |
| N    | -2.13548200 | -0.40376900 | -0.13479000 |
| N    | 0.11819200  | -2.36314400 | -0.37952700 |
| N    | 0.15775900  | -0.76135600 | 1.62726300  |
| 35 C | 0.93793600  | 2.54773100  | 0.01986000  |
| C    | 0.42295400  | 3.92143200  | 0.17620000  |
| C    | -0.97355700 | 3.84712500  | 0.11148200  |
| C    | -1.32167400 | 2.42458900  | -0.06627100 |
| C    | 1.07318400  | 5.13505100  | 0.35968400  |
| 40 H | 2.16302600  | 5.18596500  | 0.40938400  |
| C    | 0.28495500  | 6.28832000  | 0.48031400  |
| H    | 0.76473000  | 7.25840400  | 0.62796200  |
| C    | -1.11464600 | 6.21417800  | 0.41433200  |
| H    | -1.70530500 | 7.12784600  | 0.51182000  |
| 45 C | -1.76248500 | 4.98453500  | 0.22817400  |
| H    | -2.85166600 | 4.92066400  | 0.17771500  |
| C    | -2.97562500 | 0.70746100  | -0.15524700 |
| C    | -4.37470000 | 0.55019400  | -0.18272700 |
| H    | -4.99074200 | 1.44628400  | -0.20526300 |
| 50 C | -4.97092500 | -0.70686100 | -0.16491800 |
| C    | -4.12376500 | -1.82873200 | -0.09656600 |
| H    | -4.50647600 | -2.84568200 | -0.05995400 |
| C    | -2.75652600 | -1.62068600 | -0.08348100 |
| H    | -2.09994700 | -2.48554400 | -0.03944700 |
| 55 C | 2.78831200  | 1.04768000  | -0.13957100 |
| C    | 4.19742700  | 1.06322700  | -0.12513700 |
| H    | 4.69761800  | 2.01134000  | 0.05906500  |
| C    | 4.94442400  | -0.08433300 | -0.36886500 |
| C    | 4.24134300  | -1.27388700 | -0.63743500 |
| 60 H | 4.74520800  | -2.21012400 | -0.86399100 |
| C    | 2.85899800  | -1.23875100 | -0.62127900 |
| H    | 2.31780100  | -2.15365300 | -0.84817100 |
| C    | 0.02661400  | -3.12196100 | -1.50685400 |

|      |             |             |             |
|------|-------------|-------------|-------------|
| H    | -0.19293100 | -2.57276600 | -2.42512600 |
| C    | 0.21200700  | -4.49800000 | -1.49598900 |
| H    | 0.13355700  | -5.06025400 | -2.42691700 |
| C    | 0.50346500  | -5.13832000 | -0.28607500 |
| 5 H  | 0.66232100  | -6.21706100 | -0.25194600 |
| C    | 0.58575400  | -4.37964300 | 0.87736800  |
| H    | 0.80453100  | -4.85787000 | 1.83217500  |
| C    | 0.38474300  | -2.99691500 | 0.81539300  |
| C    | 0.40613400  | -2.08765100 | 1.95375600  |
| 10 C | 0.62544900  | -2.47481000 | 3.27949500  |
| H    | 0.82639100  | -3.52230700 | 3.50573900  |
| C    | 0.58547400  | -1.53036400 | 4.29826300  |
| H    | 0.75928600  | -1.82585600 | 5.33356300  |
| C    | 0.31237800  | -0.19856100 | 3.96850400  |
| 15 H | 0.26361800  | 0.57430800  | 4.73607400  |
| C    | 0.10469800  | 0.15131400  | 2.64287400  |
| H    | -0.10742200 | 1.17818300  | 2.34769000  |
| C    | -0.28794300 | 0.23217200  | -3.54337200 |
| H    | -0.37515200 | 0.42227700  | -4.64430500 |
| 20 O | -1.37391100 | 0.10462300  | -2.92349300 |
| O    | 0.87209200  | 0.16065600  | -3.06302600 |
| C    | -6.91899100 | -2.07414500 | -0.17494300 |
| H    | -6.60731600 | -2.66005400 | -1.05634600 |
| H    | -6.65207800 | -2.60880700 | 0.75254400  |
| 25 H | -8.00267800 | -1.90080000 | -0.20603800 |
| C    | 7.04488000  | -1.16468100 | -0.65721500 |
| H    | 6.84364300  | -1.96032900 | 0.08003800  |
| H    | 6.80613900  | -1.51909400 | -1.67430000 |
| H    | 8.09976200  | -0.86502900 | -0.60462400 |
| 30 O | -6.33362700 | -0.74254300 | -0.19938000 |
| O    | 6.30161800  | 0.04549700  | -0.34037300 |

**TS = [Ru(4,4'-(OMe)<sub>2</sub> Bid)(Bpy)(H-H-DCHD)]**

|      |             |             |             |
|------|-------------|-------------|-------------|
| Ru   | -0.15431900 | -0.34544000 | -0.28696100 |
| 35 N | -0.22105200 | 1.67261800  | -0.15496300 |
| N    | 2.13474900  | 2.19884500  | 0.25977600  |
| N    | 1.96157900  | -0.22052700 | -0.20408800 |
| N    | -2.62860700 | 2.07832500  | -0.35395500 |
| N    | -2.26693800 | -0.36313000 | -0.40019700 |
| 40 N | -0.05738800 | -2.40019700 | -0.18074100 |
| N    | -0.16969500 | -0.66291800 | 1.76482600  |
| C    | 0.86266400  | 2.49040400  | 0.12469400  |
| C    | 0.37368400  | 3.87457000  | 0.27419900  |
| C    | -1.01146800 | 3.84284800  | 0.07309800  |
| 45 C | -1.37726000 | 2.43567000  | -0.17929500 |
| C    | 1.03582000  | 5.06444100  | 0.54700600  |
| H    | 2.11687000  | 5.08265100  | 0.70154300  |
| C    | 0.27138000  | 6.23834500  | 0.61670700  |
| H    | 0.76152000  | 7.19099200  | 0.82958600  |
| 50 C | -1.11645000 | 6.20678800  | 0.41440000  |
| H    | -1.68829800 | 7.13565700  | 0.47159600  |
| C    | -1.77656700 | 5.00019500  | 0.13901000  |
| H    | -2.85662100 | 4.96979100  | -0.02093300 |
| C    | -3.06695300 | 0.77615900  | -0.48065300 |
| 55 C | -4.46007600 | 0.66401200  | -0.66526600 |
| H    | -5.04325000 | 1.57982200  | -0.73291300 |
| C    | -5.09141800 | -0.57222800 | -0.74662400 |
| C    | -4.28987700 | -1.72334600 | -0.62151500 |
| H    | -4.70423900 | -2.72783000 | -0.65583400 |
| 60 C | -2.92716700 | -1.56045500 | -0.45546900 |
| H    | -2.30325900 | -2.44630200 | -0.37109400 |
| C    | 2.67758700  | 0.94529400  | 0.05974200  |
| C    | 4.08600000  | 0.93107900  | 0.10570700  |



---

|      |             |             |             |
|------|-------------|-------------|-------------|
| H    | 4.60105800  | 1.86690600  | 0.31029100  |
| C    | 4.81437200  | -0.22860800 | -0.13484600 |
| C    | 4.09344800  | -1.40405200 | -0.41862400 |
| H    | 4.58258300  | -2.35210200 | -0.62749300 |
| 5 C  | 2.71226300  | -1.34030300 | -0.43390900 |
| H    | 2.15519300  | -2.24284800 | -0.66917300 |
| C    | -0.05347400 | -3.26147300 | -1.24109800 |
| H    | -0.16986200 | -2.79515600 | -2.22006700 |
| C    | 0.09258800  | -4.63398400 | -1.10122200 |
| 10 H | 0.09321600  | -5.26818800 | -1.98837600 |
| C    | 0.24173400  | -5.17752400 | 0.17917300  |
| H    | 0.36781500  | -6.25181400 | 0.32040300  |
| C    | 0.21944900  | -4.32173600 | 1.27459100  |
| H    | 0.32131500  | -4.72273000 | 2.28280700  |
| 15 C | 0.06295700  | -2.94389100 | 1.08349600  |
| C    | -0.01322200 | -1.97033200 | 2.17234600  |
| C    | 0.03583800  | -2.30536500 | 3.53093600  |
| H    | 0.16431000  | -3.34457200 | 3.83242700  |
| C    | -0.08197700 | -1.30960700 | 4.49405100  |
| 20 H | -0.04316000 | -1.56180600 | 5.55472700  |
| C    | -0.25547300 | 0.01366300  | 4.07914000  |
| H    | -0.35686400 | 0.82395200  | 4.80161600  |
| C    | -0.29444100 | 0.29670700  | 2.72010800  |
| H    | -0.42783300 | 1.31566500  | 2.35472200  |
| 25 C | 2.33392200  | 0.08865700  | -3.34578700 |
| H    | 3.27708700  | -0.25216200 | -3.83177500 |
| O    | 1.47139200  | -0.85876700 | -3.19998400 |
| O    | 2.20655300  | 1.27247900  | -3.01727100 |
| O    | -6.44328600 | -0.56360100 | -0.92837700 |
| 30 O | 6.17385300  | -0.12536300 | -0.08265700 |
| C    | -7.06270400 | -1.87689000 | -1.02344500 |
| H    | -6.92313100 | -2.44957000 | -0.09085600 |
| H    | -8.12969300 | -1.67005000 | -1.17894600 |
| H    | -6.66095600 | -2.44130800 | -1.88203900 |
| 35 C | 6.89817800  | -1.35012900 | -0.38546800 |
| H    | 7.95790100  | -1.07433900 | -0.30527600 |
| H    | 6.66117900  | -2.14381300 | 0.34330500  |
| H    | 6.67736800  | -1.69645800 | -1.40948300 |
| H    | 0.50398800  | -0.44765700 | -2.40956200 |
| 40 H | -0.28099400 | -0.12991400 | -2.00231800 |

45

50

55

60

5

10

15

## 20 7.7 Optimized geometries for catalytic system of lw'

### [Ru(4,4'-(COOMe)<sub>2</sub>Bid)(Bpy)(Cl)]

|      |             |             |             |
|------|-------------|-------------|-------------|
| Ru   | 0.56208600  | -0.85838400 | 0.19545600  |
| N    | 2.52233800  | -0.38141700 | 0.19008700  |
| 25 N | 2.70493900  | 0.85667500  | 2.28915500  |
| N    | 0.46056600  | -0.16140400 | 2.18791600  |
| N    | 3.23049500  | -1.36526600 | -1.93227400 |
| N    | 0.77673000  | -1.56721000 | -1.77656100 |
| N    | -1.46213800 | -1.16859800 | 0.18797900  |
| 30 N | -0.08626300 | 0.95506300  | -0.40201800 |
| C    | 3.16951600  | 0.35095200  | 1.16824700  |
| C    | 4.57890000  | 0.51766900  | 0.76719000  |
| C    | 4.73924100  | -0.15547500 | -0.45094900 |
| C    | 3.42139900  | -0.71063300 | -0.81137800 |
| 35 C | 5.64415500  | 1.16605600  | 1.37851000  |
| H    | 5.51381700  | 1.68805200  | 2.32897300  |
| C    | 6.88970200  | 1.12818200  | 0.73489600  |
| H    | 7.74774100  | 1.62964900  | 1.18787000  |
| C    | 7.05034100  | 0.45362800  | -0.48453000 |
| 40 H | 8.03150600  | 0.43744600  | -0.96394600 |
| C    | 5.96919200  | -0.19911300 | -1.09432800 |
| H    | 6.08910600  | -0.72650300 | -2.04322400 |
| C    | 2.00116400  | -1.78042900 | -2.39775800 |
| C    | 2.05858600  | -2.42910400 | -3.65844300 |
| 45 H | 3.05006500  | -2.58342000 | -4.08215000 |
| C    | -0.32112900 | -2.54467700 | -3.72384400 |
| H    | -1.26260200 | -2.80588300 | -4.20748500 |
| C    | -0.34065700 | -1.93365400 | -2.48248500 |
| H    | -1.29331400 | -1.72307700 | -2.00359300 |
| 50 C | 1.44426100  | 0.61471300  | 2.78908300  |
| C    | 1.21356200  | 1.19510900  | 4.06405200  |
| H    | 2.01487500  | 1.81004000  | 4.47170400  |
| C    | -0.91210600 | 0.12272400  | 4.18401200  |
| H    | -1.83977800 | -0.12687500 | 4.69929900  |
| 55 C | -0.66738900 | -0.40498000 | 2.92874100  |
| H    | -1.39635300 | -1.07181700 | 2.47496600  |
| C    | -2.11456500 | -2.34586800 | 0.41964200  |
| H    | -1.46511000 | -3.20726700 | 0.58715300  |
| C    | -3.49491000 | -2.44510300 | 0.46002000  |
| 60 H | -3.96562500 | -3.40784800 | 0.65474800  |
| C    | -4.27023500 | -1.29480800 | 0.25591100  |
| C    | -3.62256200 | -0.08836700 | 0.00232900  |
| H    | -4.22143800 | 0.80583600  | -0.17074700 |

|      |             |             |             |
|------|-------------|-------------|-------------|
| C    | -2.23038800 | -0.04145500 | -0.03941500 |
| C    | -1.45666700 | 1.15157400  | -0.36732700 |
| C    | -2.02103400 | 2.39127500  | -0.66855300 |
| H    | -3.10067700 | 2.52638300  | -0.62473100 |
| 5 C  | -1.20144000 | 3.45737700  | -1.02982900 |
| C    | 0.18248400  | 3.24889500  | -1.09235800 |
| H    | 0.84264000  | 4.06654300  | -1.38174800 |
| C    | 0.70091500  | 2.00623500  | -0.77802900 |
| H    | 1.77180000  | 1.80915000  | -0.81476000 |
| 10 C | 0.04627500  | 0.96694400  | 4.76121400  |
| H    | -0.11603700 | 1.41573400  | 5.74303600  |
| C    | 0.91500300  | -2.82057700 | -4.32269700 |
| H    | 0.97313500  | -3.31644500 | -5.29342200 |
| C    | -5.75357300 | -1.30137100 | 0.28357800  |
| 15 C | -1.73447800 | 4.80225200  | -1.35771100 |
| O    | -6.45195200 | -0.30332400 | 0.11006600  |
| O    | -1.03738000 | 5.75729900  | -1.69486800 |
| O    | -6.24383100 | -2.54937500 | 0.51736900  |
| O    | -3.09060700 | 4.84807900  | -1.23815900 |
| 20 C | -7.70654400 | -2.58959100 | 0.53197600  |
| H    | -8.10542300 | -2.26113000 | -0.44019700 |
| H    | -7.95326000 | -3.64127000 | 0.72163800  |
| H    | -8.10003700 | -1.94468200 | 1.33272100  |
| C    | -3.64090400 | 6.16499500  | -1.56105500 |
| 25 H | -3.41246800 | 6.42718100  | -2.60527300 |
| H    | -4.72211600 | 6.05972700  | -1.41106600 |
| H    | -3.22384000 | 6.92871200  | -0.88665700 |
| Cl   | 1.16226000  | -3.12564300 | 0.99424800  |

30 **[Ru(4,4'-(COOMe)<sub>2</sub> Bid)(Bpy)]<sup>+</sup>**

|      |             |             |             |
|------|-------------|-------------|-------------|
| Ru   | -0.02572400 | -0.25714600 | -0.47376000 |
| N    | -0.03483100 | 1.75730400  | -0.34517300 |
| N    | 2.35763500  | 2.23278700  | -0.15948200 |
| N    | 2.09040400  | -0.19513700 | -0.52866500 |
| 35 N | -2.43667500 | 2.21843700  | -0.35619500 |
| N    | -2.12583200 | -0.23026800 | -0.46239800 |
| N    | 0.00260800  | -2.33028200 | -0.54739100 |
| N    | 0.04273400  | -0.71387500 | 1.45335100  |
| C    | 1.08830300  | 2.56081300  | -0.19598200 |
| 40 C | 0.64730400  | 3.95877300  | -0.05650600 |
| C    | -0.75091900 | 3.95598400  | -0.12511000 |
| C    | -1.17092700 | 2.55519100  | -0.29440200 |
| C    | 1.35973700  | 5.13912500  | 0.11321400  |
| H    | 2.45052500  | 5.13551800  | 0.16574300  |
| 45 C | 0.63054600  | 6.33200900  | 0.21673200  |
| H    | 1.15864900  | 7.27798500  | 0.35413000  |
| C    | -0.77096000 | 6.32921700  | 0.14746700  |
| H    | -1.31379800 | 7.27309400  | 0.23162400  |
| C    | -1.48160300 | 5.13321600  | -0.02562300 |
| 50 H | -2.57234300 | 5.12485300  | -0.07878800 |
| C    | -2.90165500 | 0.92824100  | -0.43635700 |
| C    | -4.31479200 | 0.84274600  | -0.46210800 |
| H    | -4.87805700 | 1.77438600  | -0.45285900 |
| C    | -4.96950000 | -0.37029600 | -0.47087900 |
| 55 C | -4.19054300 | -1.53830900 | -0.45781400 |
| H    | -4.65022600 | -2.52495000 | -0.45377000 |
| C    | -2.81687000 | -1.42221300 | -0.45389700 |
| H    | -2.21044000 | -2.32198900 | -0.45216100 |
| C    | 2.84459100  | 0.95870300  | -0.32540600 |
| 60 C | 4.25888500  | 0.89190500  | -0.29692400 |
| H    | 4.80556200  | 1.81800300  | -0.12765600 |
| C    | 4.93354900  | -0.29536400 | -0.48461400 |
| C    | 4.17512900  | -1.45610500 | -0.70531000 |

|      |             |             |             |
|------|-------------|-------------|-------------|
| H    | 4.65147000  | -2.42057500 | -0.87161300 |
| C    | 2.79955200  | -1.36023000 | -0.71433900 |
| H    | 2.20901900  | -2.25216000 | -0.89847300 |
| C    | -0.05168300 | -3.08921600 | -1.67377300 |
| 5 H  | -0.13702100 | -2.53507600 | -2.61040000 |
| C    | 0.00140700  | -4.47685200 | -1.64158700 |
| H    | -0.04493800 | -5.04057900 | -2.57351900 |
| C    | 0.11814700  | -5.12483900 | -0.40809300 |
| H    | 0.16730000  | -6.21313900 | -0.35397200 |
| 10 C | 0.16892400  | -4.36207000 | 0.75469600  |
| H    | 0.25704500  | -4.84526100 | 1.72742800  |
| C    | 0.10543600  | -2.96859000 | 0.66636700  |
| C    | 0.12437100  | -2.05164400 | 1.79928600  |
| C    | 0.20243000  | -2.44307700 | 3.13867600  |
| 15 H | 0.26686500  | -3.50270800 | 3.38558200  |
| C    | 0.19604800  | -1.48466900 | 4.14526000  |
| H    | 0.25721100  | -1.78406700 | 5.19212500  |
| C    | 0.10814500  | -0.13626500 | 3.79097800  |
| H    | 0.09773600  | 0.64813200  | 4.54780400  |
| 20 C | 0.03377900  | 0.21643500  | 2.45105400  |
| H    | -0.03728000 | 1.25675000  | 2.13780900  |
| C    | -6.45480700 | -0.38065300 | -0.46960200 |
| C    | 6.41928200  | -0.28597700 | -0.45192300 |
| O    | -7.15433400 | 0.62946200  | -0.50052500 |
| 25 O | 7.10152100  | 0.71669300  | -0.25249200 |
| O    | 6.92814700  | -1.52907800 | -0.67286600 |
| O    | -6.94268800 | -1.65062200 | -0.41773600 |
| C    | -8.40530400 | -1.69273200 | -0.37814000 |
| H    | -8.65145300 | -2.75894400 | -0.30370400 |
| 30 H | -8.77748500 | -1.14054700 | 0.49849800  |
| H    | -8.82553300 | -1.25805400 | -1.29811900 |
| C    | 8.39105200  | -1.55686100 | -0.63756300 |
| H    | 8.75385400  | -1.24493900 | 0.35399800  |
| H    | 8.65390900  | -2.60231600 | -0.83961900 |
| 35 H | 8.80550100  | -0.89177500 | -1.41069400 |

**[Ru(4,4'-(COOMe)<sub>2</sub>Bid)(Bpy)(H<sub>2</sub>)<sup>+</sup>**

|      |             |             |             |
|------|-------------|-------------|-------------|
| Ru   | -0.01077500 | -0.29615600 | -0.53915700 |
| N    | -0.01216300 | 1.73129700  | -0.38802100 |
| 40 N | 2.38762700  | 2.18603000  | -0.27481300 |
| N    | 2.10204900  | -0.24916300 | -0.58242200 |
| N    | -2.40961100 | 2.18350800  | -0.23786900 |
| N    | -2.12122800 | -0.25351900 | -0.52901700 |
| N    | 0.00028800  | -2.38000100 | -0.33917200 |
| 45 N | 0.03518200  | -0.52551900 | 1.52327900  |
| C    | 1.12007500  | 2.52185000  | -0.27489400 |
| C    | 0.68933300  | 3.91987900  | -0.09555600 |
| C    | -0.71045300 | 3.91924100  | -0.08260700 |
| C    | -1.14277800 | 2.52080500  | -0.25435200 |
| 50 C | 1.41270800  | 5.09652000  | 0.04964900  |
| H    | 2.50471900  | 5.09106400  | 0.04030300  |
| C    | 0.69251600  | 6.28909800  | 0.20642900  |
| H    | 1.22921200  | 7.23324800  | 0.32104300  |
| C    | -0.71044000 | 6.28847100  | 0.21919400  |
| 55 H | -1.24584300 | 7.23212600  | 0.34340200  |
| C    | -1.43219200 | 5.09516700  | 0.07557200  |
| H    | -2.52419200 | 5.08869900  | 0.08570200  |
| C    | -2.88454600 | 0.89905900  | -0.37894500 |
| C    | -4.29762600 | 0.81917900  | -0.37036000 |
| 60 H | -4.85676300 | 1.74403600  | -0.23954700 |
| C    | -4.95736400 | -0.38166100 | -0.53039800 |
| C    | -4.18657900 | -1.54005200 | -0.70527300 |
| H    | -4.65053900 | -2.51407200 | -0.84906200 |

|      |             |             |             |
|------|-------------|-------------|-------------|
| C    | -2.81070700 | -1.42874300 | -0.69675700 |
| H    | -2.20441700 | -2.31723900 | -0.84434500 |
| C    | 2.86406100  | 0.90290100  | -0.42155800 |
| C    | 4.27716200  | 0.82347200  | -0.40761800 |
| 5 H  | 4.83567900  | 1.74709900  | -0.26573800 |
| C    | 4.93802100  | -0.37597800 | -0.57338700 |
| C    | 4.16850000  | -1.53251100 | -0.76603300 |
| H    | 4.63346100  | -2.50488300 | -0.91762600 |
| C    | 2.79257500  | -1.42177400 | -0.76255900 |
| 10 H | 2.18712000  | -2.30874100 | -0.92260300 |
| C    | -0.01677900 | -3.29237300 | -1.35195600 |
| H    | -0.02184900 | -2.88052300 | -2.36201800 |
| C    | -0.02760100 | -4.66302700 | -1.13230100 |
| H    | -0.04140100 | -5.34403700 | -1.98344300 |
| 15 C | -0.02412200 | -5.14107200 | 0.17993000  |
| H    | -0.03741600 | -6.21215100 | 0.38576100  |
| C    | -0.00353200 | -4.22579600 | 1.22588400  |
| H    | -0.00275100 | -4.57606800 | 2.25710300  |
| C    | 0.01309400  | -2.85377200 | 0.95207100  |
| 20 C | 0.04561100  | -1.82003400 | 1.98823700  |
| C    | 0.08852400  | -2.09327300 | 3.35918400  |
| H    | 0.10284700  | -3.12440200 | 3.70903000  |
| C    | 0.11617300  | -1.04627000 | 4.27369100  |
| H    | 0.14874300  | -1.25230300 | 5.34434600  |
| 25 C | 0.10253500  | 0.26488700  | 3.79759100  |
| H    | 0.12295900  | 1.11551300  | 4.47880300  |
| C    | 0.06389400  | 0.48780600  | 2.42679900  |
| H    | 0.05369900  | 1.49796600  | 2.02025100  |
| H    | -0.00486200 | 0.21568900  | -2.20587800 |
| 30 H | -0.12248200 | -0.61514100 | -2.24802000 |
| C    | 6.42474000  | -0.38145500 | -0.54472000 |
| C    | -6.44434000 | -0.38664300 | -0.51673400 |
| O    | -7.13777100 | 0.61453800  | -0.35363600 |
| O    | 7.11638600  | 0.61831600  | -0.36592500 |
| 35 O | 6.91985900  | -1.63369300 | -0.74067100 |
| O    | -6.93725300 | -1.64030600 | -0.70882600 |
| C    | 8.38273300  | -1.67640800 | -0.70749100 |
| H    | 8.63401400  | -2.72819100 | -0.89035900 |
| H    | 8.80210600  | -1.03038700 | -1.49393900 |
| 40 H | 8.75064800  | -1.35022300 | 0.27754700  |
| C    | -8.40044400 | -1.68234400 | -0.69508400 |
| H    | -8.64961900 | -2.73544300 | -0.87318200 |
| H    | -8.78123000 | -1.34845700 | 0.28241300  |
| H    | -8.80903500 | -1.04250000 | -1.49220600 |

45  
**[Ru(4,4'-(COOMe)<sub>2</sub> Bid)(Bpy)(H)]**

|      |             |             |             |
|------|-------------|-------------|-------------|
| Ru   | -0.09512100 | -0.24226500 | -0.50747700 |
| H    | -0.27621800 | -0.06361800 | -2.13057500 |
| N    | -0.13801300 | 1.76347700  | -0.33528600 |
| 50 N | 2.24536900  | 2.26473000  | -0.13526800 |
| N    | 1.99140800  | -0.13224200 | -0.67923400 |
| N    | -2.54506600 | 2.17173800  | -0.40827100 |
| N    | -2.16849400 | -0.26910500 | -0.35156700 |
| N    | 0.01354000  | -2.30686600 | -0.45700800 |
| 55 N | 0.22574800  | -0.66395500 | 1.60185200  |
| C    | 0.96635400  | 2.57822600  | -0.16400300 |
| C    | 0.50244500  | 3.96660000  | 0.00017700  |
| C    | -0.89597700 | 3.94361500  | -0.10201900 |
| C    | -1.28569400 | 2.53756700  | -0.30316700 |
| 60 C | 1.19017200  | 5.15558800  | 0.20720300  |
| H    | 2.27954900  | 5.16810600  | 0.28566300  |
| C    | 0.44080000  | 6.33684100  | 0.31182400  |
| H    | 0.95172000  | 7.28825000  | 0.47569800  |

|      |             |             |             |
|------|-------------|-------------|-------------|
| C    | -0.95785200 | 6.31426800  | 0.20727300  |
| H    | -1.51742300 | 7.24869300  | 0.28982200  |
| C    | -1.64514000 | 5.10905900  | -0.00071800 |
| H    | -2.73417800 | 5.08588000  | -0.08182000 |
| 5 C  | -2.97720100 | 0.86896200  | -0.43717600 |
| C    | -4.38595600 | 0.73955200  | -0.49989700 |
| H    | -4.97387500 | 1.65068800  | -0.60181800 |
| C    | -4.20144500 | -1.62398600 | -0.22712400 |
| H    | -4.63663600 | -2.61546800 | -0.11321100 |
| 10 C | -2.83208900 | -1.46967100 | -0.20936900 |
| H    | -2.19736800 | -2.34276000 | -0.08854600 |
| C    | 2.74149700  | 1.00965200  | -0.38531000 |
| C    | 4.15699000  | 0.94542100  | -0.35960800 |
| H    | 4.69860900  | 1.85613400  | -0.10867200 |
| 15 C | 4.08652200  | -1.35063100 | -1.00546900 |
| H    | 4.56891900  | -2.28750500 | -1.27876100 |
| C    | 2.71116300  | -1.26028900 | -1.00671400 |
| H    | 2.12019700  | -2.12379300 | -1.29989300 |
| C    | -0.16912500 | -3.13004900 | -1.53308300 |
| 20 H | -0.44645500 | -2.62621200 | -2.45927800 |
| C    | -0.00739500 | -4.50625800 | -1.47546200 |
| H    | -0.16372200 | -5.10436400 | -2.37385800 |
| C    | 0.36238000  | -5.09853900 | -0.26390300 |
| C    | 0.53438500  | -4.28493300 | 0.84980200  |
| 25 H | 0.81298300  | -4.72761300 | 1.80570700  |
| C    | 0.34941500  | -2.90031900 | 0.74696400  |
| C    | 0.47352900  | -1.98346400 | 1.88749000  |
| C    | 0.80053100  | -2.39432900 | 3.18724700  |
| H    | 0.99571000  | -3.44408600 | 3.40278500  |
| 30 C | 0.87726700  | -1.45236800 | 4.20775200  |
| C    | 0.62205500  | -0.11030100 | 3.91556400  |
| H    | 0.67131400  | 0.65660100  | 4.68911000  |
| C    | 0.30254100  | 0.23975700  | 2.60873800  |
| H    | 0.09152800  | 1.27500100  | 2.33172200  |
| 35 C | 4.84011400  | -0.21541100 | -0.65529700 |
| H    | 5.90917585  | -0.23446892 | -0.61475614 |
| C    | -5.01086400 | -0.48672700 | -0.40308500 |
| H    | -6.07719309 | -0.55290760 | -0.46192715 |
| C    | 0.57015062  | -6.62073330 | -0.15733898 |
| 40 C | 1.23916013  | -1.89026896 | 5.63914157  |
| O    | 0.90290927  | -7.13942586 | 0.93983934  |
| O    | 1.30896219  | -1.03917693 | 6.56344703  |
| O    | 0.38430778  | -7.44761413 | -1.30913347 |
| O    | 1.49676741  | -3.26877269 | 5.91890212  |
| 45 C | 0.65966900  | -8.80897408 | -0.96887581 |
| H    | -0.0119861  | -9.12670663 | -0.19823798 |
| H    | 0.52823890  | -9.42618227 | -1.83298240 |
| H    | 1.66800617  | -8.89267287 | -0.62080878 |
| C    | 1.82110007  | -3.42241557 | 7.30313555  |
| 50 H | 0.99929309  | -3.08807567 | 7.90125770  |
| H    | 2.01741086  | -4.45347813 | 7.5115499   |
| H    | 2.68927869  | -2.84065641 | 7.53274861  |

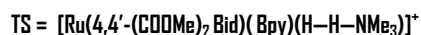

|      |             |             |             |
|------|-------------|-------------|-------------|
| 55 N | 0.13650000  | 1.61009900  | 0.21468600  |
| N    | 2.52288600  | 2.10490600  | 0.07649500  |
| N    | 2.23788700  | -0.34391300 | -0.07573600 |
| N    | -2.24137100 | 1.98956600  | 0.62906400  |
| N    | -1.95591500 | -0.30898900 | -0.22870600 |
| 60 N | 0.08869600  | -2.44511000 | -0.25492300 |
| N    | -0.01658400 | -0.92007900 | 1.87905800  |
| C    | 1.26202200  | 2.41457300  | 0.27137900  |
| C    | 0.83866000  | 3.77989600  | 0.63167800  |

---

|      |             |             |             |
|------|-------------|-------------|-------------|
| C    | -0.54953000 | 3.73876000  | 0.82219800  |
| C    | -0.97969500 | 2.35555000  | 0.54743000  |
| C    | 1.55598900  | 4.95692000  | 0.80156700  |
| H    | 2.63742900  | 4.98375400  | 0.65183500  |
| 5 C  | 0.84497300  | 6.10852100  | 1.16916100  |
| H    | 1.37831700  | 7.05112200  | 1.30957100  |
| C    | -0.54399600 | 6.06753500  | 1.36009400  |
| H    | -1.07318900 | 6.97851700  | 1.64804000  |
| C    | -1.26105300 | 4.87455300  | 1.18704200  |
| 10 H | -2.34241700 | 4.83860800  | 1.33537900  |
| C    | -2.71819300 | 0.76031500  | 0.23300100  |
| C    | -4.13056300 | 0.66444500  | 0.25759300  |
| H    | -4.68988300 | 1.51346900  | 0.64707700  |
| C    | -4.79079800 | -0.44470000 | -0.23025100 |
| 15 C | -4.02093700 | -1.49425800 | -0.75849900 |
| H    | -4.48782900 | -2.38117400 | -1.18289200 |
| C    | -2.64545800 | -1.38493400 | -0.73220400 |
| H    | -2.03609000 | -2.18561300 | -1.14423300 |
| C    | 2.99663500  | 0.82422600  | -0.09860400 |
| 20 C | 4.40158800  | 0.75626300  | -0.25550500 |
| H    | 4.95370100  | 1.69390700  | -0.29216400 |
| C    | 5.06550400  | -0.45101500 | -0.33397000 |
| C    | 4.30678800  | -1.62840300 | -0.23713300 |
| H    | 4.77783200  | -2.60932900 | -0.26459900 |
| 25 C | 2.93616300  | -1.52738000 | -0.11222500 |
| H    | 2.33721300  | -2.43154300 | -0.04744600 |
| C    | 0.19202600  | -3.18169500 | -1.39801400 |
| H    | 0.35605900  | -2.60766000 | -2.31174200 |
| C    | 0.09067300  | -4.56578300 | -1.41536200 |
| 30 H | 0.18211200  | -5.10139200 | -2.36068300 |
| C    | -0.13217800 | -5.24631000 | -0.21503400 |
| H    | -0.22360300 | -6.33312700 | -0.19717500 |
| C    | -0.23374600 | -4.51389600 | 0.96268700  |
| H    | -0.40161000 | -5.02609900 | 1.90986100  |
| 35 C | -0.11493600 | -3.11990200 | 0.93014700  |
| C    | -0.16286500 | -2.26717600 | 2.12103500  |
| C    | -0.32041900 | -2.75262600 | 3.42382100  |
| H    | -0.43548900 | -3.82135200 | 3.59931700  |
| C    | -0.32779000 | -1.86627000 | 4.49565900  |
| 40 H | -0.45188000 | -2.23711200 | 5.51409600  |
| C    | -0.16907000 | -0.50180400 | 4.24714600  |
| H    | -0.16407100 | 0.22529500  | 5.05939700  |
| C    | -0.01663600 | -0.06812500 | 2.93588700  |
| H    | 0.11608600  | 0.98800400  | 2.69877100  |
| 45 H | -0.15316400 | 0.42792600  | -2.01432900 |
| H    | 0.41169300  | -0.24584600 | -1.82347300 |
| N    | -0.74695000 | 1.32557400  | -3.08127700 |
| Ru   | 0.14302600  | -0.37941400 | -0.13178500 |
| C    | -0.63796200 | 0.43148900  | -4.24587900 |
| 50 H | 0.40069900  | 0.07016600  | -4.33093300 |
| H    | -1.30373000 | -0.43560300 | -4.09566100 |
| H    | -0.91844200 | 0.94465800  | -5.18552700 |
| C    | 0.18569200  | 2.45772300  | -3.20195800 |
| H    | 0.05049800  | 3.13355200  | -2.34318800 |
| 55 H | 1.22152600  | 2.07693900  | -3.20084600 |
| H    | 0.01702700  | 3.02805700  | -4.13651600 |
| C    | -2.13224000 | 1.79481800  | -2.91631100 |
| H    | -2.79992700 | 0.92853100  | -2.78375200 |
| H    | -2.19867900 | 2.44622000  | -2.03123700 |
| 60 H | -2.46815200 | 2.36774300  | -3.80408200 |
| C    | 6.54180100  | -0.44575300 | -0.49880900 |
| C    | -6.27627200 | -0.46322300 | -0.19713500 |
| O    | 7.22939600  | 0.57063900  | -0.57201700 |

---

|      |             |             |             |
|------|-------------|-------------|-------------|
| O    | -6.97159500 | 0.43076300  | 0.28076500  |
| O    | 7.03873000  | -1.71232900 | -0.56041200 |
| O    | -6.77186800 | -1.59499700 | -0.77027200 |
| C    | 8.49239600  | -1.74283600 | -0.72268000 |
| 5 H  | 8.74538500  | -2.80909000 | -0.76864000 |
| H    | 8.78408900  | -1.22912400 | -1.65186100 |
| H    | 8.98367000  | -1.26139700 | 0.13701100  |
| C    | -8.23458600 | -1.64059800 | -0.75890000 |
| H    | -8.48870000 | -2.58060200 | -1.26363500 |
| 10 H | -8.60732000 | -1.63882900 | 0.27697700  |
| H    | -8.64758500 | -0.77773600 | -1.30365200 |

**TS = [Ru(4,4'-(COOMe)<sub>2</sub> Bid)( Bpy)(H-CO<sub>2</sub>)]**

|      |             |             |             |
|------|-------------|-------------|-------------|
| Ru   | -0.12766300 | -0.35341300 | -0.29403600 |
| 15 H | -0.35906200 | 0.01396300  | -1.91830000 |
| N    | -0.15600200 | 1.63546900  | 0.02161800  |
| N    | 2.23254200  | 2.11901200  | 0.19034300  |
| N    | 1.96650800  | -0.25702400 | -0.42905600 |
| N    | -2.55636700 | 2.07717500  | -0.09863700 |
| 20 N | -2.20939600 | -0.36696800 | -0.14728400 |
| N    | -0.07349000 | -2.41039000 | -0.48644300 |
| N    | 0.14132800  | -1.00258500 | 1.71976200  |
| C    | 0.95657500  | 2.44088200  | 0.17780200  |
| C    | 0.50768300  | 3.83638500  | 0.32513100  |
| 25 C | -0.88932000 | 3.82785300  | 0.21357000  |
| C    | -1.29382500 | 2.42393500  | 0.02421900  |
| C    | 1.20817400  | 5.02031000  | 0.51701200  |
| H    | 2.29716300  | 5.02207800  | 0.60075800  |
| C    | 0.47145000  | 6.21121600  | 0.59837600  |
| 30 H | 0.99199400  | 7.15941100  | 0.74984100  |
| C    | -0.92666600 | 6.20282500  | 0.48506100  |
| H    | -1.47596500 | 7.14472000  | 0.54851300  |
| C    | -1.62631400 | 5.00260900  | 0.29089300  |
| H    | -2.71473400 | 4.99043800  | 0.20052200  |
| 35 C | -3.00487500 | 0.77989900  | -0.16091100 |
| C    | -4.41820000 | 0.67347600  | -0.19952200 |
| H    | -4.98259700 | 1.60297900  | -0.23517900 |
| C    | -5.05170200 | -0.55214000 | -0.16885600 |
| C    | -4.25137100 | -1.70373700 | -0.08470000 |
| 40 H | -4.71106000 | -2.69021200 | -0.03247800 |
| C    | -2.88071400 | -1.56816800 | -0.07362800 |
| H    | -2.25636300 | -2.45452200 | -0.01432100 |
| C    | 2.72082700  | 0.86558700  | -0.08544600 |
| C    | 4.13714900  | 0.79130800  | -0.03911200 |
| 45 H | 4.66907300  | 1.69576500  | 0.24823800  |
| C    | 4.81103000  | -0.36840900 | -0.35988700 |
| C    | 4.05189600  | -1.48284500 | -0.75607800 |
| H    | 4.54482900  | -2.41069000 | -1.04442500 |
| C    | 2.67855100  | -1.38298200 | -0.77898000 |
| 50 H | 2.08680300  | -2.23498000 | -1.10167500 |
| C    | -0.25993000 | -3.09286800 | -1.65304600 |
| H    | -0.46369700 | -2.47418800 | -2.52770200 |
| C    | -0.19052200 | -4.47632600 | -1.73906900 |
| H    | -0.34645400 | -4.96479800 | -2.70143800 |
| 55 C | 0.08197000  | -5.21834200 | -0.58592600 |
| H    | 0.14715900  | -6.30662000 | -0.62269900 |
| C    | 0.26237500  | -4.54345400 | 0.61661900  |
| H    | 0.46354700  | -5.10256600 | 1.52996400  |
| C    | 0.17707300  | -3.14737400 | 0.65514600  |
| 60 C | 0.31494200  | -2.35588700 | 1.88223200  |
| C    | 0.58833300  | -2.90369000 | 3.14221200  |
| H    | 0.73013600  | -3.97804200 | 3.25613800  |
| C    | 0.68607900  | -2.06818300 | 4.24988700  |



|      |             |             |             |
|------|-------------|-------------|-------------|
| H    | 0.90199400  | -2.48567800 | 5.23460300  |
| C    | 0.50554900  | -0.69301400 | 4.08202000  |
| H    | 0.57439900  | -0.00626200 | 4.92592000  |
| C    | 0.23811300  | -0.20143100 | 2.80962600  |
| 5 H  | 0.08819300  | 0.86427000  | 2.62791000  |
| C    | 0.79238600  | 0.47222200  | -3.04239800 |
| O    | 0.85369700  | 1.65698500  | -2.92512400 |
| O    | 1.07261900  | -0.56502300 | -3.56202500 |
| C    | -6.52516900 | -0.70861400 | -0.20562100 |
| 10 C | 6.28848400  | -0.48686900 | -0.32094800 |
| O    | -7.10291200 | -1.79503000 | -0.20885600 |
| O    | 6.90714200  | -1.51254200 | -0.60197000 |
| O    | 6.88097600  | 0.67770200  | 0.06619700  |
| O    | -7.16375800 | 0.49489400  | -0.23301300 |
| 15 C | 8.33897600  | 0.57847800  | 0.11756500  |
| H    | 8.74059100  | 0.32275800  | -0.87514700 |
| H    | 8.67503200  | 1.57431100  | 0.43141200  |
| H    | 8.64454300  | -0.18665900 | 0.84810200  |
| C    | -8.61980000 | 0.36072300  | -0.27081600 |
| 20 H | -8.97646700 | -0.18191400 | 0.61848100  |
| H    | -8.99340700 | 1.39185200  | -0.27638900 |
| H    | -8.93171200 | -0.17421700 | -1.18142900 |

**[Ru(4,4'-(COOMe)<sub>2</sub> Btd)(Bpy)(H-CO<sub>2</sub>)<sub>2</sub>]**

|       |             |             |             |
|-------|-------------|-------------|-------------|
| 25 Ru | -0.00473300 | -0.27781600 | -0.23524500 |
| N     | -0.03157700 | 1.72758100  | -0.01995500 |
| N     | 2.36076000  | 2.22232400  | 0.04805900  |
| N     | 2.09493900  | -0.18867400 | -0.41789400 |
| N     | -2.43613900 | 2.16579300  | 0.01088500  |
| 30 N  | -2.09832300 | -0.27734000 | -0.09950500 |
| N     | 0.06182200  | -2.34792900 | -0.31523400 |
| N     | 0.21636900  | -0.75435700 | 1.73001000  |
| C     | 1.08602300  | 2.53814300  | 0.07503600  |
| C     | 0.63991300  | 3.93340300  | 0.23366900  |
| 35 C  | -0.75982200 | 3.91879600  | 0.21264800  |
| C     | -1.17177000 | 2.51301100  | 0.05567100  |
| C     | 1.34794600  | 5.12018100  | 0.37167400  |
| H     | 2.43999600  | 5.12575100  | 0.38392500  |
| C     | 0.61309800  | 6.30842700  | 0.49263800  |
| 40 H  | 1.13811800  | 7.25963100  | 0.60387500  |
| C     | -0.78947900 | 6.29399000  | 0.47074300  |
| H     | -1.33703300 | 7.23430300  | 0.56443800  |
| C     | -1.49586900 | 5.09078400  | 0.32909800  |
| H     | -2.58767000 | 5.07399300  | 0.30901000  |
| 45 C  | -2.88793100 | 0.86969100  | -0.07175900 |
| C     | -4.29928900 | 0.76537200  | -0.10282300 |
| H     | -4.87589100 | 1.68888600  | -0.09623900 |
| C     | -4.93651700 | -0.45742000 | -0.13383900 |
| C     | -4.14151100 | -1.61433800 | -0.11659600 |
| 50 H  | -4.58624000 | -2.60781700 | -0.12336400 |
| C     | -2.76910700 | -1.47759200 | -0.09667200 |
| H     | -2.14812000 | -2.36790200 | -0.08977000 |
| C     | 2.84867300  | 0.95939400  | -0.18666600 |
| C     | 4.26377500  | 0.89997400  | -0.21345600 |
| 55 H  | 4.81113200  | 1.81945100  | -0.01352200 |
| C     | 4.93700400  | -0.26970900 | -0.49507700 |
| C     | 4.17615900  | -1.41710900 | -0.77118500 |
| H     | 4.64939500  | -2.36382600 | -1.02519100 |
| C     | 2.80040800  | -1.32909400 | -0.72297100 |
| 60 H  | 2.20565100  | -2.20735800 | -0.95440700 |
| C     | -0.07451500 | -3.10577800 | -1.43769400 |
| H     | -0.29628200 | -2.55096900 | -2.35245900 |
| C     | 0.05234600  | -4.48883400 | -1.42500800 |

|    |                                                       |             |             |             |
|----|-------------------------------------------------------|-------------|-------------|-------------|
|    | H                                                     | -0.06332500 | -5.04930600 | -2.35301500 |
|    | C                                                     | 0.45793600  | -4.37737200 | 0.94157700  |
|    | H                                                     | 0.66779900  | -4.86307100 | 1.89445000  |
|    | C                                                     | 0.31479900  | -2.98778900 | 0.87724700  |
| 5  | C                                                     | 0.39886300  | -2.08886100 | 2.02716900  |
|    | C                                                     | 0.62601000  | -2.50598200 | 3.34270400  |
|    | H                                                     | 0.76937500  | -3.56420000 | 3.55890500  |
|    | C                                                     | 0.47126000  | -0.22082600 | 4.06409100  |
|    | H                                                     | 0.49089100  | 0.54461800  | 4.83996300  |
| 10 | C                                                     | 0.25092600  | 0.15097000  | 2.74448600  |
|    | H                                                     | 0.09420100  | 1.19163300  | 2.46122700  |
|    | C                                                     | -0.77295200 | 0.38136400  | -2.85816600 |
|    | H                                                     | 0.03984700  | -0.01648400 | -2.08859600 |
|    | O                                                     | -1.53751400 | -0.50654300 | -3.26450600 |
| 15 | O                                                     | -0.62175400 | 1.57680300  | -3.13952000 |
|    | C                                                     | 0.33081100  | -5.13631500 | -0.21764600 |
|    | H                                                     | 0.44397700  | -6.22061800 | -0.17975100 |
|    | C                                                     | 0.66605700  | -1.56952600 | 4.36998200  |
|    | H                                                     | 0.84494100  | -1.88785100 | 5.39781400  |
| 20 | C                                                     | 6.42254900  | -0.25566200 | -0.50403000 |
|    | C                                                     | -6.42047700 | -0.48783400 | -0.17960200 |
|    | O                                                     | 7.10963200  | 0.73648300  | -0.27016300 |
|    | O                                                     | -7.13569100 | 0.51174100  | -0.15864700 |
|    | O                                                     | -6.89017400 | -1.76416000 | -0.25563700 |
| 25 | O                                                     | 6.92980300  | -1.48422900 | -0.80068800 |
|    | C                                                     | -8.35029600 | -1.82601200 | -0.32879700 |
|    | H                                                     | -8.57907500 | -2.89438500 | -0.42504800 |
|    | H                                                     | -8.79723600 | -1.41169300 | 0.58812700  |
|    | H                                                     | -8.71200800 | -1.26606600 | -1.20485100 |
| 30 | C                                                     | 8.39287400  | -1.50431000 | -0.80566000 |
|    | H                                                     | 8.78043700  | -1.21149300 | 0.18239100  |
|    | H                                                     | 8.65595700  | -2.54332500 | -1.03855900 |
|    | H                                                     | 8.78267800  | -0.81937500 | -1.57457800 |
| 35 | <b>[Ru(4,4'-(COOMe)<sub>2</sub> Bid)(Bpy)(O-COH)]</b> |             |             |             |
|    | Ru                                                    | -0.10184200 | -0.38757900 | -0.30767500 |
|    | N                                                     | -0.14315500 | 1.60655600  | -0.05408800 |
|    | N                                                     | 2.23993500  | 2.08013900  | 0.18308500  |
|    | N                                                     | 1.97753400  | -0.28027200 | -0.49472700 |
| 40 | N                                                     | -2.54558400 | 2.03066100  | -0.14628100 |
|    | N                                                     | -2.18449300 | -0.41224200 | -0.12782400 |
|    | N                                                     | -0.01023400 | -2.44896000 | -0.41013800 |
|    | N                                                     | 0.19439100  | -0.87178500 | 1.65256600  |
|    | C                                                     | 0.96768700  | 2.40865200  | 0.13835400  |
| 45 | C                                                     | 0.51176900  | 3.79999200  | 0.30360300  |
|    | C                                                     | -0.88442000 | 3.78941500  | 0.17603900  |
|    | C                                                     | -1.28465400 | 2.38675400  | -0.03499900 |
|    | C                                                     | 1.20604700  | 4.98243600  | 0.52442500  |
|    | H                                                     | 2.29392600  | 4.98593000  | 0.62120600  |
| 50 | C                                                     | 0.46475200  | 6.16944100  | 0.61787800  |
|    | H                                                     | 0.98066300  | 7.11628500  | 0.79164100  |
|    | C                                                     | -0.93190700 | 6.15896800  | 0.48859800  |
|    | H                                                     | -1.48472100 | 7.09804600  | 0.56208400  |
|    | C                                                     | -1.62570100 | 4.96042400  | 0.26595400  |
| 55 | H                                                     | -2.71302400 | 4.94680400  | 0.16376200  |
|    | C                                                     | -2.98434400 | 0.72758500  | -0.18442300 |
|    | C                                                     | -4.39653400 | 0.60817300  | -0.22647600 |
|    | H                                                     | -4.96988100 | 1.53079300  | -0.28784300 |
|    | C                                                     | -5.01836700 | -0.62237400 | -0.16526500 |
| 60 | C                                                     | -4.21087100 | -1.76538100 | -0.04653100 |
|    | H                                                     | -4.66347800 | -2.75367600 | 0.02822200  |
|    | C                                                     | -2.84094400 | -1.61687300 | -0.02805300 |
|    | H                                                     | -2.20673500 | -2.49384900 | 0.06495200  |

|      |             |             |             |
|------|-------------|-------------|-------------|
| C    | 2.73016700  | 0.83204500  | -0.12331700 |
| C    | 4.14518300  | 0.75893800  | -0.09632500 |
| H    | 4.68054600  | 1.64941600  | 0.22599100  |
| C    | 4.81668500  | -0.37884900 | -0.49679800 |
| 5 C  | 4.05596300  | -1.46860300 | -0.94988200 |
| H    | 4.54705200  | -2.37131800 | -1.31163100 |
| C    | 2.68048800  | -1.37777000 | -0.93023600 |
| H    | 2.08298100  | -2.21197500 | -1.28899800 |
| C    | -0.20447400 | -3.20627900 | -1.52492900 |
| 10 H | -0.47920900 | -2.64997800 | -2.42299900 |
| C    | -0.04958200 | -4.58590900 | -1.53011500 |
| H    | -0.21292900 | -5.14415000 | -2.45239100 |
| C    | 0.32423800  | -5.23370900 | -0.34817600 |
| H    | 0.46608300  | -6.31510000 | -0.32552700 |
| 15 C | 0.50861400  | -4.47784100 | 0.80479900  |
| H    | 0.79105300  | -4.96440600 | 1.73835100  |
| C    | 0.32849700  | -3.09090500 | 0.76198100  |
| C    | 0.44171000  | -2.20403100 | 1.91994300  |
| C    | 0.74350700  | -2.63606200 | 3.21611700  |
| 20 H | 0.93833600  | -3.69124900 | 3.40529500  |
| C    | 0.79256500  | -1.71843500 | 4.25968900  |
| H    | 1.03110800  | -2.04776500 | 5.27188200  |
| C    | 0.52822000  | -0.37340600 | 3.98900900  |
| H    | 0.55078300  | 0.37803900  | 4.77862300  |
| 25 C | 0.23552500  | 0.01073500  | 2.68755100  |
| H    | 0.02164200  | 1.04909000  | 2.43302500  |
| C    | 0.18379600  | 0.57563500  | -3.20789700 |
| H    | -0.22654100 | 0.51727300  | -4.24180200 |
| O    | -0.48748300 | -0.14609900 | -2.38304800 |
| 30 O | 1.17972800  | 1.27689600  | -2.99268900 |
| C    | 6.29597900  | -0.49035900 | -0.49635500 |
| C    | -6.49198500 | -0.79081800 | -0.19851000 |
| O    | -7.06057600 | -1.88150600 | -0.17973300 |
| O    | 6.91356400  | -1.47557200 | -0.89782700 |
| 35 O | 6.88689900  | 0.62948900  | 0.00680900  |
| O    | -7.13855600 | 0.40707200  | -0.24527300 |
| C    | -8.59416300 | 0.26310900  | -0.27029500 |
| H    | -8.93995600 | -0.27205700 | 0.62775500  |
| H    | -8.97437100 | 1.29169800  | -0.28451900 |
| 40 H | -8.90922500 | -0.28364800 | -1.17266100 |
| C    | 8.34711600  | 0.54692700  | 0.01463500  |
| H    | 8.67569300  | 1.48392400  | 0.48046400  |
| H    | 8.67948900  | -0.32197200 | 0.60316000  |
| H    | 8.73103900  | 0.46664300  | -1.01436400 |

45 **TS = [Ru(4,4'-(COOMe)<sub>2</sub>Bid)(Bpy)(-OCOH)]**

|      |             |             |             |
|------|-------------|-------------|-------------|
| Ru   | -0.03837700 | -0.25831100 | -0.25876100 |
| N    | -0.03684100 | 1.72860000  | 0.09933600  |
| N    | 2.36233000  | 2.19641100  | 0.16271300  |
| 50 N | 2.07540100  | -0.21818900 | -0.26997600 |
| N    | -2.43426500 | 2.20646600  | 0.07046600  |
| N    | -2.13590900 | -0.23483400 | -0.17026100 |
| N    | -0.03960300 | -2.27387100 | -0.62701800 |
| N    | 0.06855500  | -0.98199600 | 1.58734500  |
| 55 C | 1.09318400  | 2.52773000  | 0.18368700  |
| C    | 0.66414000  | 3.93124600  | 0.31330600  |
| C    | -0.73533700 | 3.93479100  | 0.28000900  |
| C    | -1.16487100 | 2.53312800  | 0.13738000  |
| C    | 1.38638600  | 5.11164200  | 0.43379500  |
| 60 H | 2.47829300  | 5.10349000  | 0.45415500  |
| C    | 0.66623100  | 6.31126800  | 0.52528100  |
| H    | 1.20265500  | 7.25774700  | 0.62158700  |
| C    | -0.73645200 | 6.31470300  | 0.49179800  |

|      |             |             |             |
|------|-------------|-------------|-------------|
| H    | -1.27240500 | 7.26370100  | 0.56225400  |
| C    | -1.45705900 | 5.11843700  | 0.36674500  |
| H    | -2.54877000 | 5.11517200  | 0.33646000  |
| C    | -2.90548200 | 0.92101800  | -0.04457800 |
| 5 C  | -4.31897200 | 0.83889800  | -0.02031200 |
| H    | -4.87781300 | 1.76914200  | 0.06844500  |
| C    | -4.97945800 | -0.36912300 | -0.09822900 |
| C    | -4.20512400 | -1.53563100 | -0.19778600 |
| H    | -4.66759700 | -2.51901100 | -0.25971600 |
| 10 C | -2.83097000 | -1.42149800 | -0.22549600 |
| H    | -2.23150600 | -2.32180800 | -0.31106200 |
| C    | 2.83758600  | 0.92010000  | -0.01951800 |
| C    | 4.25020900  | 0.83675900  | 0.03441800  |
| H    | 4.80350000  | 1.75315100  | 0.23276300  |
| 15 C | 4.91663200  | -0.35394400 | -0.16438000 |
| C    | 4.14970400  | -1.49946700 | -0.42818000 |
| H    | 4.61721900  | -2.46594500 | -0.60765800 |
| C    | 2.77529500  | -1.38452100 | -0.46848200 |
| H    | 2.18116200  | -2.26438800 | -0.69369400 |
| 20 C | -0.12278200 | -2.84493100 | -1.85799500 |
| H    | -0.18906300 | -2.14515900 | -2.69402500 |
| C    | -0.12132200 | -4.22252600 | -2.03841100 |
| H    | -0.18979600 | -4.63461100 | -3.04532900 |
| C    | -0.03104300 | -5.05697600 | -0.91993300 |
| 25 H | -0.02719900 | -6.14166400 | -1.03476400 |
| C    | 0.05341100  | -4.48673100 | 0.34734000  |
| H    | 0.12122700  | -5.12042800 | 1.23149400  |
| C    | 0.04624400  | -3.09542100 | 0.47655000  |
| C    | 0.11692600  | -2.35798300 | 1.73370100  |
| 30 C | 0.22413600  | -2.93856300 | 3.00089500  |
| H    | 0.26453000  | -4.02355800 | 3.09498100  |
| C    | 0.28342900  | -2.13326000 | 4.13264800  |
| H    | 0.36949400  | -2.58101800 | 5.12335000  |
| C    | 0.23342900  | -0.74533100 | 3.97761600  |
| 35 H | 0.27836200  | -0.07790200 | 4.83826500  |
| C    | 0.12744000  | -0.20367800 | 2.70458200  |
| H    | 0.08764600  | 0.87203700  | 2.53681300  |
| C    | 0.09553500  | 1.10315500  | -3.47776500 |
| H    | -0.02050600 | 1.56861600  | -4.49123700 |
| 40 O | -0.95214300 | 0.59195800  | -2.99390600 |
| O    | 1.23771700  | 1.15127800  | -2.96533200 |
| C    | -6.46370300 | -0.37686600 | -0.07040900 |
| C    | 6.40031900  | -0.36123100 | -0.10206100 |
| O    | -7.16139600 | 0.62820000  | 0.04924400  |
| 45 O | 7.09015300  | 0.63009700  | 0.12767900  |
| O    | -6.95573300 | -1.64099800 | -0.19757700 |
| O    | 6.90270500  | -1.60603200 | -0.33376000 |
| C    | -8.41805900 | -1.68449700 | -0.18026600 |
| H    | -8.66653700 | -2.74305100 | -0.32457900 |
| 50 H | -8.79950500 | -1.32152800 | 0.78671400  |
| H    | -8.82880300 | -1.07074000 | -0.99664700 |
| C    | 8.36420800  | -1.64540900 | -0.27643500 |
| H    | 8.71586200  | -1.34231100 | 0.72191400  |
| H    | 8.62240100  | -2.69145900 | -0.48173900 |
| 55 H | 8.79478300  | -0.97866100 | -1.03936400 |

**TS = [Ru(4,4'-(COOMe)<sub>2</sub>Bid)(Bpy)(H-H-OCOH)]**

|      |             |             |             |
|------|-------------|-------------|-------------|
| Ru   | -0.15901700 | -0.38193100 | -0.27530400 |
| N    | -0.17098000 | 1.62514400  | -0.03980500 |
| 60 N | 2.21142000  | 2.08046800  | 0.25318300  |
| N    | 1.94645300  | -0.32155100 | -0.26205100 |
| N    | -2.56537700 | 2.09022100  | -0.19502500 |
| N    | -2.25760400 | -0.35939400 | -0.26765400 |

---

|      |             |             |             |
|------|-------------|-------------|-------------|
| N    | -0.12451000 | -2.45124900 | -0.32701400 |
| N    | -0.07795900 | -0.86377100 | 1.75234500  |
| C    | 0.94387500  | 2.41603400  | 0.17827100  |
| C    | 0.50185500  | 3.81448600  | 0.32703000  |
| 5 C  | -0.89033700 | 3.81969700  | 0.17263700  |
| C    | -1.30222300 | 2.42195400  | -0.04755000 |
| C    | 1.20646000  | 4.98911100  | 0.55564700  |
| H    | 2.29229500  | 4.98004100  | 0.67251800  |
| C    | 0.47767700  | 6.18530700  | 0.62860800  |
| 10 H | 1.00138000  | 7.12707500  | 0.80642900  |
| C    | -0.91640800 | 6.19048800  | 0.47294900  |
| H    | -1.45933600 | 7.13638700  | 0.53092000  |
| C    | -1.61999400 | 4.99931300  | 0.24260400  |
| H    | -2.70506100 | 4.99763500  | 0.11825400  |
| 15 C | -3.03059900 | 0.80069700  | -0.29081100 |
| C    | -4.44407400 | 0.71976100  | -0.37854000 |
| H    | -4.99114800 | 1.65952600  | -0.41285000 |
| C    | -5.09797000 | -0.49467600 | -0.39853800 |
| C    | -4.32073600 | -1.66145100 | -0.32341500 |
| 20 H | -4.79721200 | -2.64110000 | -0.31928900 |
| C    | -2.94913900 | -1.54927600 | -0.25962200 |
| H    | -2.34255100 | -2.44813600 | -0.20952900 |
| C    | 2.69797000  | 0.81555900  | 0.02139900  |
| C    | 4.11437400  | 0.75213000  | 0.04990600  |
| 25 H | 4.64485800  | 1.67366300  | 0.27872300  |
| C    | 4.78999000  | -0.41867800 | -0.22279100 |
| C    | 4.03207000  | -1.55935800 | -0.52971000 |
| H    | 4.52491100  | -2.50229800 | -0.76395400 |
| C    | 2.65676500  | -1.46742000 | -0.53303800 |
| 30 H | 2.06703600  | -2.34326200 | -0.78522800 |
| C    | -0.20829300 | -3.22218300 | -1.44850300 |
| H    | -0.34149500 | -2.67642300 | -2.38311300 |
| C    | -0.12907300 | -4.60776200 | -1.41818900 |
| H    | -0.19976600 | -5.17132000 | -2.34892300 |
| 35 C | 0.04416800  | -5.25392500 | -0.19086600 |
| H    | 0.11756000  | -6.34091800 | -0.13666700 |
| C    | 0.11547200  | -4.48646800 | 0.96683500  |
| H    | 0.24015200  | -4.96994000 | 1.93557900  |
| C    | 0.02280400  | -3.09290000 | 0.88600100  |
| 40 C | 0.04490800  | -2.20166900 | 2.04847900  |
| C    | 0.15738900  | -2.63958200 | 3.37329700  |
| H    | 0.25575400  | -3.70235200 | 3.59162500  |
| C    | 0.14182600  | -1.71281000 | 4.41029400  |
| H    | 0.23087100  | -2.04541800 | 5.44549100  |
| 45 C | 0.00764900  | -0.35639700 | 4.10570100  |
| H    | -0.01172400 | 0.40072500  | 4.88982800  |
| C    | -0.09890600 | 0.02851500  | 2.77501900  |
| H    | -0.20691100 | 1.07582000  | 2.48994900  |
| C    | 2.19647000  | 0.11117400  | -3.41788700 |
| 50 H | 3.09097900  | -0.25165800 | -3.97564600 |
| O    | 1.28832600  | -0.79110500 | -3.27554000 |
| O    | 2.16263200  | 1.27917800  | -3.01483400 |
| C    | 6.27029500  | -0.52238600 | -0.21828300 |
| C    | -6.57353000 | -0.62469000 | -0.48069500 |
| 55 O | -7.16793600 | -1.70071000 | -0.52530900 |
| O    | 6.89039300  | -1.55311700 | -0.47497800 |
| O    | 6.85961300  | 0.66221000  | 0.10424100  |
| O    | -7.19016000 | 0.58942900  | -0.49582900 |
| C    | -8.64721700 | 0.48147100  | -0.57335700 |
| 60 H | -9.03522400 | -0.07160800 | 0.29610000  |
| H    | -9.00273300 | 1.51890500  | -0.56809700 |
| H    | -8.94473400 | -0.03081600 | -1.50159400 |
| C    | 8.31992300  | 0.58368800  | 0.10703100  |

---

|     |             |             |             |
|-----|-------------|-------------|-------------|
| H   | 8.65192400  | 1.59471100  | 0.37251000  |
| H   | 8.66252900  | -0.15032000 | 0.85303100  |
| H   | 8.68831000  | 0.29785700  | -0.89036200 |
| H   | 0.36867700  | -0.35159000 | -2.39948500 |
| s H | -0.35624000 | 0.00712000  | -1.95217500 |
